# Supplementary material for: A general and practical palladium-catalyzed monoarylation of β-methyl C(sp3)–H of alanine
Source: Royal Society of Chemistry journal article supplement (doi:10.1039/c4cc06652a), 2014-09-16

## Supporting Information

### A General and Practical Palladium-Catalyzed Monoarylation of $\beta$ -Methyl C(sp<sup>3</sup>)-H of Alanine

Kai Chen, Shuo-Qing Zhang, Jing-Wen Xu, Fang Hu, Bing-Feng Shi\*

Department of Chemistry, Zhejiang University, Hangzhou 310027, China

\*To whom correspondence should be addressed. Email: bfshi@zju.edu.cn.

|                                                                     |         |
|---------------------------------------------------------------------|---------|
| <b>Table of Contents</b>                                            | S01     |
| <b>General Information</b>                                          | S02     |
| <b>Experimental Procedures</b>                                      | S03-S23 |
| Optimization of Reaction Conditions for Mono-arylation of <b>1a</b> | S03-S06 |
| General Procedure for Mono-arylation of <b>1a</b>                   | S07-S23 |
| <b>Applications</b>                                                 | S24-S27 |
| 1. Cleavage of the 8-Aminoquinoline Directing Group                 | S24     |
| 2. Sequential Reaction for C-C Coupling                             | S25-S27 |
| <b>Chiral HPLC Data</b>                                             | S28-S33 |
| <b>References</b>                                                   | S34     |
| <b>NMR Spectrum</b>                                                 | S35-S70 |

**General Information:** Unless otherwise noted all commercial materials were used without further purification. Solvents obtained from Alading were used directly without further purification, and solvents obtained from other corporations were used after purification directed by *Purification of Laboratory Chemicals, 6th Ed.* Nuclear magnetic resonance (NMR) spectra were recorded with Bruker AVANCE 400MHz.  $^1\text{H}$  and  $^{13}\text{C}$  chemical shifts are reported in ppm downfield of tetramethylsilane and referenced to residual solvent peak ( $\text{CHCl}_3 = 7.26$  ( $^1\text{H}$  NMR), DMSO = 2.50 ( $^1\text{H}$  NMR),  $\text{CDCl}_3 = 77.16$  ( $^{13}\text{C}$  NMR)) unless otherwise noted. Multiplicities are reported using the following abbreviations: s = singlet, d = doublet, t = triplet, q = quartet, m = multiplet, br = broad resonance. High resolution mass spectra for new compounds were recorded at Mass Spectrometry Facilities, Zhejiang University. X-ray diffractions were recorded at X-Ray Facilities, Zhejiang University.

## Experimental Procedures:

### (*S*)-*N*-(2-Phthalimidopropionyl)-8-aminoquinoline (**1a**)<sup>1</sup>

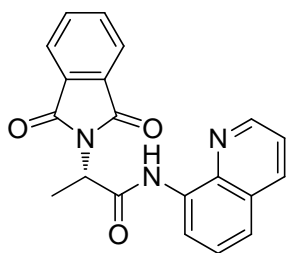

<sup>1</sup>H NMR (400 MHz, CDCl<sub>3</sub>) δ 10.32 (s, 1H), 8.77 – 8.70 (m, 1H), 8.69 (dd, *J* = 4.2, 1.3 Hz, 1H), 8.14 (dd, *J* = 8.3, 1.5 Hz, 1H), 7.90 (dd, *J* = 5.4, 3.0 Hz, 2H), 7.75 (dd, *J* = 5.4, 3.1 Hz, 2H), 7.55 – 7.48 (m, 2H), 7.42 (dd, *J* = 8.3, 4.2 Hz, 1H), 5.27 (q, *J* = 7.4 Hz, 1H), 1.98 (d, *J* = 7.3 Hz, 3H); HPLC Chiralpack<sup>®</sup> AD-H column (*n*-hexane/isopropanol = 55:45, 0.70 mL/min) *t*<sub>r</sub> 17.410 min (major): >99% ee.

### Optimization of Reaction Conditions for Mono-arylation of **1a**

#### (1) Optimization of Base for Mono-arylation (*t*-AmOH/H<sub>2</sub>O used as solvent)

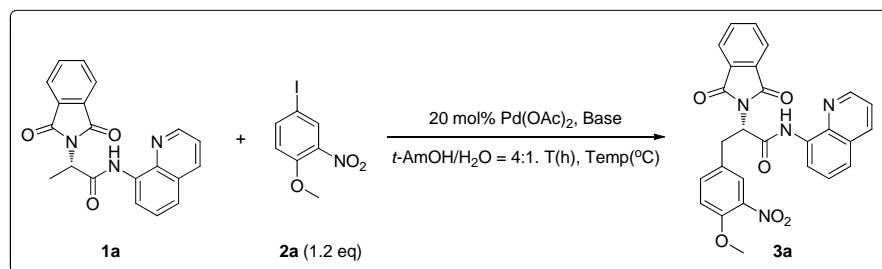

| Entry | Base                            | Temp (°C) | Time (h) | Yield     |
|-------|---------------------------------|-----------|----------|-----------|
| 1     | NaOAc                           | 90        | 13       | 58%       |
| 2     | KOAc                            | 90        | 13       | 61%       |
| 3     | LiOAc                           | 90        | 13       | 43%       |
| 4     | CsOAc                           | 90        | 13       | 55%       |
| 5     | Cs <sub>2</sub> CO <sub>3</sub> | 90        | 13       | Trace     |
| 6     | Na <sub>2</sub> CO <sub>3</sub> | 90        | 13       | <10%      |
| 7     | K <sub>2</sub> CO <sub>3</sub>  | 90        | 13       | <10%      |
| 8     | K <sub>3</sub> PO <sub>4</sub>  | 90        | 13       | <10%      |
| 9     | NaOAc                           | 80        | 24       | 59%       |
| 10    | KOAc                            | 80        | 24       | 71% (28%) |
| 11    | LiOAc                           | 80        | 24       | 52%       |
| 12    | CsOAc                           | 80        | 24       | 71% (31%) |

<sup>a</sup> Reaction conditions: **1a** (69.1 mg, 0.2 mmol, 1.0 eq), **2a** (67.0 mg, 0.24 mmol, 1.2 eq), Pd(OAc)<sub>2</sub> (9.0 mg, 0.04 mmol, 20 mol%), base (0.3 mmol, 1.5 eq), *t*-AmOH/H<sub>2</sub>O = 4:1 (1.2 mL + 0.3 mL), air atmosphere. <sup>b</sup> Yields of 2-mmol-scale reaction indicated in parentheses.

## (2) Optimization of Solvent for Mono-arylation (KOAc used as base)

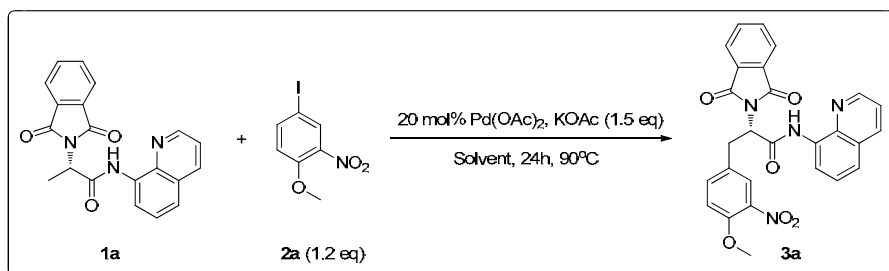

| Entry | Base | Solvent                               | Yield |
|-------|------|---------------------------------------|-------|
| 1     | KOAc | <i>t</i> -AmOH/H <sub>2</sub> O = 4/1 | 69%   |
| 2     | KOAc | MeCN                                  | 27%   |
| 3     | KOAc | <i>t</i> -AmOH                        | 40%   |
| 4     | KOAc | <i>t</i> -BuOH/H <sub>2</sub> O = 4/1 | 46%   |
| 5     | KOAc | PhMe                                  | 0     |
| 6     | KOAc | 1,4-dioxane                           | 0     |

<sup>a</sup> Reaction conditions: **1a** (69.1 mg, 0.2 mmol), **2a** (67.0 mg, 0.24 mmol, 1.2 eq), Pd(OAc)<sub>2</sub> (9.0 mg, 0.04 mmol, 20 mol%), KOAc (29.4 mg, 0.3 mmol, 1.5eq), solvent (1.5 mL), air atmosphere, reaction at 90°C for 24h.

## (3) Optimization of Solvent for Mono-arylation (AgOAc used as silver additive)

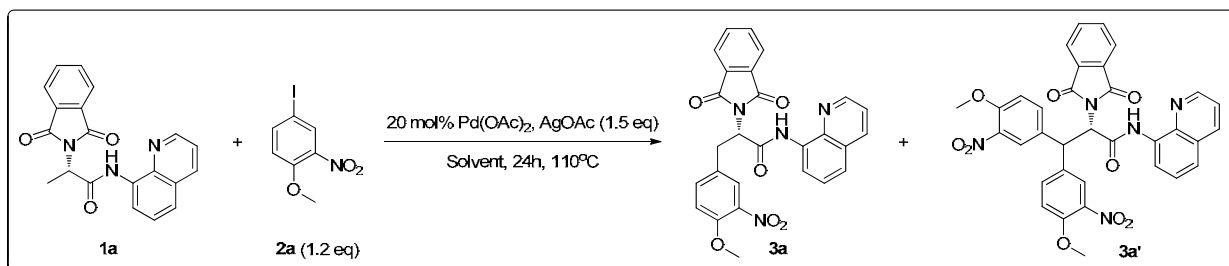

| Entry | Solvent                               | Yield <b>3a</b> + <b>3a'</b> |
|-------|---------------------------------------|------------------------------|
| 1     | <i>t</i> -AmOH/H <sub>2</sub> O = 4/1 | 27% + 4%                     |
| 2     | <i>t</i> -BuOH/H <sub>2</sub> O = 4/1 | 24% + 6%                     |
| 3     | AcOH                                  | 19% + 38%                    |
| 4     | <i>t</i> -AmOH                        | 27% + 12%                    |
| 5     | <i>t</i> -BuOH                        | 26% + 14%                    |
| 6     | MeCN                                  | 18% + 11%                    |
| 7     | PhMe                                  | 15% + 5%                     |
| 8     | DMF                                   | 0                            |

<sup>a</sup> Reaction conditions: **1a** (69.1 mg, 0.2 mmol), **2a** (67.0 mg, 0.24 mmol, 1.2 eq), Pd(OAc)<sub>2</sub> (9.0 mg, 0.04 mmol, 20 mol%), AgOAc (50.1 mg, 0.3 mmol, 1.5eq), solvent (1.5 mL), air atmosphere, reaction at 110°C for 24h.

## (4) Optimization of Silver Additive and Palladium(II) Catalysis for Mono-arylation

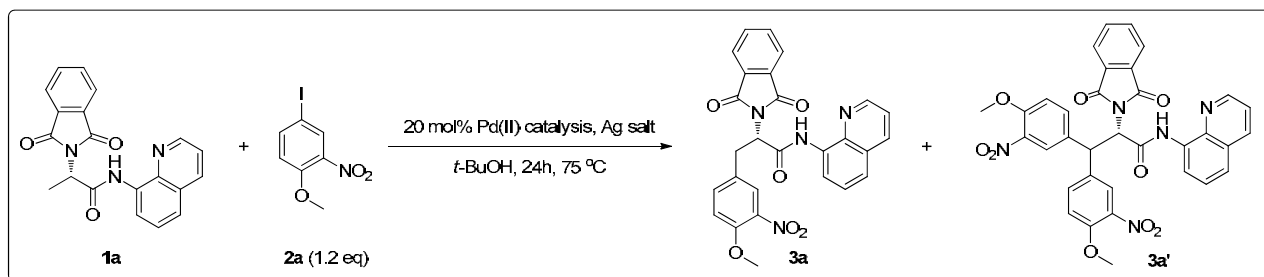

| Entry | Ag salts (eq)                            | Yield <b>3a</b> + <b>3a'</b> |
|-------|------------------------------------------|------------------------------|
| 1     | AgOAc (1.5eq)                            | 25% + 12%                    |
| 2     | Ag <sub>2</sub> CO <sub>3</sub> (0.75eq) | 26% + 24%                    |
| 3     | AgOTf (1.5eq)                            | 33% + 10%                    |
| 4     | AgNO <sub>3</sub> (1.5eq)                | 30% + 10%                    |
| 5     | AgF (1.5eq)                              | 25% + 14%                    |
| 6     | Ag <sub>2</sub> O (0.75 eq)              | 38% + 14%                    |
| 7     | <b>AgBF<sub>4</sub> (1.5eq)</b>          | 81% + 3%                     |

<sup>a</sup> Reaction conditions: **1a** (69.1 mg, 0.2 mmol), **2a** (67.0 mg, 0.24 mmol, 1.2 eq), Pd(OAc)<sub>2</sub> (9.0 mg, 0.04 mmol, 20 mol%), Ag(I) salt (0.3 mmol, 1.5 eq), *t*-BuOH (1.5 mL), air atmosphere, reaction for 24h.

#### (5) Optimization of the Loading of Palladium(II) Catalysis for Mono-arylation

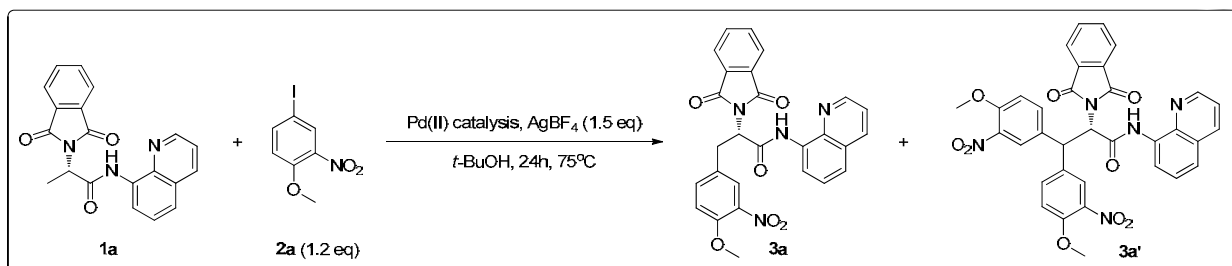

| Entry | Pd(II) Catalysis (mol%)                                         | Yield <b>3a</b> + <b>3a'</b> |
|-------|-----------------------------------------------------------------|------------------------------|
| 1     | Pd(OAc) <sub>2</sub> (20 mol%)                                  | 81% + 3%                     |
| 2     | <b>Pd(OAc)<sub>2</sub> (10 mol%)</b>                            | 79% (76%) + 3%               |
| 3     | Pd(OAc) <sub>2</sub> (5 mol%)                                   | 73% + 2%                     |
| 4     | Pd(OAc) <sub>2</sub> (2 mol%)                                   | 60% + 1%                     |
| 5     | <b>Pd(TFA)<sub>2</sub> (10 mol%)</b>                            | 81% + 3%                     |
| 6     | Pd(TFA) <sub>2</sub> (5 mol%)                                   | 75% + 3%                     |
| 7     | Pd(MeCN) <sub>4</sub> (BF <sub>4</sub> ) <sub>2</sub> (10 mol%) | 68% + 3%                     |

<sup>a</sup> Reaction conditions: **1a** (69.1 mg, 0.2 mmol), **2a** (67.0 mg, 0.24 mmol, 1.2 eq), Pd(II) catalysis (0.004-0.04 mmol, 2-20 mol%), AgBF<sub>4</sub> (58.4 mg, 0.3 mmol, 1.5 eq), *t*-BuOH (1.5 mL), air atmosphere, reaction at 75 °C for 24h. <sup>b</sup> Yields of 3-mmol-scale reaction indicated in parentheses.

(*S*)-*N*-(3-(4-Methoxy-3-nitro-phenyl)-2-phthalimidopropionyl)-8-aminoquinoline (**3a**)

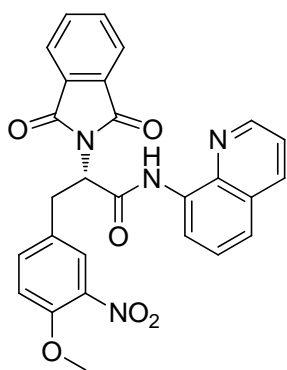

Under the optimized condition, **3a** was purified by column chromatography in petroleum ether: dichloromethane: acetone = 7:4:1 and obtained as a white solid (78.5 mg, 79%) with **1a** (6.0 mg, 9%) recovered and **3a'** (3.3 mg, 3%) isolated.  $^1\text{H}$  NMR (400 MHz,  $\text{CDCl}_3$ )  $\delta$  10.28 (s, 1H), 8.70 (dd,  $J$  = 5.1, 3.9 Hz, 1H), 8.59 (dd,  $J$  = 4.2, 1.6 Hz, 1H), 8.12 (dd,  $J$  = 8.3, 1.6 Hz, 1H), 7.85 (dd,  $J$  = 5.4, 3.1 Hz, 2H), 7.79 – 7.71 (m, 3H), 7.54 – 7.48 (m, 3H), 7.39 (dd,  $J$  = 8.3, 4.3 Hz, 1H), 6.97 (d,  $J$  = 8.6 Hz, 1H), 5.38 (dd,  $J$  = 10.3, 6.2 Hz, 1H), 3.88 (s, 3H), 3.82 (dd,  $J$  = 14.5, 6.3 Hz, 1H), 3.76 (dd,  $J$  = 14.4, 10.5 Hz, 1H);  $^{13}\text{C}$  NMR (101 MHz,  $\text{CDCl}_3$ )  $\delta$  167.97, 165.88, 152.08, 148.50, 139.45, 138.51, 138.51, 136.42, 136.42, 134.95, 134.95, 134.61, 134.61, 133.72, 133.72, 131.54, 129.33, 127.95, 127.38, 126.34, 123.90, 122.31, 121.82, 116.90, 114.02, 56.60, 55.92, 33.59; HRMS (EI)  $m/z$ : 496.1383 ( $\text{M}^+$ ); calc. for  $\text{C}_{27}\text{H}_{20}\text{N}_4\text{O}_6$ : 496.1383; HPLC Chiralpack<sup>®</sup> AD column (*n*-hexane/isopropanol = 55:45, 1.25mL/min)  $t_r$  23.832 min (major), 30.005 min (minor): 99% ee.

3-mmol scale reactions: 1158.5 mg, 78%; 1148.2 mg, 77%; 1105.0 mg, 74%, respectively.

**(S)-N-(2,2-Bis(4-methoxy-3-nitro-phenyl)-2-phthalimidopropionyl)-8-aminoquinoline (3a')**

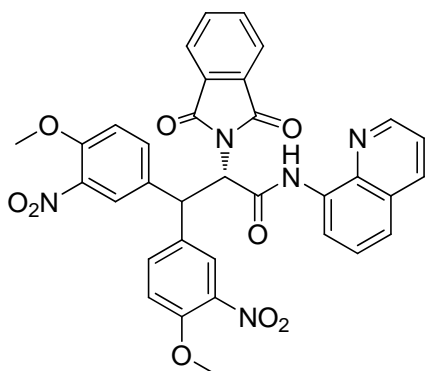

The compound **3a'** was obtained as a yellow solid.  $^1\text{H}$  NMR (400 MHz,  $\text{CDCl}_3$ )  $\delta$  10.13 (s, 1H), 8.70 (dd,  $J$  = 4.1, 1.1 Hz, 1H), 8.56 (dd,  $J$  = 7.4, 1.3 Hz, 1H), 8.11 (d,  $J$  = 7.9 Hz, 1H), 8.06 (d,  $J$  = 2.2 Hz, 1H), 7.84 (d,  $J$  = 2.2 Hz, 1H), 7.79 (dd,  $J$  = 5.4, 3.1 Hz, 2H), 7.75 (dd,  $J$  = 8.7, 2.2 Hz, 1H), 7.68 (dd,  $J$  = 5.5, 3.0 Hz, 2H), 7.58 (dd,  $J$  = 8.7, 2.2 Hz, 1H), 7.51 – 7.36 (m, 3H), 6.98 (d,  $J$  = 8.8 Hz, 2H), 5.84 (d,  $J$  = 12.3 Hz, 1H), 5.73 (d,  $J$  = 12.3 Hz, 1H), 3.84 (s, 3H), 3.80 (s, 3H);  $^{13}\text{C}$  NMR (101 MHz,  $\text{CDCl}_3$ )  $\delta$  167.68, 164.57, 152.46, 152.10, 148.37, 139.79, 139.42, 134.51, 133.93, 133.39, 133.13, 132.30, 132.13, 131.14, 127.80, 127.15, 125.32, 125.27, 123.84, 122.45, 121.75, 114.43, 114.28, 58.29, 56.52, 47.69; HRMS (EI)  $m/z$ : 647.1660 ( $\text{M}^+$ ); calc. for  $\text{C}_{34}\text{H}_{35}\text{N}_5\text{O}_9$ : 647.1652.

### General Procedure (GP1) for Mono-arylation of Alanine Derivative

Small-scale (0.2 mmol) reactions: To a 30-mL vial was added **1a** (69.1 mg, 0.2 mmol), Pd(OAc)<sub>2</sub> (4.5 mg, 0.02 mmol), aryl iodide (0.24 mmol, for several specific reactions, 0.30 mmol of aryl iodide was used), AgBF<sub>4</sub> (58.4 mg, 0.3 mmol), and *t*-BuOH (1.5 mL). The mixture was stirred at 75°C for 2 hours (for several specific substrates, the reactions were stirred for 24 hours). After cooling to room temperature, the reaction was diluted with dichloromethane (5 mL) and triethylamine (0.5 mL) was added to the mixture. After the mixture was maintained for 6 hours, it was then filtered through a pad of Celite and washed by dichloromethane (30 mL). The filtrate was washed by water (15 mL), and the aqueous phase was extracted with dichloromethane (2 × 10 mL). The combined organic phase was then washed by brine (15 mL), and dried over anhydrous MgSO<sub>4</sub>. Evaporation of organic solvent and purification by column chromatography gave the corresponding product.

Large-scale (2.0 mmol) reactions: To a 100-mL vial was added **1a** (690.7 mg, 2.0 mmol), Pd(OAc)<sub>2</sub> (44.5 mg, 0.2 mmol), aryl iodide (2.4 mmol, for several specific reactions, 3.0 mmol of aryl iodide was used), AgBF<sub>4</sub> (506.2 mg, 2.6 mmol), and *t*-BuOH/DCE (10 mL + 5 mL). The mixture was stirred at 75°C for 4 hours (for several specific substrates, the reactions were stirred for 24 hours). After cooling to room temperature, the reaction was diluted with dichloromethane (50 mL) and triethylamine (2 mL) was added to the mixture. After the mixture was maintained for 6 hours, it was then filtered through a pad of Celite and washed by dichloromethane (60 mL). The filtrate was washed by water (50 mL), and the aqueous phase was extracted with dichloromethane (2 × 30 mL). The combined organic phase was then washed by brine (50 mL), and dried over anhydrous MgSO<sub>4</sub>. Evaporation of organic solvent and purification by column chromatography gave the corresponding product.

Scope of aryl iodides:

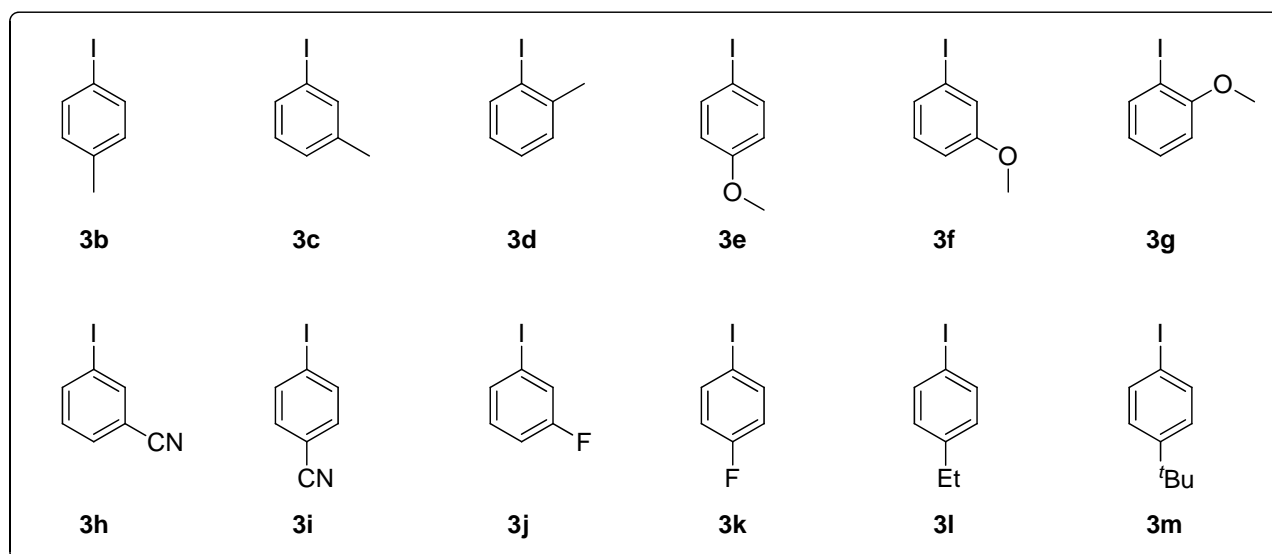

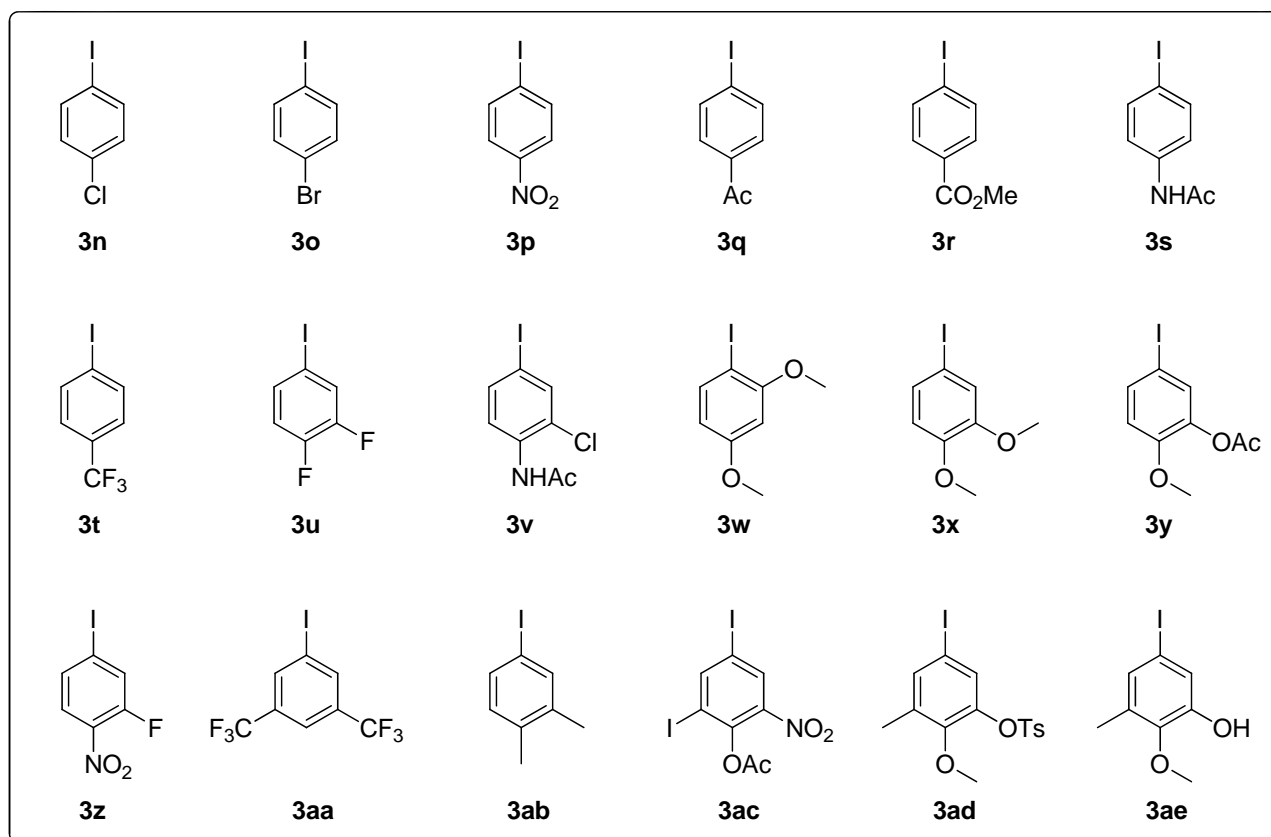

**(S)-N-(3-(4-Methyl-phenyl)-2-phthalimidopropionyl)-8-aminoquinoline (3b)**

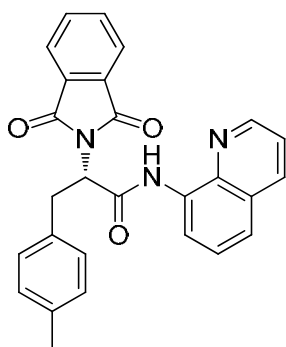

The compound **3b** was prepared according to the **GP1** and purified by column chromatography in petroleum ether: dichloromethane: ethyl acetate = 5.4:3.8:0.8. **3b** was obtained as a white solid (81.9 mg, 94% of 0.2 mmol; 776.0 mg, 89% of 2.0 mmol). <sup>1</sup>H NMR (400 MHz, CDCl<sub>3</sub>) δ 10.33 (s, 1H), 8.74 (dd, *J* = 6.3, 2.4 Hz, 1H), 8.61 (dd, *J* = 4.0, 0.9 Hz, 1H), 8.11 (dd, *J* = 8.2, 1.0 Hz, 1H), 7.82 (dd, *J* = 5.3, 3.1 Hz, 2H), 7.70 (dd, *J* = 5.3, 3.1 Hz, 2H), 7.55 – 7.45 (m, 2H), 7.38 (dd, *J* = 8.2, 4.2 Hz, 1H), 7.18 (d, *J* = 7.8 Hz, 2H), 7.03 (d, *J* = 7.7 Hz, 2H), 5.44 (dd, *J* = 8.3 Hz, 1H), 3.85 – 3.69 (m, 2H), 2.24 (s, 3H); <sup>13</sup>C NMR (101 MHz, CDCl<sub>3</sub>) δ 168.08, 166.65, 148.40, 138.61, 136.60, 136.38, 134.28, 134.01, 133.66, 131.80, 129.53, 128.98, 127.97, 127.44, 123.70, 122.10, 121.75, 116.90, 56.47, 34.46, 21.19; HRMS (EI) *m/z*: 435.1588 (*M*<sup>+</sup>); calc. for C<sub>27</sub>H<sub>21</sub>N<sub>3</sub>O<sub>3</sub>: 435.1583; HPLC Chiralpack<sup>®</sup> AD-H column (*n*-hexane/isopropanol = 55:45, 0.70mL/min) *t*<sub>r</sub> 23.556 min (major), 34.406 min (minor): 99% ee.



**(S)-N-(3-(3-Methyl-phenyl)-2-phthalimidopropionyl)-8-aminoquinoline (3c)**

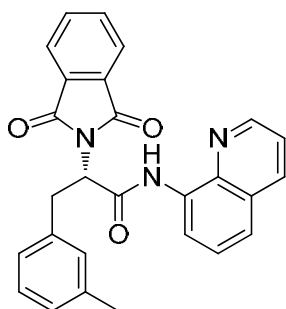

The compound **3c** was prepared according to the **GP1** and purified by column chromatography in petroleum ether: dichloromethane: ethyl acetate = 5.4:3.8:0.8. **3c** was obtained as a white solid (83.8 mg, 96% of 0.2 mmol; 791.3 mg, 91% of 2.0 mmol). <sup>1</sup>H NMR (400 MHz, CDCl<sub>3</sub>) δ 10.32 (s, 1H), 8.74 (dd, *J* = 6.4, 2.3 Hz, 1H), 8.61 (dd, *J* = 4.0, 0.9 Hz, 1H), 8.11 (dd, *J* = 8.2 Hz, 0.9 Hz, 1H), 7.82 (dd, *J* = 5.3, 3.0 Hz, 2H), 7.70 (dd, *J* = 5.3, 3.1 Hz, 2H), 7.55 – 7.45 (m, 2H), 7.38 (dd, *J* = 8.2, 4.2 Hz, 1H), 7.15 – 7.06 (m, 3H), 6.97 (d, *J* = 6.5 Hz, 1H), 5.44 (dd, *J* = 9.9, 6.6 Hz, 1H), 3.85 – 3.69 (m, 2H), 2.21 (s, 3H); <sup>13</sup>C NMR (101 MHz, CDCl<sub>3</sub>) δ 168.03, 166.58, 148.37, 138.54, 138.39, 136.70, 136.32, 134.25, 133.95, 131.75, 129.91, 128.67, 127.91, 127.80, 127.37, 126.08, 123.62, 122.08, 121.71, 116.82, 56.38, 34.79, 21.38; HRMS (EI) *m/z*: 435.1585 (*M*<sup>+</sup>); calc. for C<sub>27</sub>H<sub>21</sub>N<sub>3</sub>O<sub>3</sub>: 435.1583.

**(S)-N-(3-(4-Methoxyl-phenyl)-2-phthalimidopropionyl)-8-aminoquinoline (3e)**

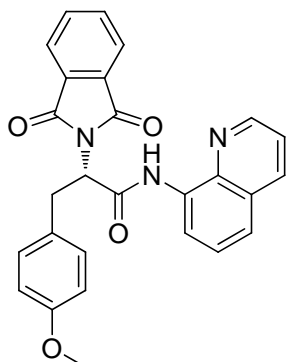

The compound **3e** was prepared according to the **GP1** and purified by column chromatography in petroleum ether: dichloromethane: ethyl acetate = 5:4.2:0.8. **3e** was obtained as a white solid (79.6 mg, 88% of 0.2 mmol; 807.4 mg, 89% of 2.0 mmol). <sup>1</sup>H NMR (400 MHz, CDCl<sub>3</sub>) δ 10.32 (s, 1H), 8.73 (dd, *J* = 6.0, 2.8 Hz, 1H), 8.62 (dd, *J* = 4.0, 1.2 Hz, 1H), 8.13 (dd, *J* = 8.2, 1.2 Hz, 1H), 7.83 (dd, *J* = 5.3, 3.1 Hz, 2H), 7.71 (dd, *J* = 5.4, 3.0 Hz, 2H), 7.55 – 7.48 (m, 2H), 7.40 (dd, *J* = 8.3, 4.2 Hz, 1H), 7.20 (d, *J* = 8.5 Hz, 2H), 6.76 (d, *J* = 8.5 Hz, 2H), 5.40 (dd, *J* = 9.6, 7.2 Hz, 1H), 3.80 – 3.67 (m, 5H); <sup>13</sup>C NMR (101 MHz, CDCl<sub>3</sub>) δ 168.07, 166.63, 158.60, 148.39, 138.58, 136.36, 134.29, 133.98, 131.76, 130.16, 128.72, 127.95, 127.41, 123.68, 122.10, 121.74, 116.87, 114.22, 56.52, 55.27, 34.05; HRMS (EI) *m/z*: 451.1528 (*M*<sup>+</sup>); calc. for C<sub>27</sub>H<sub>21</sub>N<sub>3</sub>O<sub>4</sub>: 451.1532.

**(S)-N-(3-(3-Methoxyl-phenyl)-2-phthalimidopropionyl)-8-aminoquinoline (3f)**

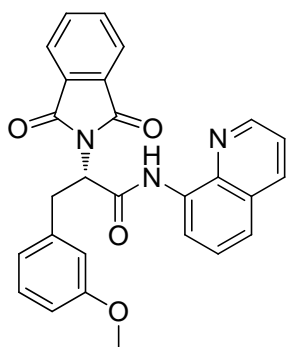

The compound **3f** was prepared according to the **GP1** and purified by column chromatography in petroleum ether: dichloromethane: ethyl acetate = 5:4.2:0.8. **3f** was obtained as a white solid (81.1 mg, 90% of 0.2 mmol; 782.8 mg, 87% of 2.0 mmol).  $^1\text{H}$  NMR (400 MHz,  $\text{CDCl}_3$ )  $\delta$  10.32 (s, 1H), 8.74 (d,  $J$  = 6.4 Hz, 1H), 8.60 (d,  $J$  = 2.7 Hz, 1H), 8.10 (d,  $J$  = 8.2 Hz, 1H), 7.82 (dd,  $J$  = 4.5, 2.2 Hz, 2H), 7.70 (dd,  $J$  = 4.4, 2.4 Hz, 2H), 7.53 – 7.46 (m, 2H), 7.37 (dd,  $J$  = 7.9, 4.0 Hz, 1H), 7.14 (t,  $J$  = 7.9 Hz, 1H), 6.89 (d,  $J$  = 7.5 Hz, 1H), 6.83 (s, 1H), 6.71 (d,  $J$  = 8.2 Hz, 1H), 5.47 (dd,  $J$  = 9.6, 6.9 Hz, 1H), 3.85 – 3.73 (m, 2H), 3.67 (s, 3H);  $^{13}\text{C}$  NMR (101 MHz,  $\text{CDCl}_3$ )  $\delta$  167.96, 166.45, 159.79, 148.35, 138.47, 138.30, 136.29, 134.27, 133.87, 131.67, 129.79, 127.85, 127.30, 123.60, 122.08, 121.70, 121.36, 116.76, 114.23, 113.00, 56.18, 55.15, 34.85; HRMS (EI)  $m/z$ : 451.1540 ( $\text{M}^+$ ); calc. for  $\text{C}_{27}\text{H}_{21}\text{N}_3\text{O}_4$ : 451.1532.

**(S)-N-(3-(2-Methoxy-phenyl)-2-phthalimidopropionyl)-8-aminoquinoline (3g)**

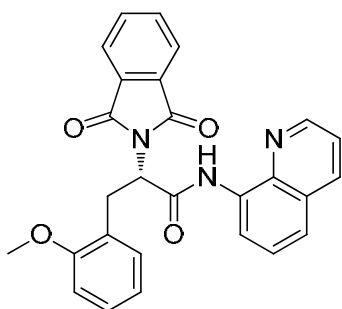

The compound **3g** was prepared according to the **GP1** and purified by column chromatography in petroleum ether: dichloromethane: ethyl acetate = 5:4.2:0.8. **3g** was obtained as a white solid (68.9 mg, 76%) with **1a** (11.5 mg, 16%) recovered.  $^1\text{H}$  NMR (400 MHz,  $\text{CDCl}_3$ )  $\delta$  10.38 (s, 1H), 8.77 (dd,  $J$  = 6.7, 1.3 Hz, 1H), 8.66 (d,  $J$  = 3.9 Hz, 1H), 8.11 (d,  $J$  = 8.2 Hz, 1H), 7.80 (dd,  $J$  = 5.2, 3.1 Hz, 2H), 7.68 (dd,  $J$  = 5.2, 3.1 Hz, 2H), 7.55 – 7.45 (m, 2H), 7.39 (dd,  $J$  = 8.2, 4.2 Hz, 1H), 7.17 (t,  $J$  = 7.8 Hz, 1H), 7.11 (d,  $J$  = 7.2 Hz, 1H), 6.83 (d,  $J$  = 8.2 Hz, 1H), 6.74 (t,  $J$  = 7.4 Hz, 1H), 5.61 (dd,  $J$  = 10.4, 4.7 Hz, 1H), 3.92 – 3.81 (m, 4H), 3.75 (dd,  $J$  = 13.5, 10.7 Hz, 1H);  $^{13}\text{C}$  NMR (101 MHz,  $\text{CDCl}_3$ )  $\delta$  168.06, 167.20, 157.75, 148.31, 138.54, 136.32, 134.09, 131.83, 131.03, 128.58, 127.91, 127.39, 125.32, 123.47, 121.90, 121.68, 120.57, 116.73, 110.31, 55.37, 54.62, 30.75; HRMS (EI)  $m/z$ : 451.1539 ( $\text{M}^+$ ); calc. for  $\text{C}_{27}\text{H}_{21}\text{N}_3\text{O}_4$ : 451.1532.

**(S)-N-(3-(3-Cyano-phenyl)-2-phthalimidopropionyl)-8-aminoquinoline (3h)**

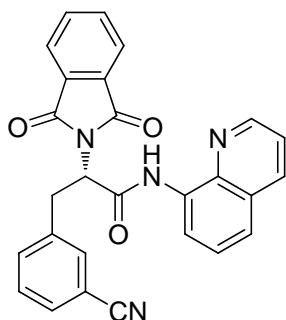

The compound **3h** was prepared according to the **GP1** and the reaction was stirred for 24 hours. **3h** was purified by column chromatography in petroleum ether: dichloromethane: acetone = 8:4:1 and obtained as a white solid (57.3 mg, 64% of 0.2 mmol; 776.4 mg, 58% of 3.0 mmol) with **1a** (15.2 mg, 22% of 0.2 mmol) recovered.  $^1\text{H}$  NMR (400 MHz,  $\text{CDCl}_3$ )  $\delta$  10.28 (s, 1H), 8.71 (dd,  $J$  = 5.1, 3.8 Hz, 1H), 8.58 (dd,  $J$  = 4.4, 1.2 Hz, 1H), 8.13 (dd,  $J$  = 8.2 Hz, 1H), 7.85 (dd,  $J$  = 5.3, 3.1 Hz, 2H), 7.75 (dd,  $J$  = 5.4, 3.1 Hz, 2H), 7.61 – 7.54 (m, 2H), 7.54 – 7.49 (m, 2H), 7.47 (d,  $J$  = 7.7 Hz, 1H), 7.41 – 7.33 (m, 2H), 5.41 (dd,  $J$  = 10.3, 6.1 Hz, 1H), 3.87 (dd,  $J$  = 14.3, 6.1 Hz, 1H), 3.80 (dd,  $J$  = 14.2, 10.6 Hz, 1H);  $^{13}\text{C}$  NMR (101 MHz,  $\text{CDCl}_3$ )  $\delta$  167.88, 165.77, 148.48, 138.63, 138.49, 136.44, 134.64, 133.68, 132.76, 131.48, 131.01, 129.67, 127.95, 127.39, 123.90, 122.33, 121.82, 118.66, 116.90, 112.87, 55.75, 34.44; HRMS (EI)  $m/z$ : 446.1365 ( $\text{M}^+$ ); calc. for  $\text{C}_{27}\text{H}_{18}\text{N}_4\text{O}_3$ : 446.1379.

**(S)-N-(3-(4-Cyano-phenyl)-2-phthalimidopropionyl)-8-aminoquinoline (3i)**

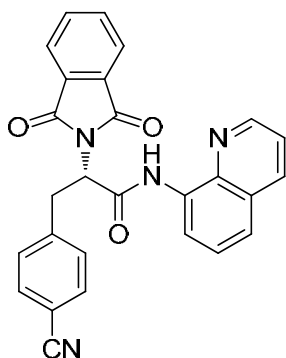

The compound **3i** was prepared according to the **GP1** and the reaction was stirred for 24 hours. **3i** was purified by column chromatography in petroleum ether: dichloromethane: acetone = 8:4:1 and obtained as a white solid (61.8 mg, 69% of 0.2 mmol; 832.4 mg, 62% of 3.0 mmol) with **1a** (13.2 mg, 19% of 0.2 mmol) recovered and **3i'** (9.5 mg, 9% of 0.2 mmol) isolated.  $^1\text{H}$  NMR (400 MHz,  $\text{CDCl}_3$ )  $\delta$  10.28 (s, 1H), 8.71 (dd,  $J$  = 5.4, 3.5 Hz, 1H), 8.57 (dd,  $J$  = 4.2, 1.4 Hz, 1H), 8.13 (dd,  $J$  = 8.3, 1.4 Hz, 1H), 7.85 (dd,  $J$  = 5.4, 3.1 Hz, 2H), 7.75 (dd,  $J$  = 5.4, 3.1 Hz, 2H), 7.57 – 7.50 (m, 4H), 7.43 – 7.36 (m, 3H), 5.44 (dd,  $J$  = 10.2, 6.4 Hz, 1H), 3.94 – 3.78 (m, 2H);  $^{13}\text{C}$  NMR (101 MHz,  $\text{CDCl}_3$ )  $\delta$  167.85, 165.77, 148.46, 142.68, 138.50, 136.46, 134.64, 133.67, 132.62, 131.47, 130.01, 127.96, 127.40, 123.88, 122.35, 121.83, 118.82, 116.90, 111.12, 55.57, 34.91; HRMS (EI)  $m/z$ : 446.1384 ( $\text{M}^+$ ); calc. for  $\text{C}_{27}\text{H}_{18}\text{N}_4\text{O}_3$ : 446.1379.

**(S)-N-(3-(4-tert-Butylcarbamoyl-phenyl)-2-phthalimidopropionyl)-8-aminoquinoline (3i')**

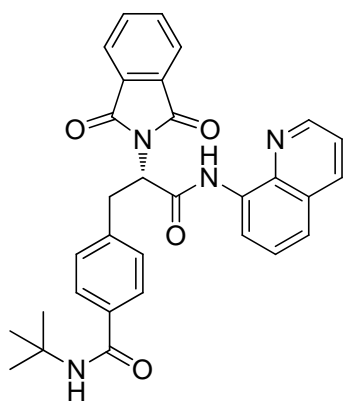

The compound **3i** was obtained as a white solid.  $^1\text{H}$  NMR (400 MHz,  $\text{CDCl}_3$ )  $\delta$  10.32 (s, 1H), 8.72 (dd,  $J = 5.7, 3.3$  Hz, 1H), 8.59 (dd,  $J = 4.2, 1.4$  Hz, 1H), 8.12 (dd,  $J = 8.3, 1.4$  Hz, 1H), 7.82 (dd,  $J = 5.4, 3.1$  Hz, 2H), 7.72 (dd,  $J = 5.4, 3.1$  Hz, 2H), 7.59 (d,  $J = 8.1$  Hz, 2H), 7.53 – 7.48 (m, 2H), 7.39 (dd,  $J = 8.3, 4.2$  Hz, 1H), 7.33 (d,  $J = 8.1$  Hz, 2H), 5.88 (s, 1H), 5.45 (dd,  $J = 9.9, 6.8$  Hz, 1H), 3.89 – 3.79 (m, 2H), 1.43 (s, 9H); HRMS (EI)  $m/z$ : 520.2110 ( $\text{M}^+$ ); calc. for  $\text{C}_{31}\text{H}_{28}\text{N}_4\text{O}_4$ : 520.2111.

**(S)-N-(3-(3-Fluoro-phenyl)-2-phthalimidopropionyl)-8-aminoquinoline (3j)**

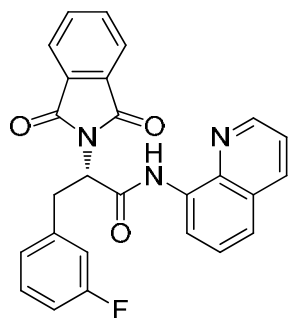

The compound **3j** was prepared according to the **GP1** and purified by column chromatography in petroleum ether: dichloromethane: ethyl acetate = 5.8:3.5:0.7. **3j** was obtained as a white solid (75.3 mg, 86% of 0.2 mmol; 698.6 mg, 79% of 2.0 mmol).  $^1\text{H}$  NMR (400 MHz,  $\text{CDCl}_3$ )  $\delta$  10.30 (s, 1H), 8.72 (dd,  $J = 6.0, 2.1$  Hz, 1H), 8.57 (d,  $J = 3.9$  Hz, 1H), 8.09 (d,  $J = 8.2$  Hz, 1H), 7.82 (dd,  $J = 4.5, 3.4$  Hz, 2H), 7.69 (dd,  $J = 4.5, 3.4$  Hz, 2H), 7.54 – 7.44 (m, 2H), 7.36 (dd,  $J = 8.1, 4.2$  Hz, 1H), 7.19 (dd,  $J = 14.2, 7.5$  Hz, 1H), 7.08 (d,  $J = 7.6$  Hz, 1H), 7.02 (d,  $J = 9.6$  Hz, 1H), 6.86 (t,  $J = 8.4$  Hz, 1H), 5.44 (dd,  $J = 9.7, 6.8$  Hz, 1H), 3.88 – 3.74 (m, 2H);  $^{13}\text{C}$  NMR (101 MHz,  $\text{CDCl}_3$ )  $\delta$  167.90, 166.12, 164.12, 161.67, 148.36, 139.41, 139.34, 138.42, 136.30, 134.37, 133.75, 131.54, 130.32, 130.24, 127.84, 127.28, 124.74, 124.72, 123.67, 122.15, 121.72, 116.77, 116.21, 116.00, 114.14, 113.93, 55.95, 34.51; HRMS (EI)  $m/z$ : 439.1335 ( $\text{M}^+$ ); calc. for  $\text{C}_{26}\text{H}_{18}\text{FN}_3\text{O}_3$ : 439.1332.

**(S)-N-(3-(4-Fluoro-phenyl)-2-phthalimidopropionyl)-8-aminoquinoline (3k)**

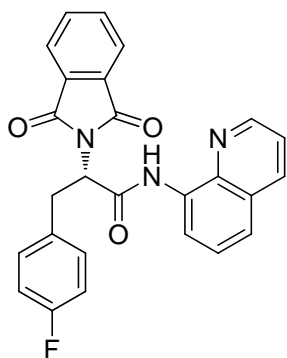

The compound **3k** was prepared according to the **GP1** and purified by column chromatography in petroleum ether: dichloromethane: ethyl acetate = 5.8:3.5:0.7. **3k** was obtained as a white solid (79.5 mg, 90% of 0.2 mmol; 804.7 mg, 91% of 2.0 mmol).  $^1\text{H}$  NMR (400 MHz,  $\text{CDCl}_3$ )  $\delta$  10.30 (s, 1H), 8.72 (dd,  $J$  = 6.2, 2.0 Hz, 1H), 8.58 (d,  $J$  = 3.3 Hz, 1H), 8.09 (d,  $J$  = 8.2 Hz, 1H), 7.81 (dd,  $J$  = 4.8, 3.1 Hz, 2H), 7.69 (dd,  $J$  = 4.9, 3.1 Hz, 2H), 7.54 – 7.44 (m, 2H), 7.36 (dd,  $J$  = 8.1, 4.2 Hz, 1H), 7.26 – 7.19 (m, 2H), 6.90 (t,  $J$  = 8.5 Hz, 2H), 5.42 (dd,  $J$  = 9.5, 7.1 Hz, 1H), 3.84 – 3.69 (m, 2H);  $^{13}\text{C}$  NMR (101 MHz,  $\text{CDCl}_3$ )  $\delta$  167.93, 166.25, 163.08, 160.64, 148.35, 138.41, 136.30, 134.35, 133.83, 133.76, 132.47, 132.44, 131.51, 130.65, 130.57, 127.84, 127.28, 123.64, 122.13, 121.71, 116.76, 115.74, 115.53, 56.19, 33.98; HRMS (EI)  $m/z$ : 439.1337 ( $\text{M}^+$ ); calc. for  $\text{C}_{26}\text{H}_{18}\text{FN}_3\text{O}_3$ : 439.1332.

**(S)-N-(3-(4-Ethyl-phenyl)-2-phthalimidopropionyl)-8-aminoquinoline (3l)**

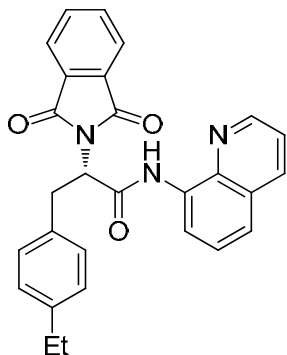

The compound **3l** was prepared according to the **GP1** and purified by column chromatography in petroleum ether: dichloromethane: ethyl acetate = 5:4.2:0.8. **3l** was obtained as a white solid (84.8 mg, 94% of 0.2 mmol; 801.5 mg, 89% of 2.0 mmol).  $^1\text{H}$  NMR (400 MHz,  $\text{CDCl}_3$ )  $\delta$  10.33 (s, 1H), 8.74 (dd,  $J$  = 6.3, 2.1 Hz, 1H), 8.61 (dd,  $J$  = 4.2, 0.9 Hz, 1H), 8.11 (dd,  $J$  = 8.3, 0.9 Hz, 1H), 7.82 (dd,  $J$  = 5.2, 3.0 Hz, 2H), 7.69 (dd,  $J$  = 5.2, 3.1 Hz, 2H), 7.55 – 7.45 (m, 2H), 7.38 (dd,  $J$  = 8.2, 4.2 Hz, 1H), 7.21 (d,  $J$  = 7.8 Hz, 2H), 7.06 (d,  $J$  = 7.7 Hz, 2H), 5.45 (dd,  $J$  = 9.1, 7.4 Hz, 1H), 3.87 – 3.69 (m, 2H), 2.55 (q,  $J$  = 7.5 Hz, 2H), 1.14 (t,  $J$  = 7.6 Hz, 3H);  $^{13}\text{C}$  NMR (101 MHz,  $\text{CDCl}_3$ )  $\delta$  168.07, 166.66, 148.38, 142.96, 138.59, 136.35, 134.25, 133.99, 133.90, 131.79, 129.04, 128.28, 127.94, 127.40, 123.64, 122.08, 121.72, 116.87, 56.44, 34.48, 28.52, 15.57; HRMS (EI)  $m/z$ : 449.1742 ( $\text{M}^+$ ); calc. for  $\text{C}_{28}\text{H}_{23}\text{N}_3\text{O}_3$ : 449.1739.

**(S)-N-(3-(4-tert-Butyl-phenyl)-2-phthalimidopropionyl)-8-aminoquinoline (3m)**

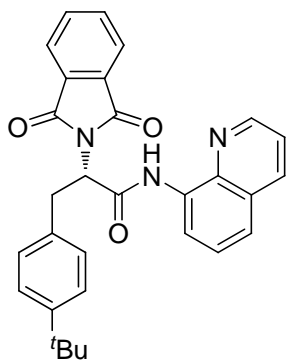

The compound **3m** was prepared according to the **GP1** and purified by column chromatography in petroleum ether: dichloromethane: ethyl acetate = 6:3:1. **3m** was obtained as a white solid (86.9 mg, 91% of 0.2 mmol; 890.1 mg, 93% of 2.0 mmol).  $^1\text{H}$  NMR (400 MHz,  $\text{CDCl}_3$ )  $\delta$  10.33 (s, 1H), 8.74 (dd,  $J$  = 6.6, 2.4 Hz, 1H), 8.62 (dd,  $J$  = 4.2, 1.6 Hz, 1H), 8.11 (dd,  $J$  = 8.3, 1.6 Hz, 1H), 7.82 (dd,  $J$  = 5.5, 3.1 Hz, 2H), 7.70 (dd,  $J$  = 5.5, 3.1 Hz, 2H), 7.55 – 7.46 (m, 2H), 7.38 (dd,  $J$  = 8.3, 4.2 Hz, 1H), 7.24 (s, 4H), 5.46 (dd,  $J$  = 9.7, 6.8 Hz, 1H), 3.86 – 3.71 (m, 2H), 1.23 (s, 9H);  $^{13}\text{C}$  NMR (101 MHz,  $\text{CDCl}_3$ )  $\delta$  = 168.05, 166.67, 149.84, 148.36, 138.56, 136.31, 134.20, 133.99, 133.68, 131.81, 128.76, 127.92, 127.36, 125.64, 123.56, 122.05, 121.69, 116.83, 56.37, 34.47, 34.38, 31.38; HRMS (ESI)  $m/z$ : 478.2110 ( $\text{MH}^+$ ); calc. for  $\text{C}_{30}\text{H}_{27}\text{N}_3\text{O}_3$ : 478.2131.

**(S)-N-(3-(4-Chloro-phenyl)-2-phthalimidopropionyl)-8-aminoquinoline (3n)**

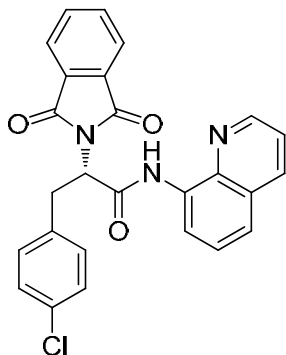

The compound **3n** was prepared according to the **GP1** and purified by column chromatography in petroleum ether: dichloromethane: ethyl acetate = 6:3:1. **3n** was obtained as a white solid (84.1 mg, 92% of 0.2 mmol; 788.1 mg, 86% of 2.0 mmol).  $^1\text{H}$  NMR (400 MHz,  $\text{CDCl}_3$ )  $\delta$  10.28 (s, 1H), 8.72 (dd,  $J$  = 5.8, 3.2 Hz, 1H), 8.60 (dd,  $J$  = 4.2, 1.6 Hz, 1H), 8.12 (dd,  $J$  = 8.3, 1.6 Hz, 1H), 7.84 (dd,  $J$  = 5.4, 3.1 Hz, 2H), 7.73 (dd,  $J$  = 5.5, 3.1 Hz, 2H), 7.56 – 7.48 (m, 2H), 7.39 (dd,  $J$  = 8.3, 4.2 Hz, 1H), 7.22 (q,  $J$  = 8.6 Hz, 4H), 5.41 (dd,  $J$  = 9.5, 7.2 Hz, 1H), 3.83 – 3.71 (m, 2H);  $^{13}\text{C}$  NMR (101 MHz,  $\text{CDCl}_3$ )  $\delta$  = 167.98, 166.21, 148.43, 138.56, 136.39, 135.40, 134.44, 133.87, 132.96, 131.66, 130.52, 129.02, 127.96, 127.41, 123.78, 122.20, 121.78, 116.89, 56.09, 34.25; HRMS (ESI)  $m/z$ : 456.1118 ( $\text{MH}^+$ ); calc. for  $\text{C}_{26}\text{H}_{18}\text{ClN}_3\text{O}_3$ : 456.1115.

**(S)-N-(3-(4-Bromo-phenyl)-2-phthalimidopropionyl)-8-aminoquinoline (3o)**

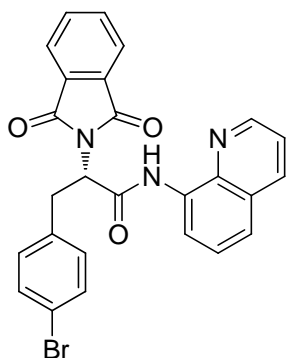

The compound **3o** was prepared according to the **GP1** and purified by column chromatography in petroleum ether: dichloromethane: ethyl acetate = 6:3:1. **3o** was obtained as a white solid (89.5 mg, 89% of 0.2 mmol; 882.6 mg, 88% of 2.0 mmol). <sup>1</sup>H NMR (400 MHz, CDCl<sub>3</sub>) δ 10.28 (s, 1H), 8.72 (dd, *J* = 5.7, 3.2 Hz, 1H), 8.60 (dd, *J* = 4.2, 1.6 Hz, 1H), 8.12 (dd, *J* = 8.3, 1.6 Hz, 1H), 7.84 (dd, *J* = 5.5, 3.1 Hz, 2H), 7.73 (dd, *J* = 5.5, 3.1 Hz, 2H), 7.55 – 7.48 (m, 2H), 7.39 (dd, *J* = 8.3, 4.2 Hz, 1H), 7.35 (d, *J* = 8.4 Hz, 2H), 7.17 (d, *J* = 8.4 Hz, 2H), 5.41 (dd, *J* = 9.3, 7.5 Hz, 1H), 3.82 – 3.71 (m, 2H); <sup>13</sup>C NMR (101 MHz, CDCl<sub>3</sub>) δ = 167.97, 166.18, 148.44, 138.55, 136.39, 135.92, 134.44, 133.85, 131.96, 131.65, 130.89, 127.95, 127.40, 123.79, 122.20, 121.78, 121.07, 116.88, 56.01, 34.31; HRMS (ESI) *m/z*: 500.0584 (MH<sup>+</sup>); calc. for C<sub>26</sub>H<sub>18</sub>BrN<sub>3</sub>O<sub>3</sub>H: 500.0610.

**(S)-N-(3-(4-Nitro-phenyl)-2-phthalimidopropionyl)-8-aminoquinoline (3p)**

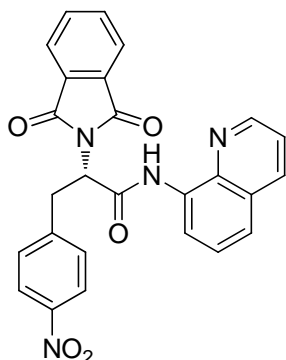

The compound **3p** was prepared according to the **GP1** and the reaction was stirred for 24 hours. **3p** was purified by column chromatography in petroleum ether: dichloromethane: acetone = 8:4:1 and obtained as a white solid (73.0 mg, 78% of 0.2 mmol; 743.2 mg, 79% of 2.0 mmol). <sup>1</sup>H NMR (400 MHz, CDCl<sub>3</sub>) δ 10.29 (s, 1H), 8.71 (dd, *J* = 5.2, 3.7 Hz, 1H), 8.56 (dd, *J* = 4.0, 1.1 Hz, 1H), 8.14 (dd, *J* = 8.3, 1.0 Hz, 1H), 8.10 (d, *J* = 8.5 Hz, 2H), 7.85 (dd, *J* = 5.3, 3.1 Hz, 2H), 7.75 (dd, *J* = 5.3, 3.0 Hz, 2H), 7.57 – 7.50 (m, 2H), 7.47 (d, *J* = 8.4 Hz, 2H), 7.39 (dd, *J* = 8.2, 4.2 Hz, 1H), 5.47 (dd, *J* = 9.3, 7.3 Hz, 1H), 3.96 – 3.86 (m, 2H); <sup>13</sup>C NMR (101 MHz, CDCl<sub>3</sub>) δ 167.86, 165.70, 148.47, 147.19, 144.83, 138.51, 136.48, 134.69, 133.66, 131.46, 130.12, 127.98, 127.42, 124.07, 123.94, 122.39, 121.85, 116.93, 55.56, 34.65; HRMS (EI) *m/z*: 466.1276 (M<sup>+</sup>); calc. for C<sub>26</sub>H<sub>18</sub>N<sub>4</sub>O<sub>5</sub>: 466.1277.

**(S)-N-(3-(4-Acetyl-phenyl)-2-phthalimidopropionyl)-8-aminoquinoline (3q)**

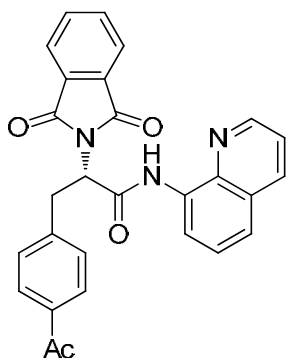

The compound **3q** was prepared according to the **GP1** and purified by column chromatography in petroleum ether: dichloromethane: acetone = 6:4:1. **3q** was obtained as a white solid (76.6 mg, 83% of 0.2 mmol; 731.0 mg, 79% of 2.0 mmol).  $^1\text{H}$  NMR (400 MHz,  $\text{CDCl}_3$ )  $\delta$  10.31 (s, 1H), 8.71 (dd,  $J$  = 5.8, 2.9 Hz, 1H), 8.55 (dd,  $J$  = 4.0, 0.8 Hz, 1H), 8.09 (d,  $J$  = 8.2 Hz, 1H), 7.85 – 7.76 (m,  $J$  = 7.4 Hz, 4H), 7.70 (dd,  $J$  = 5.2, 3.1 Hz, 2H), 7.53 – 7.46 (m,  $J$  = 8.7, 5.6 Hz, 2H), 7.41 – 7.33 (m,  $J$  = 12.4, 6.1 Hz, 3H), 5.47 (t,  $J$  = 8.3 Hz, 1H), 3.87 (d,  $J$  = 8.3 Hz, 2H), 2.51 (s, 3H);  $^{13}\text{C}$  NMR (101 MHz,  $\text{CDCl}_3$ )  $\delta$  197.90, 167.92, 166.09, 148.43, 142.61, 138.53, 136.41, 136.01, 134.48, 133.78, 131.56, 129.40, 128.91, 127.94, 127.39, 123.79, 122.25, 121.78, 116.88, 55.84, 34.75, 26.69; HRMS (EI)  $m/z$ : 463.1527 ( $\text{M}^+$ ); calc. for  $\text{C}_{28}\text{H}_{21}\text{N}_3\text{O}_4$ : 463.1532.

**(S)-N-(3-(4-Methoxycarbonyl-phenyl)-2-phthalimidopropionyl)-8-aminoquinoline (3r)**

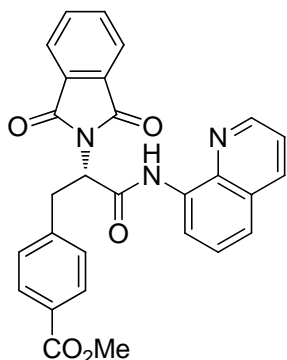

The compound **3r** was prepared according to the **GP1** and purified by column chromatography in petroleum ether: dichloromethane: ethyl acetate = 5.1:4:0.9. **3r** was obtained as a white solid (92.3 mg, 96% of 0.2 mmol; 800.3 mg, 83% of 2.0 mmol).  $^1\text{H}$  NMR (400 MHz,  $\text{CDCl}_3$ )  $\delta$  10.31 (s, 1H), 8.71 (dd,  $J$  = 5.9, 2.4 Hz, 1H), 8.56 (d,  $J$  = 3.7 Hz, 1H), 8.09 (d,  $J$  = 8.2 Hz, 1H), 7.89 (d,  $J$  = 7.9 Hz, 2H), 7.80 (dd,  $J$  = 4.8, 3.0 Hz, 2H), 7.69 (dd,  $J$  = 4.8, 3.0 Hz, 2H), 7.53 – 7.45 (m, 2H), 7.40 – 7.33 (m,  $J$  = 7.7 Hz, 3H), 5.47 (t,  $J$  = 8.3 Hz, 1H), 3.91 – 3.78 (m,  $J$  = 13.0 Hz, 5H);  $^{13}\text{C}$  NMR (101 MHz,  $\text{CDCl}_3$ )  $\delta$  167.86, 166.91, 166.06, 148.38, 142.28, 138.43, 136.33, 134.41, 133.72, 131.47, 130.06, 129.16, 128.94, 127.86, 127.31, 123.71, 122.18, 121.73, 116.78, 55.80, 52.13, 34.71; HRMS (EI)  $m/z$ : 479.1479 ( $\text{M}^+$ ); calc. for  $\text{C}_{28}\text{H}_{21}\text{N}_3\text{O}_5$ : 479.1481; HPLC Chiralpack<sup>®</sup> AD column (*n*-hexane/isopropanol = 55:45, 1.25mL/min)  $t_r$  15.898 min (major), 20.833 min (minor): 99% ee.

**(S)-N-(3-(4-Acetamido-phenyl)-2-phthalimidopropionyl)-8-aminoquinoline (3s)**



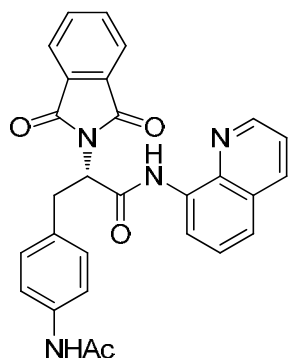

The compound **3s** was prepared according to the **GP1** and purified by column chromatography in petroleum ether: acetone = 2:3. **3s** was obtained as a white solid (75.3 mg, 83% of 0.2 mmol; 746.5 mg, 82% of 2.0 mmol) with **1a** (8.3 mg, 12% of 0.2 mmol) recovered.  $^1\text{H}$  NMR (400 MHz,  $\text{CDCl}_3$ )  $\delta$  10.34 (s, 1H), 8.73 – 8.64 (m, 1H), 8.59 (d,  $J$  = 3.3 Hz, 1H), 8.08 (d,  $J$  = 8.0 Hz, 1H), 7.81 (s, 1H), 7.77 (dd,  $J$  = 5.0, 3.1 Hz, 2H), 7.66 (dd,  $J$  = 5.2, 3.1 Hz, 2H), 7.47 (d,  $J$  = 4.3 Hz, 2H), 7.41 – 7.31 (m,  $J$  = 12.4, 6.2 Hz, 3H), 7.18 (d,  $J$  = 8.2 Hz, 2H), 5.41 (t,  $J$  = 8.3 Hz, 1H), 3.82 – 3.69 (m, 2H), 2.06 (s, 3H);  $^{13}\text{C}$  NMR (101 MHz,  $\text{CDCl}_3$ )  $\delta$  168.84, 167.97, 166.49, 148.36, 138.32, 137.20, 136.21, 134.29, 133.64, 132.04, 131.40, 129.39, 127.75, 127.10, 123.53, 122.17, 121.69, 119.96, 116.66, 56.17, 34.14, 24.38; HRMS (EI)  $m/z$ : 478.1647 ( $\text{M}^+$ ); calc. for  $\text{C}_{28}\text{H}_{22}\text{N}_4\text{O}_4$ : 478.1641.

**(S)-N-(3-(4-Trifluoromethyl-phenyl)-2-phthalimidopropionyl)-8-aminoquinoline (3t)**

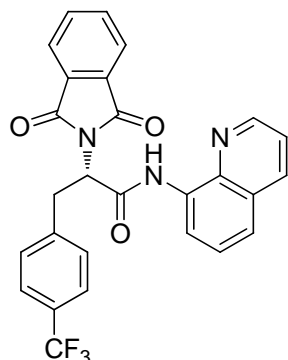

The compound **3t** was prepared according to the **GP1** and purified by column chromatography in petroleum ether: dichloromethane: ethyl acetate = 5:4.2:0.8. **3t** was obtained as a white solid (90.3 mg, 92% of 0.2 mmol; 881.5 mg, 90% of 2.0 mmol).  $^1\text{H}$  NMR (400 MHz,  $\text{CDCl}_3$ )  $\delta$  10.29 (s, 1H), 8.71 (dd,  $J$  = 6.2, 2.4 Hz, 1H), 8.55 (d,  $J$  = 3.9 Hz, 1H), 8.08 (d,  $J$  = 8.2 Hz, 1H), 7.82 (dd,  $J$  = 5.1, 3.1 Hz, 2H), 7.70 (dd,  $J$  = 5.2, 3.1 Hz, 2H), 7.53 – 7.45 (m, 4H), 7.42 (d,  $J$  = 8.0 Hz, 2H), 7.35 (dd,  $J$  = 8.2, 4.2 Hz, 1H), 5.49 (dd,  $J$  = 9.6, 7.0 Hz, 1H), 3.94 – 3.81 (m, 2H);  $^{13}\text{C}$  NMR (101 MHz,  $\text{CDCl}_3$ )  $\delta$  167.91, 166.00, 148.37, 141.09, 138.40, 136.33, 134.45, 133.69, 131.49, 129.48, 129.12, 127.86, 127.28, 125.71, 125.68, 125.50, 123.72, 122.80, 122.22, 121.74, 116.79, 55.77, 34.58; HRMS (EI)  $m/z$ : 489.1299 ( $\text{M}^+$ ); calc. for  $\text{C}_{27}\text{H}_{18}\text{F}_3\text{N}_3\text{O}_3$ : 489.1300.

**(S)-N-(3-(3,4-Difluoro-phenyl)-2-phthalimidopropionyl)-8-aminoquinoline (3u)**

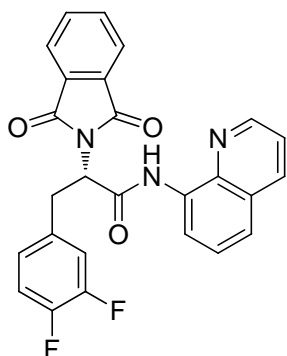

The compound **3u** was prepared according to the **GP1** and purified by column chromatography in petroleum ether: dichloromethane: ethyl acetate = 5.8:3.5:0.7. **3u** was obtained as a white solid (77.1 mg, 84%).  $^1\text{H}$  NMR (400 MHz,  $\text{CDCl}_3$ )  $\delta$  10.27 (s, 1H), 8.71 (dd,  $J$  = 5.5, 3.3 Hz, 1H), 8.59 (d,  $J$  = 4.0 Hz, 1H), 8.12 (d,  $J$  = 8.2 Hz, 1H), 7.85 (dd,  $J$  = 5.2, 3.1 Hz, 2H), 7.74 (dd,  $J$  = 5.3, 3.1 Hz, 2H), 7.55 – 7.47 (m, 2H), 7.38 (dd,  $J$  = 8.2, 4.2 Hz, 1H), 7.12 (dd,  $J$  = 10.7, 7.9 Hz, 1H), 7.06 – 6.96 (m, 2H), 5.39 (dd,  $J$  = 10.2, 6.4 Hz, 1H), 3.79 (dd,  $J$  = 14.6, 6.6 Hz, 1H), 3.73 (dd,  $J$  = 14.3, 10.6 Hz, 1H);  $^{13}\text{C}$  NMR (101 MHz,  $\text{CDCl}_3$ )  $\delta$  167.90, 165.94, 151.55, 151.43, 150.74, 150.61, 149.08, 148.96, 148.37, 148.28, 148.15, 138.39, 136.32, 134.47, 133.92, 133.88, 133.83, 133.68, 131.47, 127.85, 127.27, 125.16, 125.12, 125.10, 125.07, 123.73, 122.21, 121.74, 118.15, 117.97, 117.63, 117.46, 116.78, 55.90, 34.00; HRMS (EI)  $m/z$ : 457.1232 ( $\text{M}^+$ ); calc. for  $\text{C}_{26}\text{H}_{17}\text{F}_2\text{N}_3\text{O}_3$ : 457.1238.

**(S)-N-(3-(4-Acetamido-3-chloro-phenyl)-2-phthalimidopropionyl)-8-aminoquinoline (3v)**

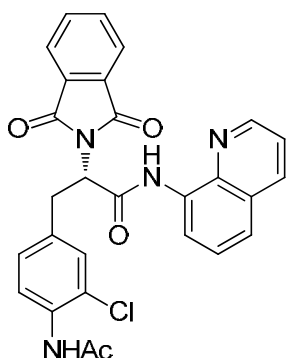

The compound **3v** was prepared according to the **GP1** and purified by column chromatography in petroleum ether: acetone = 2:1. **3v** was obtained as a white solid (82.5 mg, 80%) with **1a** (9.1 mg, 13%) recovered.  $^1\text{H}$  NMR (400 MHz,  $\text{CDCl}_3$ )  $\delta$  10.28 (s, 1H), 8.73 – 8.64 (m, 1H), 8.58 (d,  $J$  = 3.5 Hz, 1H), 8.21 (d,  $J$  = 8.4 Hz, 1H), 8.09 (d,  $J$  = 8.2 Hz, 1H), 7.82 (dd,  $J$  = 4.7, 3.3 Hz, 2H), 7.70 (dd,  $J$  = 4.7, 3.2 Hz, 2H), 7.57 (s, 1H), 7.51 – 7.45 (m, 2H), 7.36 (dd,  $J$  = 8.2, 4.2 Hz, 1H), 7.32 (s, 1H), 7.16 (d,  $J$  = 8.4 Hz, 1H), 5.38 (t,  $J$  = 8.3 Hz, 1H), 3.74 (d,  $J$  = 8.3 Hz, 2H), 2.17 (s, 3H);  $^{13}\text{C}$  NMR (101 MHz,  $\text{CDCl}_3$ )  $\delta$  168.26, 168.00, 166.14, 148.47, 138.56, 136.40, 134.47, 133.83, 133.60, 133.52, 131.66, 129.53, 128.48, 127.96, 127.40, 123.83, 122.63, 122.23, 121.78, 121.64, 116.90, 56.04, 34.01, 24.99; HRMS (EI)  $m/z$ : 512.1254 ( $\text{M}^+$ ); calc. for  $\text{C}_{28}\text{H}_{21}\text{ClN}_4\text{O}_4$ : 512.1251.

**(S)-N-(3-(2,4-Dimethoxy-phenyl)-2-phthalimidopropionyl)-8-aminoquinoline (3w)**

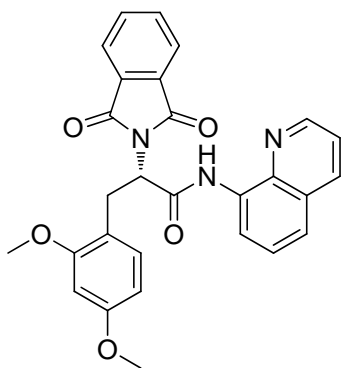

The compound **3w** was prepared according to the **GP1** and the reaction was stirred for 24 hours in presence of 0.3 mmol (1.5 eq) of 1-iodo-2,4-dimethoxybenzene. **3w** was purified by column chromatography in petroleum ether: dichloromethane: ethyl acetate = 5:4:1 and obtained as a white solid (82.0 mg, 85%).  $^1\text{H}$  NMR (400 MHz,  $\text{CDCl}_3$ )  $\delta$  10.35 (s, 1H), 8.76 (d,  $J$  = 6.6 Hz, 1H), 8.66 (d,  $J$  = 3.1 Hz, 1H), 8.11 (d,  $J$  = 8.2 Hz, 1H), 7.86 – 7.76 (m, 2H), 7.72 – 7.64 (m, 2H), 7.54 – 7.45 (m, 2H), 7.39 (dd,  $J$  = 8.2, 4.2 Hz, 1H), 7.01 (d,  $J$  = 8.2 Hz, 1H), 6.42 (s, 1H), 6.26 (d,  $J$  = 8.2 Hz, 1H), 5.56 (dd,  $J$  = 10.3, 4.9 Hz, 1H), 3.84 (s, 3H), 3.78 (dd,  $J$  = 13.8, 4.9 Hz, 1H), 3.74 – 3.63 (m, 4H);  $^{13}\text{C}$  NMR (101 MHz,  $\text{CDCl}_3$ )  $\delta$  168.15, 167.34, 160.24, 158.74, 148.34, 138.64, 136.36, 134.23, 134.10, 131.97, 131.42, 127.98, 127.47, 123.54, 121.90, 121.70, 117.67, 116.82, 104.14, 98.58, 55.46, 55.38, 54.87, 30.21; HRMS (EI)  $m/z$ : 481.1639 ( $\text{M}^+$ ); calc. for  $\text{C}_{28}\text{H}_{23}\text{N}_3\text{O}_5$ : 481.1638.

**(S)-N-(3-(3,4-Dimethoxy-phenyl)-2-phthalimidopropionyl)-8-aminoquinoline (3x)**

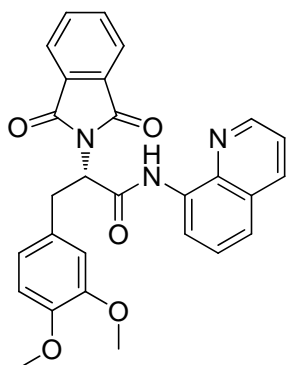

The compound **3x** was prepared according to the **GP1** and purified by column chromatography in petroleum ether: dichloromethane: ethyl acetate = 5:4:1. **3x** was obtained as a white solid (84.0 mg, 87% of 0.2 mmol; 870.3 mg, 90% of 2.0 mmol).  $^1\text{H}$  NMR (400 MHz,  $\text{CDCl}_3$ )  $\delta$  10.30 (s, 1H), 8.72 (dd,  $J$  = 6.4, 2.2 Hz, 1H), 8.59 (d,  $J$  = 3.2 Hz, 1H), 8.08 (d,  $J$  = 8.1 Hz, 1H), 7.80 (dd,  $J$  = 5.2, 3.0 Hz, 2H), 7.68 (dd,  $J$  = 5.2, 3.1 Hz, 2H), 7.53 – 7.44 (m, 2H), 7.36 (dd,  $J$  = 8.2, 4.2 Hz, 1H), 6.83 (d,  $J$  = 8.1 Hz, 1H), 6.76 (s, 1H), 6.70 (d,  $J$  = 8.2 Hz, 1H), 5.43 (dd,  $J$  = 10.3, 6.5 Hz, 1H), 3.81 – 3.67 (m, 8H);  $^{13}\text{C}$  NMR (101 MHz,  $\text{CDCl}_3$ )  $\delta$  167.97, 166.50, 148.86, 148.32, 147.85, 138.43, 136.26, 134.27, 133.86, 131.61, 129.03, 127.83, 127.27, 123.55, 122.05, 121.67, 121.20, 116.74, 111.89, 111.29, 56.31, 55.76, 55.71, 34.36; HRMS (EI)  $m/z$ : 481.1636 ( $\text{M}^+$ ); calc. for  $\text{C}_{28}\text{H}_{23}\text{N}_3\text{O}_5$ : 481.1638.

**(S)-N-(3-(3-Acetoxy-4-methoxy-phenyl)-2-phthalimidopropionyl)-8-aminoquinoline (3y)**

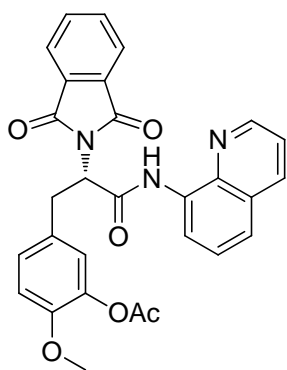

The compound **3y** was prepared according to the **GP1** and purified by column chromatography in petroleum ether: dichloromethane: ethyl acetate = 5:4:1. **3y** was obtained as a white solid (93.7 mg, 92% of 0.2 mmol; 895.4 mg, 88% of 2.0 mmol).  $^1\text{H}$  NMR (400 MHz,  $\text{CDCl}_3$ )  $\delta$  10.30 (s, 1H), 8.71 (dd,  $J$  = 5.7, 3.0 Hz, 1H), 8.60 (d,  $J$  = 3.0 Hz, 1H), 8.10 (d,  $J$  = 8.1 Hz, 1H), 7.81 (dd,  $J$  = 5.1, 3.1 Hz, 2H), 7.69 (dd,  $J$  = 5.2, 3.1 Hz, 2H), 7.53 – 7.45 (m, 2H), 7.37 (dd,  $J$  = 8.2, 4.2 Hz, 1H), 7.13 (d,  $J$  = 8.3 Hz, 1H), 7.00 (s, 1H), 6.81 (d,  $J$  = 8.4 Hz, 1H), 5.42 (dd,  $J$  = 9.1, 7.7 Hz, 1H), 3.80 – 3.68 (m, 5H), 2.24 (s, 3H);  $^{13}\text{C}$  NMR (101 MHz,  $\text{CDCl}_3$ )  $\delta$  168.87, 168.01, 166.33, 150.07, 148.37, 139.66, 138.43, 136.29, 134.26, 133.81, 131.61, 129.14, 127.84, 127.35, 127.28, 123.65, 123.52, 122.09, 121.71, 116.74, 112.55, 56.03, 55.85, 33.88, 20.69; HRMS (EI)  $m/z$ : 509.1588 ( $\text{M}^+$ ); calc. for  $\text{C}_{29}\text{H}_{23}\text{N}_3\text{O}_6$ : 509.1587.

**(S)-N-(3-(4-Nitro-3-fluoro-phenyl)-2-phthalimidopropionyl)-8-aminoquinoline (3z)**

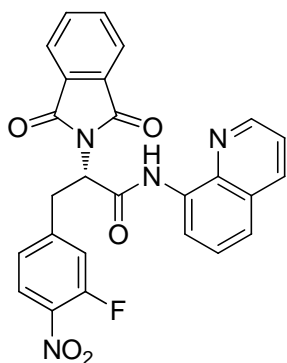

The compound **3z** was prepared according to the **GP1** and the reaction was stirred for 24 hours. **3z** was purified by column chromatography in petroleum ether: dichloromethane: acetone = 8:4:1 and obtained as a white solid (72.8 mg, 75% of 0.2 mmol; 1284.1 mg, 88% of 3.0 mmol).  $^1\text{H}$  NMR (400 MHz, DMSO)  $\delta$  10.26 (s, 1H), 8.69 (p,  $J$  = 4.4 Hz, 1H), 8.55 (dd,  $J$  = 4.1, 1.2 Hz, 1H), 8.13 (dd,  $J$  = 8.3, 1.2 Hz, 1H), 7.95 (t,  $J$  = 8.2 Hz, 1H), 7.87 (dd,  $J$  = 5.4, 3.1 Hz, 2H), 7.77 (dd,  $J$  = 5.4, 3.1 Hz, 2H), 7.57 – 7.47 (m, 2H), 7.39 (dd,  $J$  = 8.3, 4.2 Hz, 1H), 7.30 – 7.18 (m, 2H), 5.45 (dd,  $J$  = 10.2, 6.3 Hz, 1H), 3.96 – 3.80 (m, 2H);  $^{13}\text{C}$  NMR (101 MHz,  $\text{CDCl}_3$ )  $\delta$  167.84, 165.39, 157.00, 154.35, 148.50, 146.78, 146.70, 138.47, 136.50, 134.80, 133.55, 131.42, 127.97, 127.40, 126.65, 125.31, 125.27, 124.04, 122.46, 121.88, 119.27, 119.07, 116.93, 55.20, 34.60; HRMS (EI)  $m/z$ : 484.1184 ( $\text{M}^+$ ); calc. for  $\text{C}_{26}\text{H}_{17}\text{FN}_4\text{O}_5$ : 484.1183.

**(S)-N-(3-(3,5-Bis(trifluoromethyl)-phenyl)-2-phthalimidopropionyl)-8-aminoquinoline (3aa)**

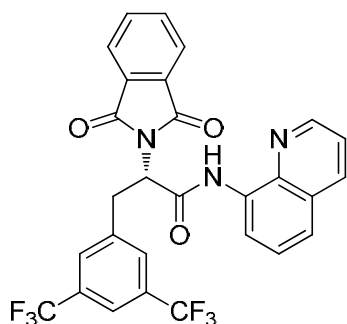

The compound **3aa** was prepared according to the **GP1** and purified by column chromatography in petroleum ether: dichloromethane: ethyl acetate = 5:4.2:0.8. **3aa** was obtained as a white solid (100.8 mg, 90%).  $^1\text{H}$  NMR (400 MHz,  $\text{CDCl}_3$ )  $\delta$  10.27 (s, 1H), 8.70 (dd,  $J$  = 5.7, 2.5 Hz, 1H), 8.54 (d,  $J$  = 4.0 Hz, 1H), 8.09 (d,  $J$  = 8.2 Hz, 1H), 7.83 (dd,  $J$  = 4.6, 3.1 Hz, 2H), 7.78 – 7.70 (m, 4H), 7.68 (s, 1H), 7.54 – 7.47 (m, 2H), 7.35 (dd,  $J$  = 8.1, 4.2 Hz, 1H), 5.44 (dd,  $J$  = 10.3, 6.0 Hz, 1H), 3.97 (dd,  $J$  = 14.3, 5.9 Hz, 1H), 3.87 (dd,  $J$  = 14.1, 10.7 Hz, 1H);  $^{13}\text{C}$  NMR (101 MHz,  $\text{CDCl}_3$ )  $\delta$  167.82, 165.51, 148.44, 139.73, 138.41, 136.38, 134.66, 133.55, 132.43, 132.10, 131.77, 131.43, 131.34, 129.50, 127.89, 127.31, 124.52, 123.83, 122.34, 121.78, 121.19, 121.15, 121.12, 116.86, 55.54, 34.41; HRMS (EI)  $m/z$ : 557.1169 ( $\text{M}^+$ ); calc. for  $\text{C}_{28}\text{H}_{17}\text{F}_6\text{N}_3\text{O}_3$ : 557.1174.

**(S)-N-(3-(3,4-Dimethyl-phenyl)-2-phthalimidopropionyl)-8-aminoquinoline (3ab)**

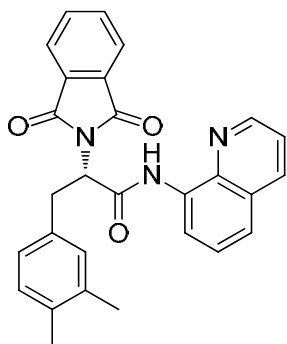

The compound **3ab** was prepared according to the **GP1** and purified by column chromatography in petroleum ether: dichloromethane: ethyl acetate = 5:4.2:0.8. **3ab** was obtained as a white solid (88.4 mg, 98% of 0.2 mmol; 2074.5 mg, 92% of 5.0 mmol).  $^1\text{H}$  NMR (400 MHz,  $\text{CDCl}_3$ )  $\delta$  10.31 (s, 1H), 8.74 (dd,  $J$  = 6.1, 2.6 Hz, 1H), 8.62 (dd,  $J$  = 3.9, 1.1 Hz, 1H), 8.12 (dd,  $J$  = 8.2, 1.1 Hz, 1H), 7.83 (dd,  $J$  = 5.3, 3.0 Hz, 2H), 7.71 (dd,  $J$  = 5.3, 3.1 Hz, 2H), 7.55 – 7.47 (m, 2H), 7.39 (dd,  $J$  = 8.2, 4.2 Hz, 1H), 7.08 – 6.94 (m, 3H), 5.42 (dd,  $J$  = 9.7, 6.8 Hz, 1H), 3.80 – 3.67 (m, 2H), 2.15 (s, 3H), 2.12 (s, 3H);  $^{13}\text{C}$  NMR (101 MHz,  $\text{CDCl}_3$ )  $\delta$  168.11, 166.72, 148.35, 138.60, 136.95, 136.37, 135.20, 134.23, 134.10, 134.03, 131.86, 130.40, 130.04, 127.96, 127.43, 126.40, 123.65, 122.07, 121.72, 116.91, 56.54, 34.47, 19.75, 19.48; HRMS (EI)  $m/z$ : 449.1746 ( $\text{M}^+$ ); calc. for  $\text{C}_{28}\text{H}_{23}\text{N}_3\text{O}_3$ : 449.1739. HPLC Chiralpack<sup>®</sup> AD-H column (*n*-hexane/isopropanol = 55:45, 0.70mL/min)  $t_r$  20.364 min (major), 27.017 min (minor): 99% ee.

**(S)-N-(3-(4-Acetoxy-3-iodo-5-nitro-phenyl)-2-phthalimidopropionyl)-8-aminoquinoline (3ac)**

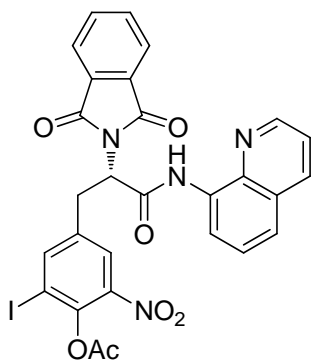

The compound **3ac** was prepared according to the **GP1** and the reaction was stirred for 24 hours in presence of 0.3 mmol (1.5 eq) of 2,4-diiodo-6-nitrophenyl acetate. **3ac** was purified by column chromatography in petroleum ether: dichloromethane: acetone = 7:4:1 and obtained as a white solid (96.8 mg, 74% of 0.2 mmol; 960.4 mg, 92% of 2.0 mmol) with **1a** (8.5 mg, 12% of 0.2 mmol) recovered.  $^1\text{H}$  NMR (400 MHz,  $\text{CDCl}_3$ )  $\delta$  10.26 (s, 1H), 8.70 (dd,  $J$  = 5.1, 3.8 Hz, 1H), 8.58 (dd,  $J$  = 4.1, 0.9 Hz, 1H), 8.13 (dd,  $J$  = 8.2, 0.9 Hz, 1H), 8.07 (d,  $J$  = 1.5 Hz, 1H), 8.01 (d,  $J$  = 1.5 Hz, 1H), 7.89 (dd,  $J$  = 5.3, 3.0 Hz, 2H), 7.77 (dd,  $J$  = 5.3, 3.1 Hz, 2H), 7.57 – 7.49 (m, 2H), 7.39 (dd,  $J$  = 8.3, 4.2 Hz, 1H), 5.41 (dd,  $J$  = 9.9, 6.2 Hz, 1H), 3.89 (dd,  $J$  = 14.5, 6.1 Hz, 1H), 3.77 (dd,  $J$  = 14.5, 10.1 Hz, 1H), 2.38 (s, 3H);  $^{13}\text{C}$  NMR (101 MHz,  $\text{CDCl}_3$ )  $\delta$  167.93, 167.43, 165.37, 148.57, 144.97, 143.87, 142.03, 138.49, 138.00, 136.46, 134.77, 133.59, 131.51, 127.97, 127.40, 126.64, 124.09, 122.43, 121.86, 116.97, 94.88, 55.35, 33.75, 21.06; HRMS (EI)  $m/z$ : 650.0294 ( $\text{M}^+$ ); calc. for  $\text{C}_{28}\text{H}_{19}\text{IN}_4\text{O}_7$ : 650.0298. **(S)-N-(3-(4-Methoxy-3-methyl-5-tosyloxy-phenyl)-2-phthalimidopropionyl)-8-aminoquinoline (3ad)**

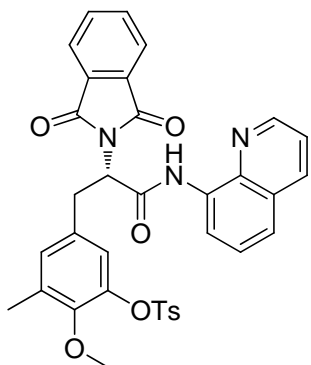

The compound **3ad** was prepared according to the **GP1** and purified by column chromatography in petroleum ether: dichloromethane: ethyl acetate = 5:4.2:0.8. **3ad** was obtained as a white solid (120.0 mg, 94%).  $^1\text{H}$  NMR (400 MHz,  $\text{CDCl}_3$ )  $\delta$  10.22 (s, 1H), 8.73 – 8.67 (m, 1H), 8.59 (dd,  $J$  = 4.0, 1.2 Hz, 1H), 8.10 (dd,  $J$  = 8.2, 0.9 Hz, 1H), 7.84 (dd,  $J$  = 5.3, 3.0 Hz, 2H), 7.71 (dd,  $J$  = 5.3, 3.1 Hz, 2H), 7.62 (d,  $J$  = 8.2 Hz, 2H), 7.49 (d,  $J$  = 4.7 Hz, 2H), 7.38 (dd,  $J$  = 8.2, 4.2 Hz, 1H), 7.24 (s, 1H), 6.99 (s, 1H), 6.81 (s, 1H), 5.25 (dd,  $J$  = 9.9, 6.4 Hz, 1H), 3.69 (dd,  $J$  = 14.2, 6.4 Hz, 1H), 3.65 – 3.55 (m, 4H), 2.40 (s, 3H), 2.07 (s, 3H);  $^{13}\text{C}$  NMR (101 MHz,  $\text{CDCl}_3$ )  $\delta$  167.95, 166.16, 149.84, 148.45, 145.39, 142.45, 138.37, 136.29, 134.36, 133.73, 133.47, 132.88, 132.29, 131.63, 130.33, 129.67, 128.44,

127.83, 127.23, 123.66, 122.16, 121.83, 121.76, 116.71, 60.68, 56.02, 34.05, 21.79, 16.03; HRMS (EI)  $m/z$ : 635.1734 ( $M^+$ ); calc. for  $C_{35}H_{29}N_3O_7S$ : 635.1726.

**(S)-N-(3-(3-Hydroxy-4-methoxy-5-methyl-phenyl)-2-phthalimidopropionyl)-8-aminoquinoline (3ae)**

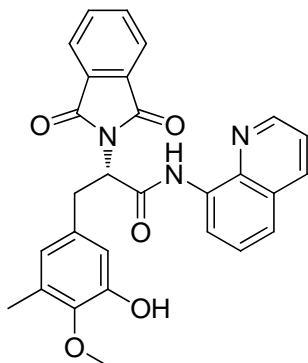

The compound **3ae** was prepared according to the **GP1** and purified by column chromatography in petroleum ether: dichloromethane: ethyl acetate = 4:3.5:2.5. **3ae** was obtained as a light yellow solid (75.4 mg, 78% of 0.2 mmol; 3.2410 g, 67% of 10 mmol).  $^1H$  NMR (400 MHz,  $CDCl_3$ )  $\delta$  10.27 (s, 1H), 8.71 (dd,  $J$  = 6.2, 2.0 Hz, 1H), 8.59 (d,  $J$  = 3.6 Hz, 1H), 8.07 (d,  $J$  = 8.2 Hz, 1H), 7.81 (dd,  $J$  = 5.0, 3.1 Hz, 2H), 7.67 (dd,  $J$  = 5.0, 3.1 Hz, 2H), 7.51 – 7.43 (m, 2H), 7.35 (dd,  $J$  = 8.1, 4.2 Hz, 1H), 6.77 (s, 1H), 6.62 (s, 1H), 5.91 (s, 1H), 5.41 (dd,  $J$  = 9.8, 6.5 Hz, 1H), 3.74 – 3.60 (m, 5H), 2.13 (s, 3H);  $^{13}C$  NMR (101 MHz,  $CDCl_3$ )  $\delta$  168.07, 166.60, 149.00, 148.34, 144.46, 138.43, 136.23, 134.20, 133.85, 133.09, 131.70, 131.11, 127.81, 127.24, 123.55, 123.05, 122.06, 121.66, 116.79, 114.03, 60.56, 56.30, 34.45, 15.78; HRMS (EI)  $m/z$ : 481.1635 ( $M^+$ ); calc. for  $C_{28}H_{23}N_3O_5$ : 481.1638.

## Application:

### 1. Cleavage of the 8-Aminoquinoline Directing Group

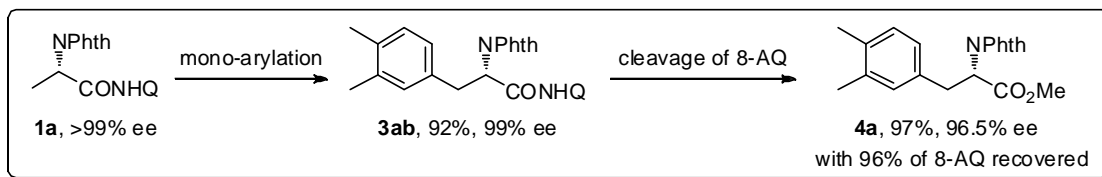

#### (S)-N-(3-(3,4-Dimethyl-phenyl)-2-phthalimidopropionyl)-8-aminoquinoline (**3ab**)

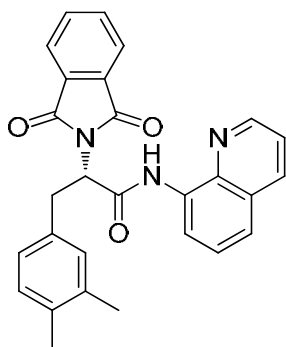

HPLC Chiralpack<sup>®</sup> AD-H column (*n*-hexane/isopropanol = 55:45, 0.70mL/min)  $t_r$  = 20.364 min (major),  $t_r$  = 27.017 min (minor): 99% ee.

#### (S)-Methyl-2-phthalimido-3-(3,4-dimethylphenyl)-propionate (**4a**)

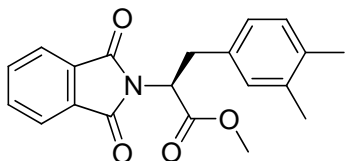

To a 30-mL resealable Schlenk flask was added 8-aminoquinoline amide (**3ab**, 67.4 mg, 0.15 mmol, overall concentration = 0.1 mol/L), dry methanol (1.5 mL),  $\text{BF}_3 \cdot \text{Et}_2\text{O}$  (114  $\mu\text{L}$ , 0.9 mmol). The flask was then charged with  $\text{N}_2$ . The mixture was stirred at 100°C for 20 hours under  $\text{N}_2$ . After cooling to room temperature, the reaction was diluted with dichloromethane (5 mL) and then quenched by  $\text{Et}_3\text{N}$  (0.21 mL, 1.50 mmol). Evaporation of organic solvent and purification by column chromatography in petroleum ether: dichloromethane: ethyl acetate = 9:3:1 gave the corresponding products **4a** (49.5 mg, 96%) as a colorless oil and 8-aminoquinoline (20.6mg, 96%).  $^1\text{H}$  NMR (400 MHz,  $\text{CDCl}_3$ )  $\delta$  7.79 (dd,  $J$  = 5.4, 3.1 Hz, 2H), 7.69 (dd,  $J$  = 5.4, 3.1 Hz, 2H), 6.93 (d,  $J$  = 7.6 Hz, 2H), 6.88 (d,  $J$  = 7.6 Hz, 1H), 5.14 (dd,  $J$  = 11.0, 5.4 Hz, 1H), 3.77 (s, 3H), 3.50 (qd,  $J$  = 14.4, 8.3 Hz, 2H), 2.13 (s, 3H), 2.11 (s, 3H);  $^{13}\text{C}$  NMR (101 MHz,  $\text{CDCl}_3$ )  $\delta$  169.62, 167.64, 136.78, 135.06, 134.16, 131.82, 130.25, 129.88, 126.20, 123.57, 53.54, 52.97, 34.28, 19.71, 19.43. HRMS (ESI)  $m/z$ : 338.1386 ( $\text{MH}^+$ ); calc. for  $\text{C}_{20}\text{H}_{19}\text{NO}_4$   $^+$ : 338.1387. HPLC Chiralpack<sup>®</sup> OJ-H column (*n*-hexane/isopropanol = 80:20, 1.0mL/min)  $t_r$  = 10.957 min (major),  $t_r$  = 15.364 (minor): 96.5% ee.



## 2. Sequential Reaction for C-C and C-O Coupling

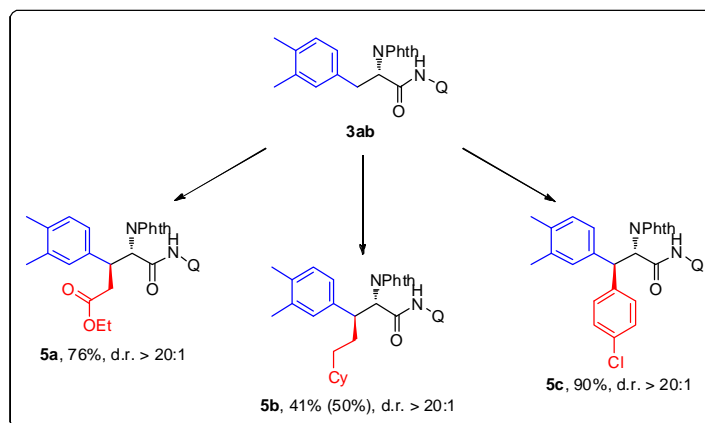

### 2*S*,3*S*-*N*-(3-(3,4-Dimethylphenyl)-5-ethoxy-5-oxo-2-phthalimidopentanoyl)-8-aminoquinoline (**5a**)

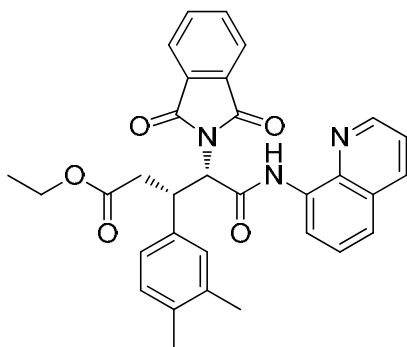

To a 30-mL resealable Schlenk flask was added **3ab** (89.9 mg, 0.2 mmol), Pd(OAc)<sub>2</sub> (4.5 mg, 0.02 mmol, 10 mol%), BrCH<sub>2</sub>CO<sub>2</sub>Et (33  $\mu$ L, 0.3 mmol, 2.0 eq), Ag<sub>2</sub>CO<sub>3</sub> (66.2 mg, 0.24 mmol, 1.2 eq), (BnO)<sub>2</sub>PO<sub>2</sub>H (16.7 mg, 0.06 mmol, 30 mol%), and *t*BuOH + DCE (1.2 mL + 0.3 mL). The Schlenk flask was charged with 1 atm of N<sub>2</sub>. The mixture was stirred at 90°C for 12 hours. After cooling to room temperature, the reaction was diluted with dichloromethane (15 mL), then filtered through a pad of Celite and washed by dichloromethane (10 mL). The filtrate was washed by water (15 mL), and the aqueous phase was extracted with dichloromethane (2  $\times$  10 mL). The combined organic phase was then washed by brine (20 mL), and dried over anhydrous MgSO<sub>4</sub>. Evaporation of organic solvent and purification by column chromatography in petroleum ether: dichloromethane: ethyl acetate = 5:4:1 gave the corresponding product. **5a** was obtained as a white solid (81.8mg, 76% with diastereoselectivity(d.r.) > 20:1 estimated by <sup>1</sup>H NMR). <sup>1</sup>H NMR (400 MHz, CDCl<sub>3</sub>)  $\delta$  10.67 (s, 1H), 8.84 – 8.67 (m, 2H), 8.08 (dd, *J* = 8.3, 1.7 Hz, 1H), 7.68 (dd, *J* = 5.5, 3.0 Hz, 2H), 7.56 (dd, *J* = 5.5, 3.0 Hz, 2H), 7.51 – 7.44 (m, 2H), 7.38 (dd, *J* = 8.3, 4.2 Hz, 1H), 7.00 (d, *J* = 9.6 Hz, 2H), 6.88 (d, *J* = 7.6 Hz, 1H), 5.40 (d, *J* = 11.8 Hz, 1H), 4.69 (ddd, *J* = 11.7, 10.3, 4.1 Hz, 1H), 4.05 – 3.84 (m, 2H), 3.13 (dd, *J* = 15.4, 4.1 Hz, 1H), 2.85 (dd, *J* = 15.4, 10.1 Hz, 1H), 2.06 (s, 3H), 2.01 (s, 3H), 1.07 (t, *J* = 7.1 Hz, 3H); <sup>13</sup>C NMR (101 MHz, CDCl<sub>3</sub>)  $\delta$  171.11, 167.67, 166.42, 148.58, 138.67, 136.41, 136.25, 136.17, 135.40, 134.20, 134.05, 131.30, 129.66, 129.45, 127.89, 127.16, 125.37, 123.37, 122.24,

121.69, 117.14, 60.44, 59.50, 40.33, 39.44, 19.62, 19.29, 14.05; HRMS (EI)  $m/z$ : 535.2113 ( $M^+$ ); calc. for  $C_{26}H_{23}N_3O_7$ : 535.2107.

**2*S*,3*S*-*N*-(5-Cyclohexyl-3-(3,4-dimethylphenyl)-2-phthalimidopentanoyl)-8-aminoquinoline (5b)**

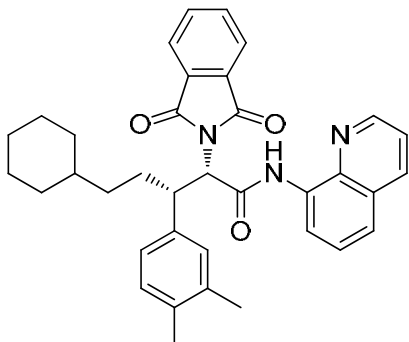

To a 30-mL resealable Schlenk flask was added **3ab** (89.9 mg, 0.2 mmol),  $Pd(OAc)_2$  (4.5 mg, 0.02 mmol, 10 mol%),  $CyCH_2CH_2I$  (95.2 mg, 0.4 mmol, 2.0 eq),  $Ag_2CO_3$  (82.7 mg, 0.3 mmol, 1.5 eq),  $p-ClC_6H_4SO_2NH_2$  (11.5 mg, 0.06 mmol, 30 mol%),  $NaOCN$  (26.1 mg, 0.4 mmol, 2.0 eq), and 1,4-dioxane (2.0 mL). The Schlenk flask was charged with 1 atm of  $N_2$ . The mixture was stirred at 80°C for 20 hours. After cooling to room temperature, the reaction was diluted with dichloromethane (15 mL), then filtered through a pad of Celite and washed by dichloromethane (10 mL). The filtrate was washed by water (15 mL), and the aqueous phase was extracted with dichloromethane ( $2 \times 10$  mL). The combined organic phase was then washed by brine (20 mL), and dried over anhydrous  $MgSO_4$ . Evaporation of organic solvent and purification by column chromatography in petroleum ether: dichloromethane: ethyl acetate = 7:2:1 gave the corresponding product. **5b** was obtained as a light yellow oil (46.0 mg, 41% with diastereoselectivity(d.r.) > 20:1 estimated by  $^1H$  NMR) with **3ab** (45.2 mg, 50%) recovered.  $^1H$  NMR (400 MHz,  $CDCl_3$ )  $\delta$  10.77 (s, 1H), 8.90 (dd,  $J = 4.2, 1.6$  Hz, 1H), 8.81 (dd,  $J = 5.8, 3.2$  Hz, 1H), 8.14 (dd,  $J = 8.3, 1.6$  Hz, 1H), 7.69 (dd,  $J = 5.4, 3.1$  Hz, 2H), 7.58 (dd,  $J = 5.5, 3.0$  Hz, 2H), 7.54 – 7.49 (m, 2H), 7.45 (dd,  $J = 8.3, 4.2$  Hz, 1H), 6.98 – 6.91 (m, 2H), 6.89 (d,  $J = 7.5$  Hz, 1H), 5.17 (d,  $J = 11.8$  Hz, 1H), 4.08 (td,  $J = 11.6, 3.2$  Hz, 1H), 2.08 (s, 3H), 2.05 (s, 3H), 2.03 – 1.96 (m, 1H), 1.80 – 1.71 (m, 1H), 1.63 – 1.43 (m, 6H), 1.20 – 1.08 (m, 3H), 1.04 – 0.92 (m, 3H), 0.79 – 0.59 (m, 2H);  $^{13}C$  NMR (101 MHz,  $CDCl_3$ )  $\delta$  167.95, 167.05, 148.72, 138.94, 137.50, 136.37, 136.28, 134.90, 134.56, 133.98, 131.50, 130.42, 129.65, 129.57, 128.06, 127.79, 127.37, 125.55, 123.39, 122.16, 121.74, 117.31, 61.92, 44.21, 37.52, 35.01, 33.73, 32.81, 31.27, 26.74, 26.49, 26.33, 19.75, 19.40; HRMS (EI)  $m/z$ : 559.2829 ( $M^+$ ); calc. for  $C_{26}H_{23}N_3O_7$ : 559.2835.

**2*S*,3*S*-*N*-(3-(4-Chlorophenyl)-3-(3,4-dimethylphenyl)-2-phthalimidopropanoyl)-8-aminoquinoline (5c)**

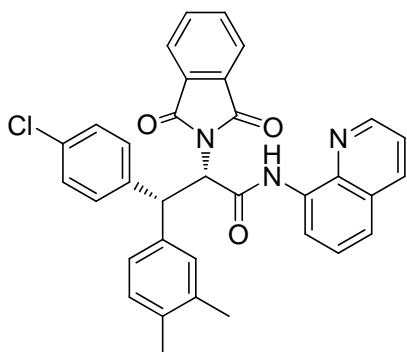

To a 30-mL resealable Schlenk flask was added **3ab** (80.3 mg, 0.2 mmol), Pd(OAc)<sub>2</sub> (4.5 mg, 0.02 mmol, 10 mol%), *p*-ClC<sub>6</sub>H<sub>4</sub>I (71.5 mg, 0.3 mmol, 1.5 eq), AgOAc (50.1 mg, 0.3 mmol, 1.5 eq), and *t*BuOH + DCE (1.2 mL + 0.3 mL). The Schlenk flask was charged with 1 atm of N<sub>2</sub>. The mixture was stirred at 90°C for 12 hours. After cooling to room temperature, the reaction was diluted with dichloromethane (15 mL), then filtered through a pad of Celite and washed by dichloromethane (10 mL). The filtrate was washed by water (15 mL), and the aqueous phase was extracted with dichloromethane (2 × 10 mL). The combined organic phase was then washed by brine (20 mL), and dried over anhydrous MgSO<sub>4</sub>. Evaporation of organic solvent and purification by column chromatography in petroleum ether: dichloromethane: ethyl acetate = 6:3:1 gave the corresponding product. **5c** was obtained as a white solid (101.2 mg, 90% with diastereoselectivity(d.r.) > 20:1 estimated by <sup>1</sup>H NMR). <sup>1</sup>H NMR (400 MHz, CDCl<sub>3</sub>) δ 10.12 (s, 1H), 8.69 (dd, *J* = 4.2, 1.5 Hz, 1H), 8.62 (dd, *J* = 6.0, 2.9 Hz, 1H), 8.03 (d, *J* = 8.3 Hz, 1H), 7.72 (dd, *J* = 5.3, 3.1 Hz, 2H), 7.61 – 7.49 (m, 4H), 7.44 – 7.37 (m, 2H), 7.36 (dd, *J* = 8.2, 4.1 Hz, 1H), 7.26 – 7.20 (m, 2H), 7.13 – 7.05 (m, 2H), 6.95 – 6.88 (m, 1H), 5.92 (d, *J* = 12.4 Hz, 1H), 5.58 (d, *J* = 12.4 Hz, 1H), 2.08 (s, 3H), 2.03 (s, 3H); <sup>13</sup>C NMR (101 MHz, CDCl<sub>3</sub>) δ 167.93, 165.61, 148.26, 139.78, 138.42, 137.76, 136.99, 136.10, 135.41, 134.06, 133.98, 133.07, 131.50, 130.03, 129.57, 129.40, 129.19, 127.77, 127.13, 124.70, 123.50, 122.10, 121.65, 116.93, 58.79, 49.34, 19.79, 19.29; HRMS (EI) *m/z*: 559.1659 (M<sup>+</sup>); calc. for C<sub>26</sub>H<sub>23</sub>N<sub>3</sub>O<sub>7</sub>: 559.1663.

## Chiral HPLC Data

### DL-/L-1a

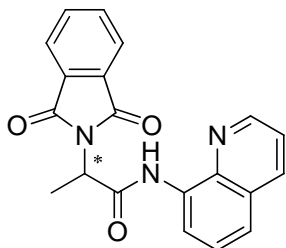

Chiral stationary phase: Chiralpack<sup>®</sup> AD-H, *n*-hexane/isopropanol = 55:45, 0.70mL/min

Signal: VWD1 A, Wavelength = 220 nm

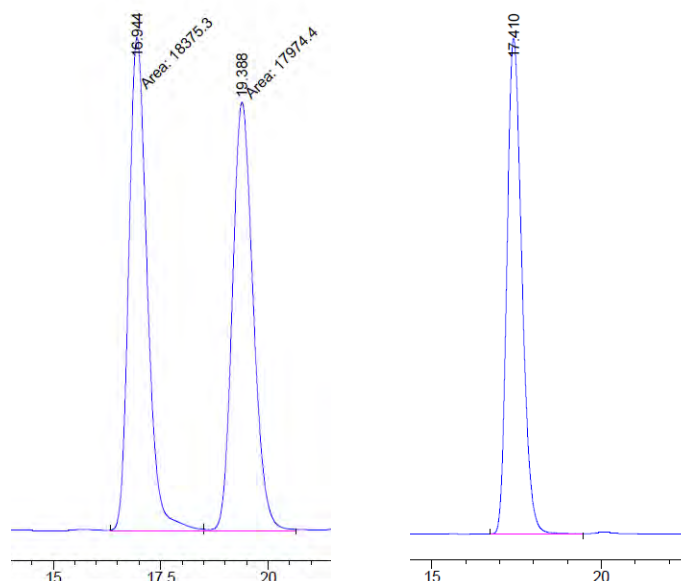

#### Area% report for DL-1a:

| Retention Time (min) | Area (mAU*s) | Area % | Height (mAU) | Height % |
|----------------------|--------------|--------|--------------|----------|
| 16.944               | 18375.3      | 50.55  | 615.896      | 53.54    |
| 19.388               | 17974.4      | 49.45  | 534.457      | 46.46    |
| Totals               | 36349.7      | 100.00 | 1150.353     | 100.00   |

#### Area% report for L-1a:

| Retention Time (min) | Area (mAU*s) | Area % | Height (mAU) | Height % |
|----------------------|--------------|--------|--------------|----------|
| 17.410               | 66352.8      | 100.00 | 2165.161     | 100.00   |
| Totals               | 36349.7      | 100.00 | 1150.353     | 100.00   |

**DL-/L-3a**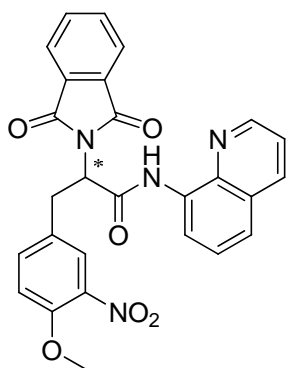

Chiral stationary phase: Chiralpack<sup>®</sup> AD, *n*-hexane/isopropanol = 55:45, 1.25mL/min

Signal: VWD1 A, Wavelength = 220 nm

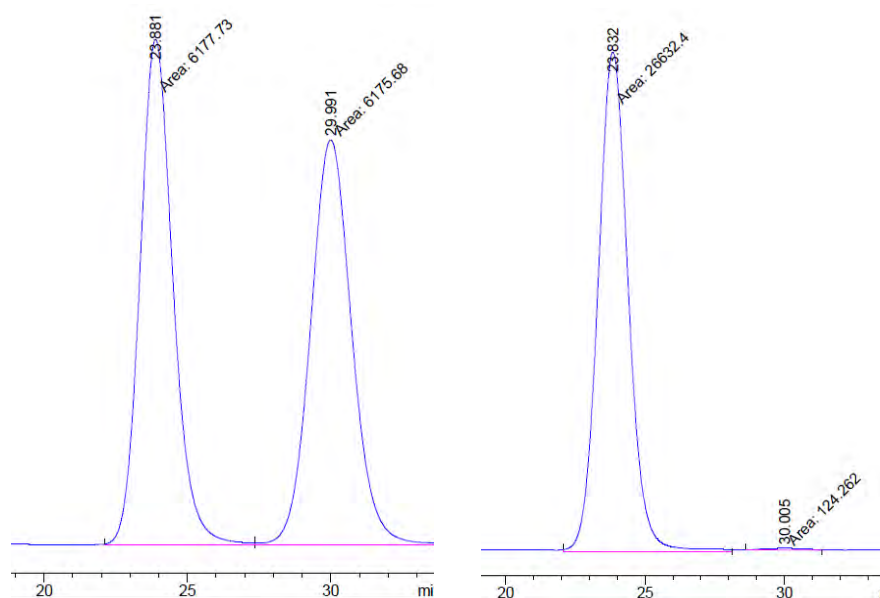**Area% report for DL-3a:**

| Retention Time (min) | Area (mAU*s) | Area % | Height (mAU) | Height % |
|----------------------|--------------|--------|--------------|----------|
| 23.811               | 6177.7       | 50.01  | 76.754       | 55.52    |
| 29.991               | 6175.7       | 49.99  | 61.492       | 44.48    |
| Totals               | 12353.4      | 100.00 | 138.246      | 100.00   |

**Area% report for L-3a:**

| Retention Time (min) | Area (mAU*s) | Area % | Height (mAU) | Height % |
|----------------------|--------------|--------|--------------|----------|
| 23.832               | 26632.4      | 99.54  | 353.663      | 99.66    |
| 30.005               | 124.3        | 0.46   | 1.210        | 0.34     |
| Totals               | 26756.7      | 100.00 | 354.873      | 100.00   |

**DL-/L-3b**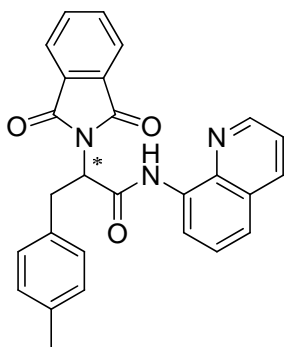

Chiral stationary phase: Chiralpack<sup>®</sup> AD-H, *n*-hexane/isopropanol = 55:45, 0.70mL/min

Signal: VWD1 A, Wavelength = 220 nm

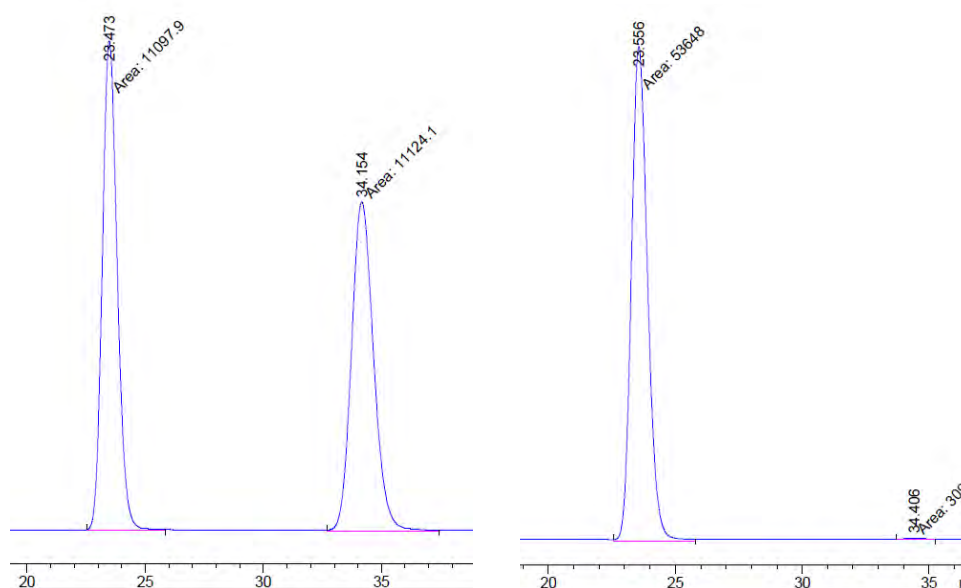**Area% report for DL-3b:**

| Retention Time (min) | Area (mAU*s) | Area % | Height (mAU) | Height % |
|----------------------|--------------|--------|--------------|----------|
| 23.473               | 11097.9      | 49.94  | 252.102      | 59.75    |
| 34.154               | 11124.1      | 50.06  | 169.822      | 40.25    |
| Totals               | 22222.0      | 100.00 | 421.924      | 100.00   |

**Area% report for L-3b:**

| Retention Time (min) | Area (mAU*s) | Area % | Height (mAU) | Height % |
|----------------------|--------------|--------|--------------|----------|
| 23.556               | 53648.0      | 99.43  | 1207.898     | 99.57    |
| 34.406               | 309.7        | 0.57   | 5.213        | 0.43     |
| Totals               | 53957.7      | 100.00 | 1213.111     | 100.00   |

**DL-/L-3r**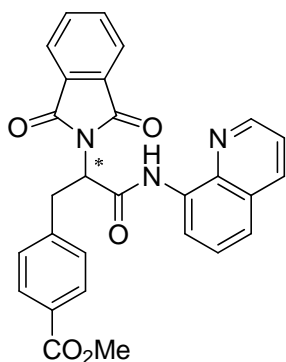

Chiral stationary phase: Chiralpack<sup>®</sup> AD, *n*-hexane/isopropanol = 55:45, 1.25mL/min

Signal: VWD1 A, Wavelength = 220 nm

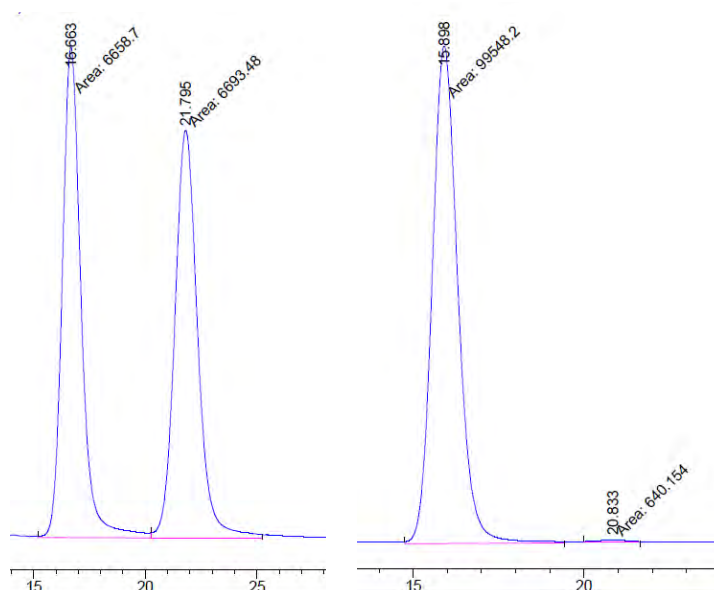**Area% report for DL-3r:**

| Retention Time (min) | Area (mAU*s) | Area % | Height (mAU) | Height % |
|----------------------|--------------|--------|--------------|----------|
| 16.663               | 6658.7       | 49.87  | 113.435      | 54.61    |
| 21.795               | 6693.5       | 50.13  | 94.298       | 45.39    |
| Totals               | 13352.2      | 100.00 | 207.733      | 100.00   |

**Area% report for L-3r:**

| Retention Time (min) | Area (mAU*s) | Area % | Height (mAU) | Height % |
|----------------------|--------------|--------|--------------|----------|
| 15.898               | 99548.2      | 99.36  | 1904.991     | 99.45    |
| 20.833               | 640.2        | 0.64   | 10.489       | 0.55     |
| Totals               | 100188.4     | 100.00 | 1915.481     | 100.00   |

**DL-/L-3ab**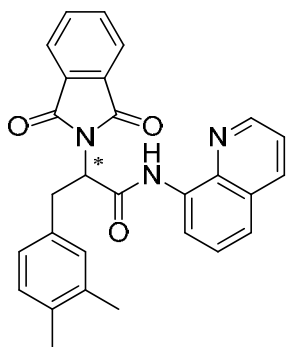

Chiral stationary phase: Chiralpack<sup>®</sup> AD-H, *n*-hexane/isopropanol = 55:45, 0.70mL/min

Signal: VWD1 A, Wavelength = 220 nm

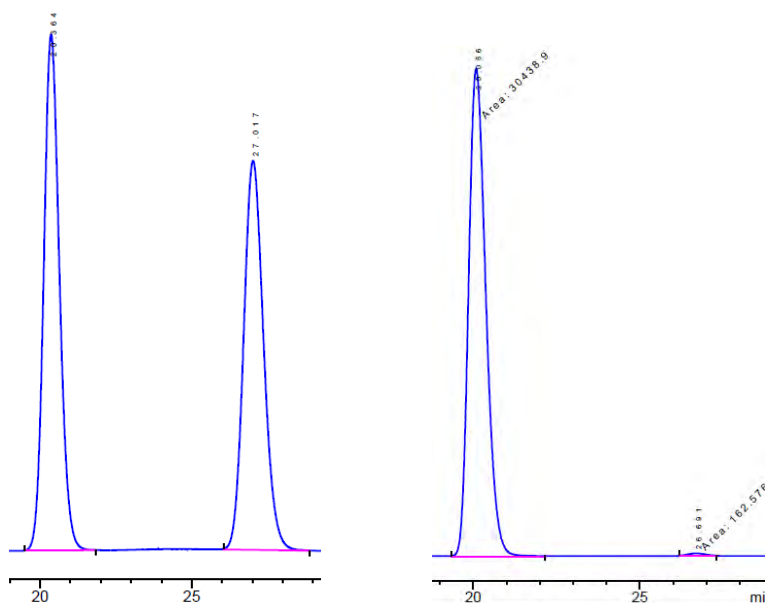**Area% report for DL-3ab:**

| Retention Time (min) | Area (mAU*s) | Area % | Height (mAU) | Height % |
|----------------------|--------------|--------|--------------|----------|
| 20.364               | 1088.39      | 51.13  | 30.278       | 57.01    |
| 27.017               | 1040.22      | 48.87  | 22.832       | 42.99    |
| Totals               | 2128.61      | 100.00 | 53.11        | 100.00   |

**Area% report for L-3ab:**

| Retention Time (min) | Area (mAU*s) | Area % | Height (mAU) | Height % |
|----------------------|--------------|--------|--------------|----------|
| 20.086               | 30438.9      | 99.47  | 847.23       | 99.51    |
| 26.691               | 162.6        | 0.53   | 4.17         | 0.49     |
| Totals               | 30601.5      | 100.00 | 851.40       | 100.00   |



**DL-/L-4a**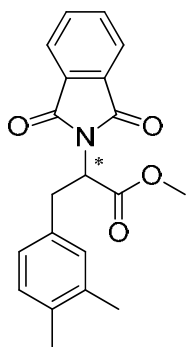

Chiral stationary phase: Chiralpack® OJ-H, *n*-hexane/isopropanol = 80:20, 1.0mL/min

Signal: VWD1 A, Wavelength = 220 nm

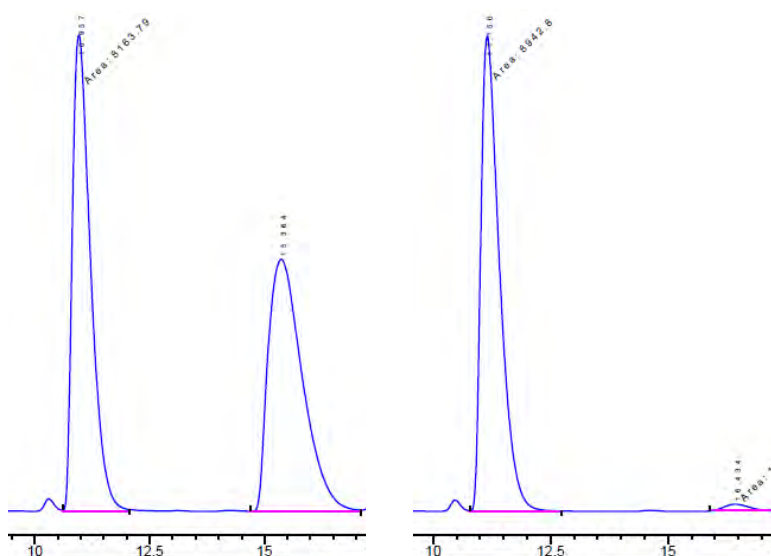**Area% report for DL-6a:**

| Retention Time (min) | Area (mAU*s) | Area % | Height (mAU) | Height % |
|----------------------|--------------|--------|--------------|----------|
| 10.957               | 8163.79      | 50.10  | 296.82       | 65.39    |
| 15.364               | 8130.71      | 49.90  | 157.09       | 34.61    |
| Totals               | 16294.5      | 100.00 | 453.91       | 100.00   |

**Area% report for L-6a:**

| Retention Time (min) | Area (mAU*s) | Area % | Height (mAU) | Height % |
|----------------------|--------------|--------|--------------|----------|
| 11.150               | 8942.80      | 98.22  | 321.49       | 98.64    |
| 16.434               | 162.39       | 1.78   | 4.42         | 1.36     |
| Totals               | 9105.19      | 100.00 | 325.92       | 100.00   |

## References

1. Chen, K.; Hu, F.; Zhang, S.Q.; Shi, B.F. *Chem. Sci.*, **2013**, *4*, 3906.

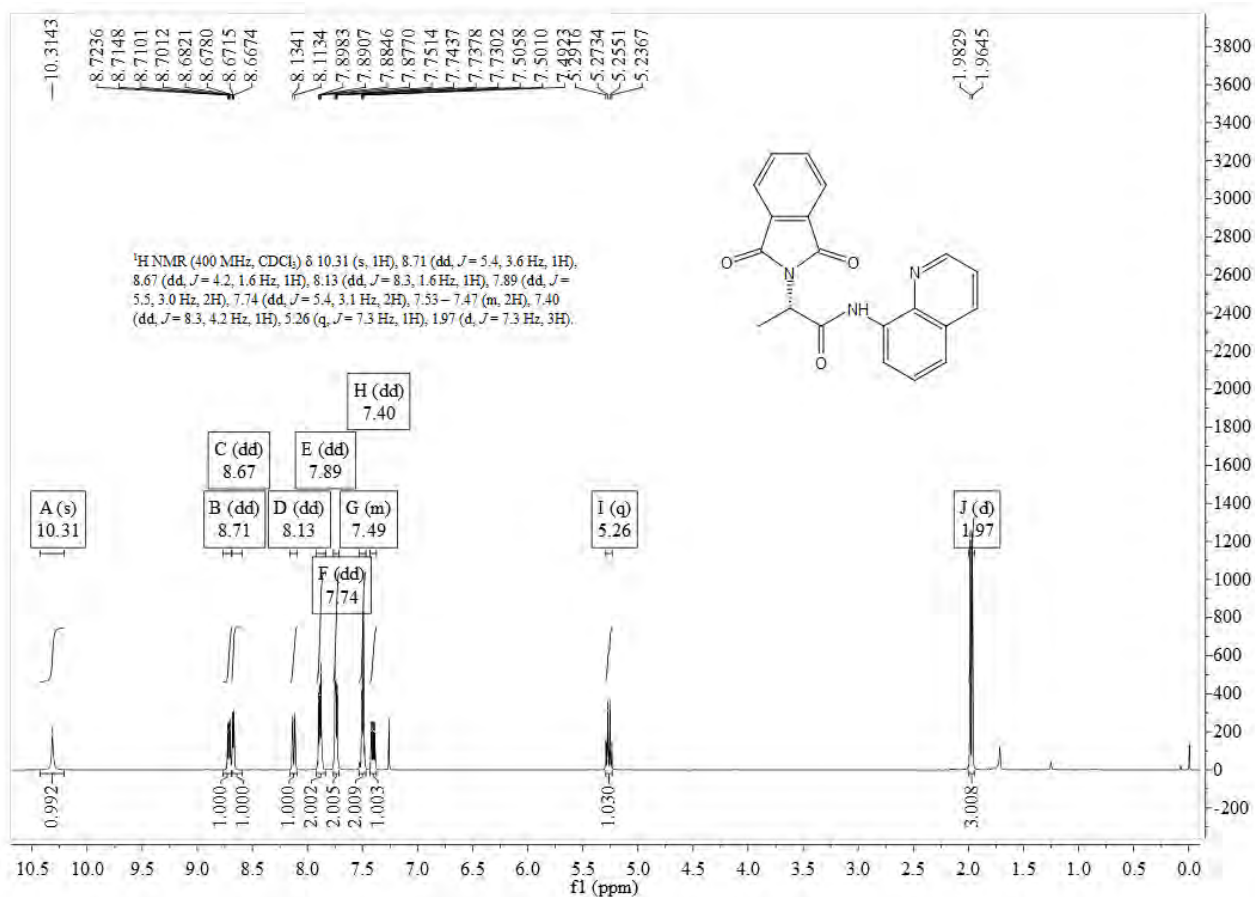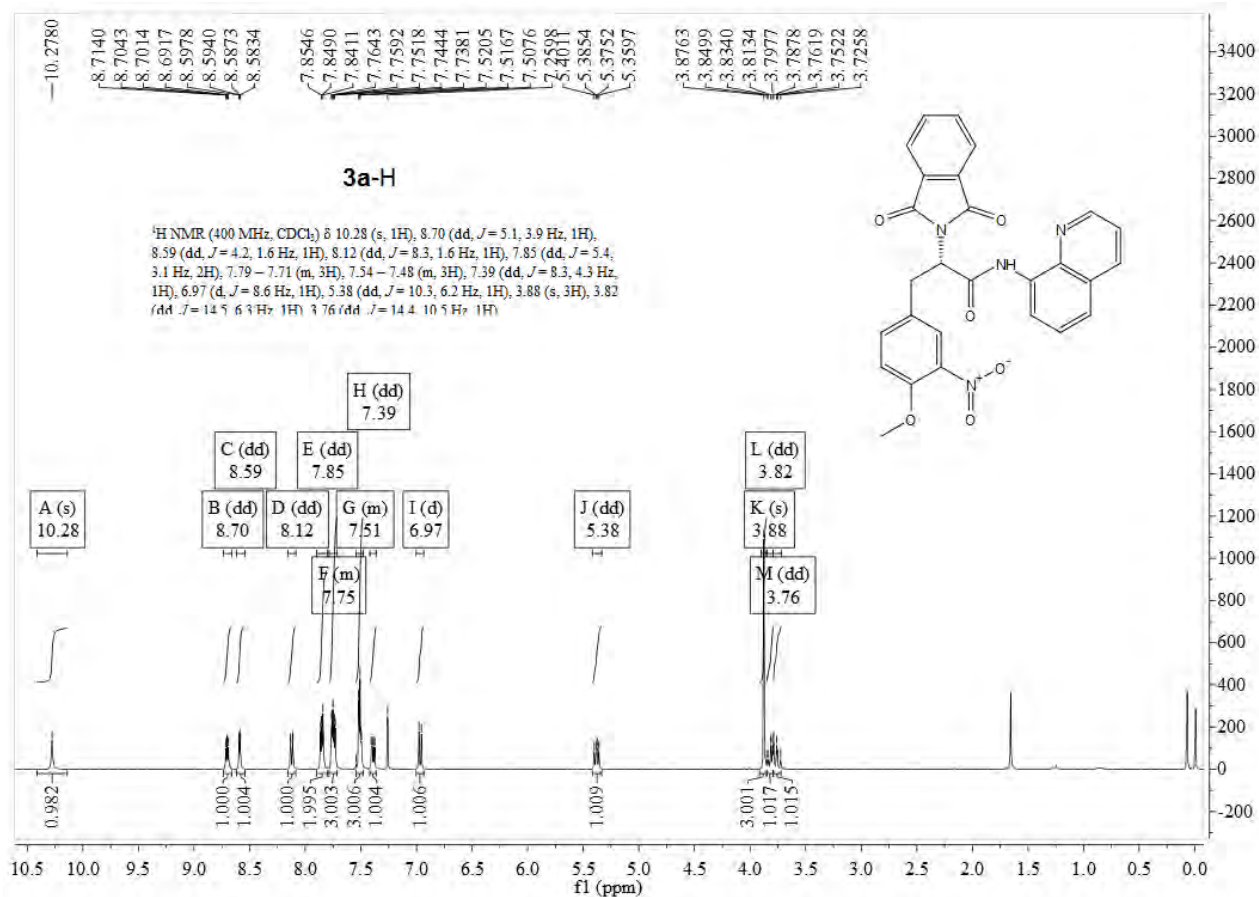

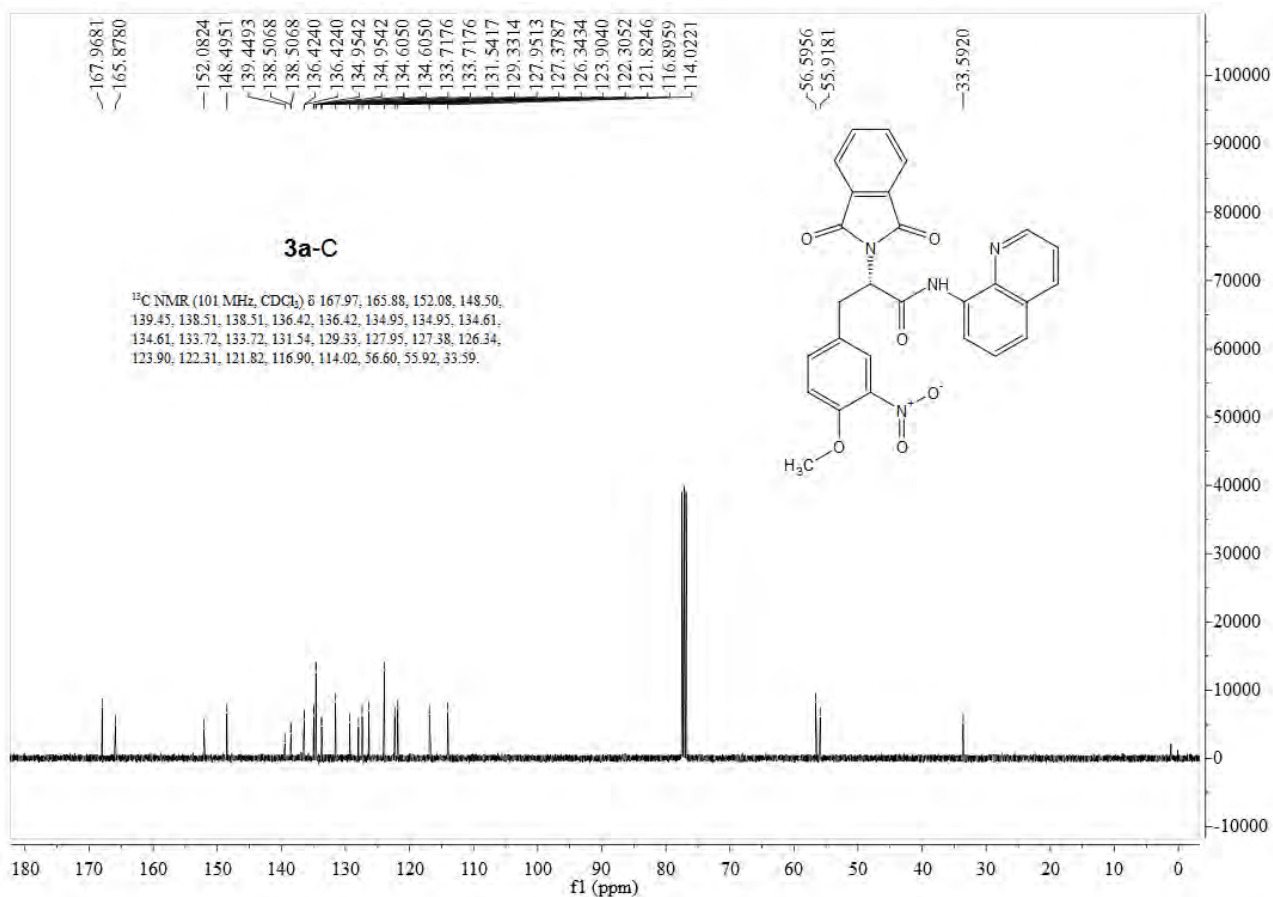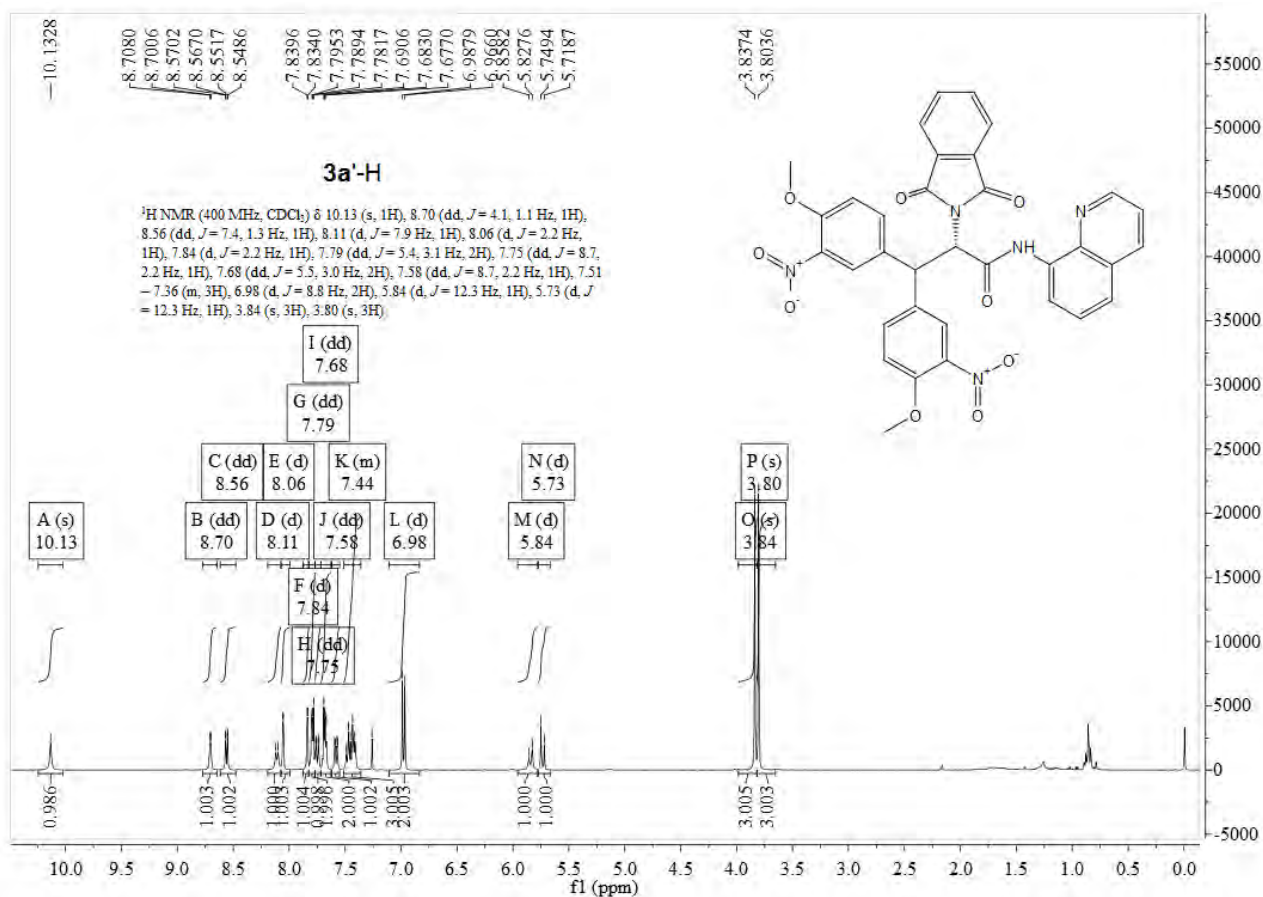

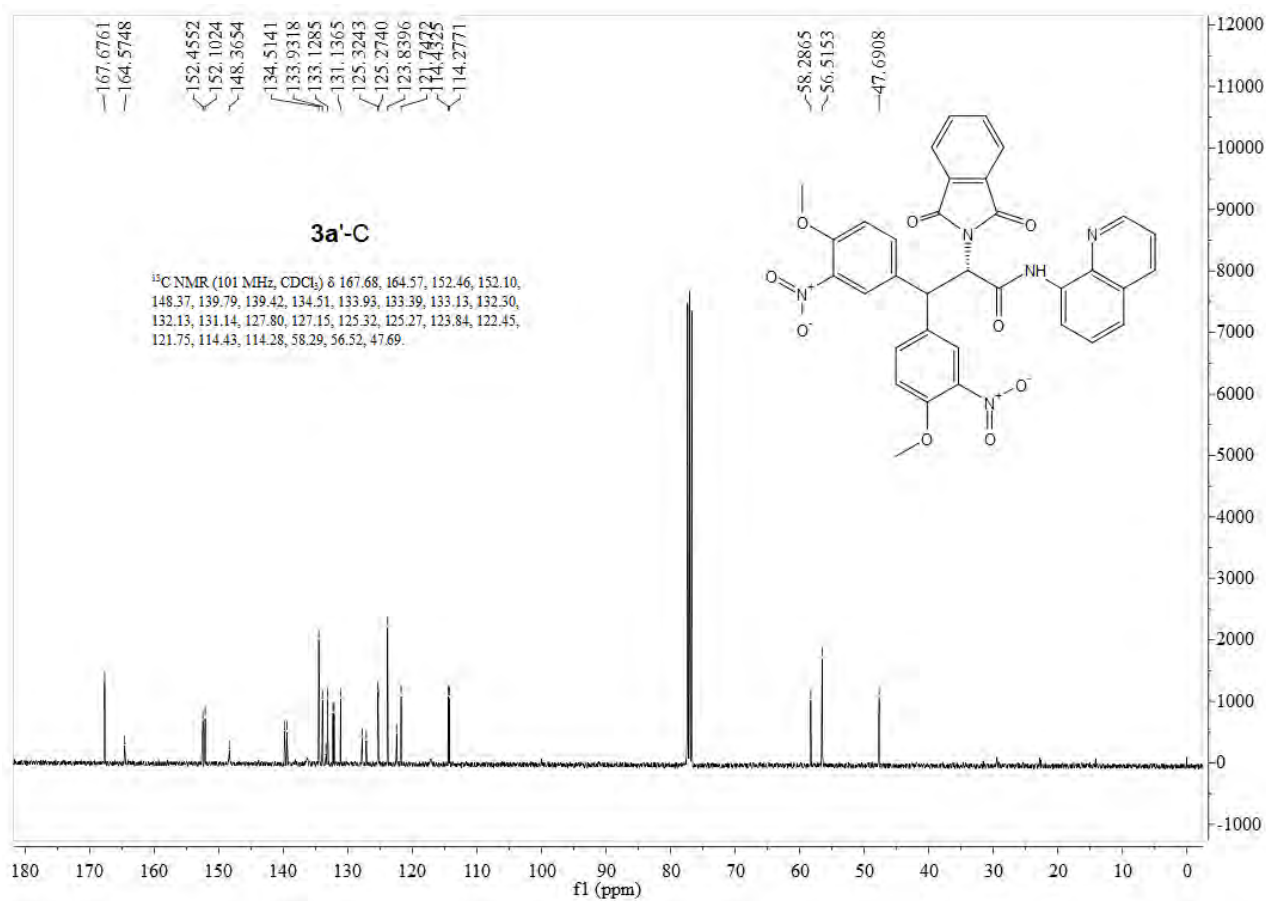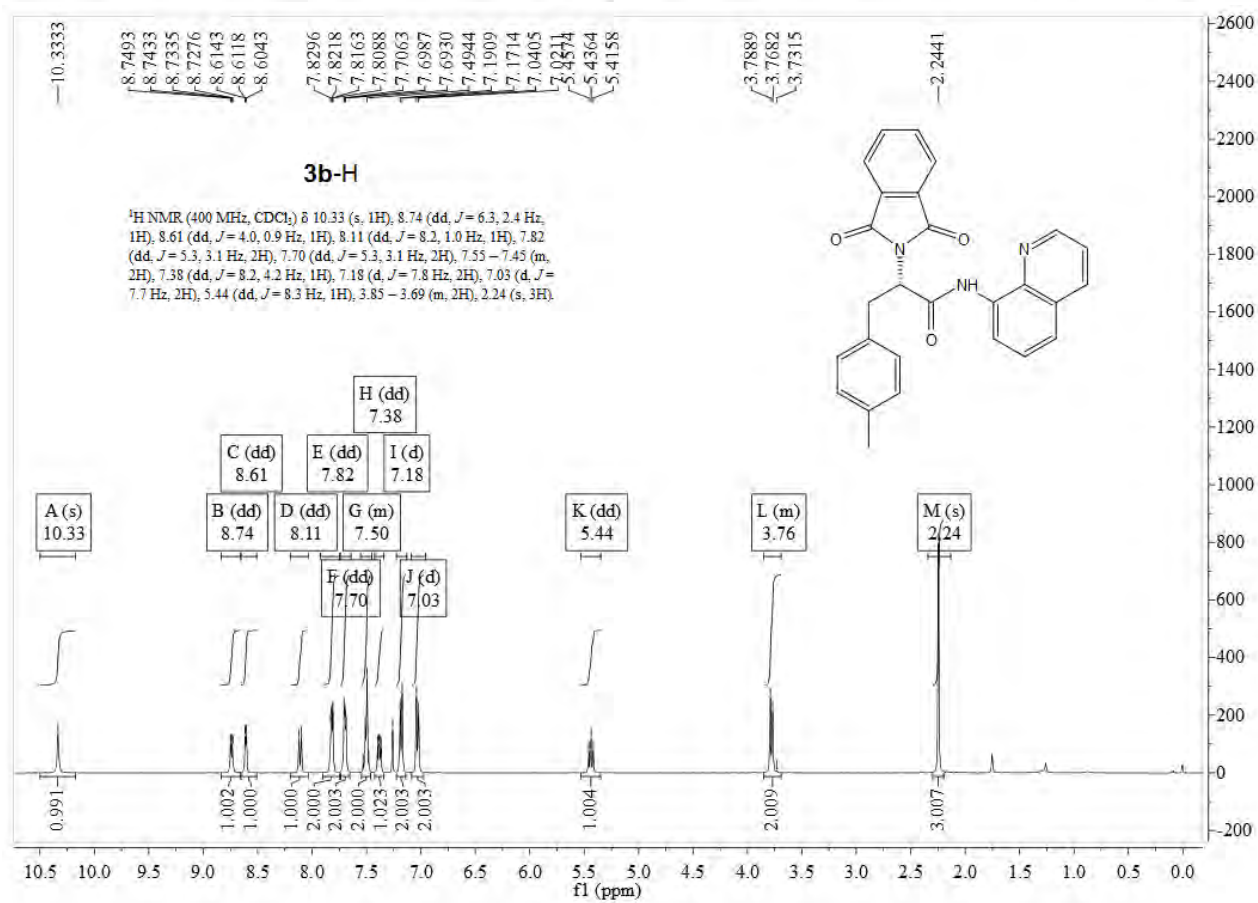



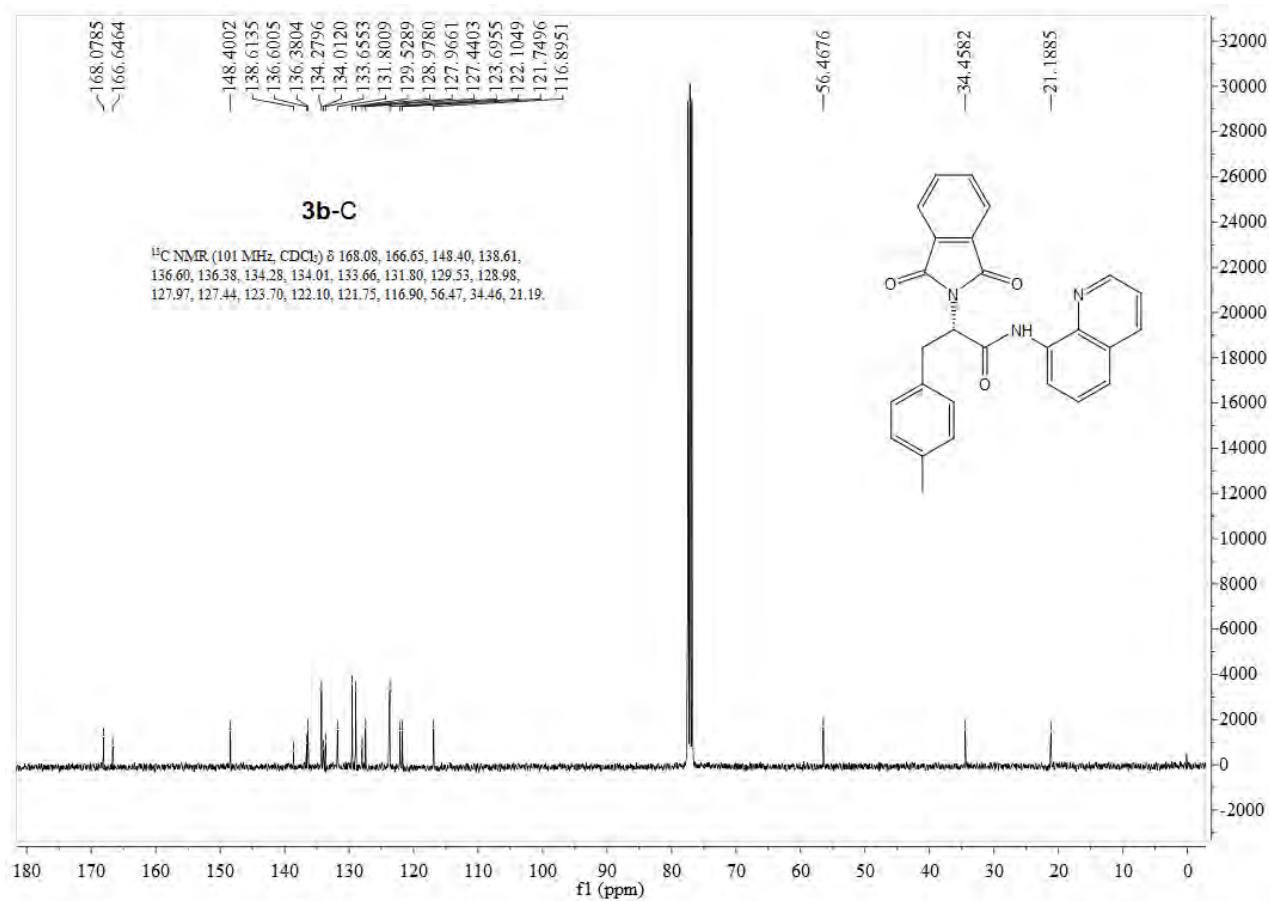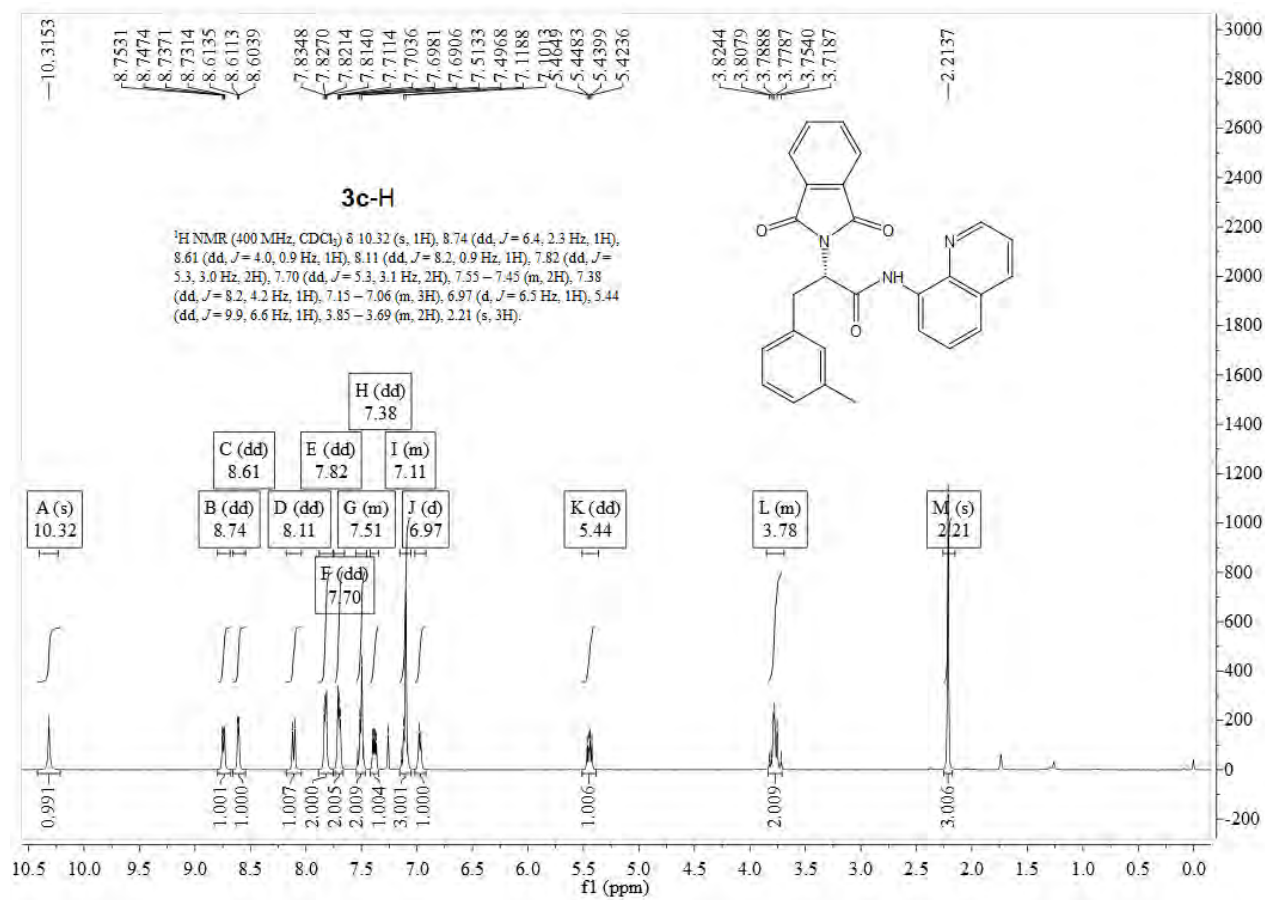

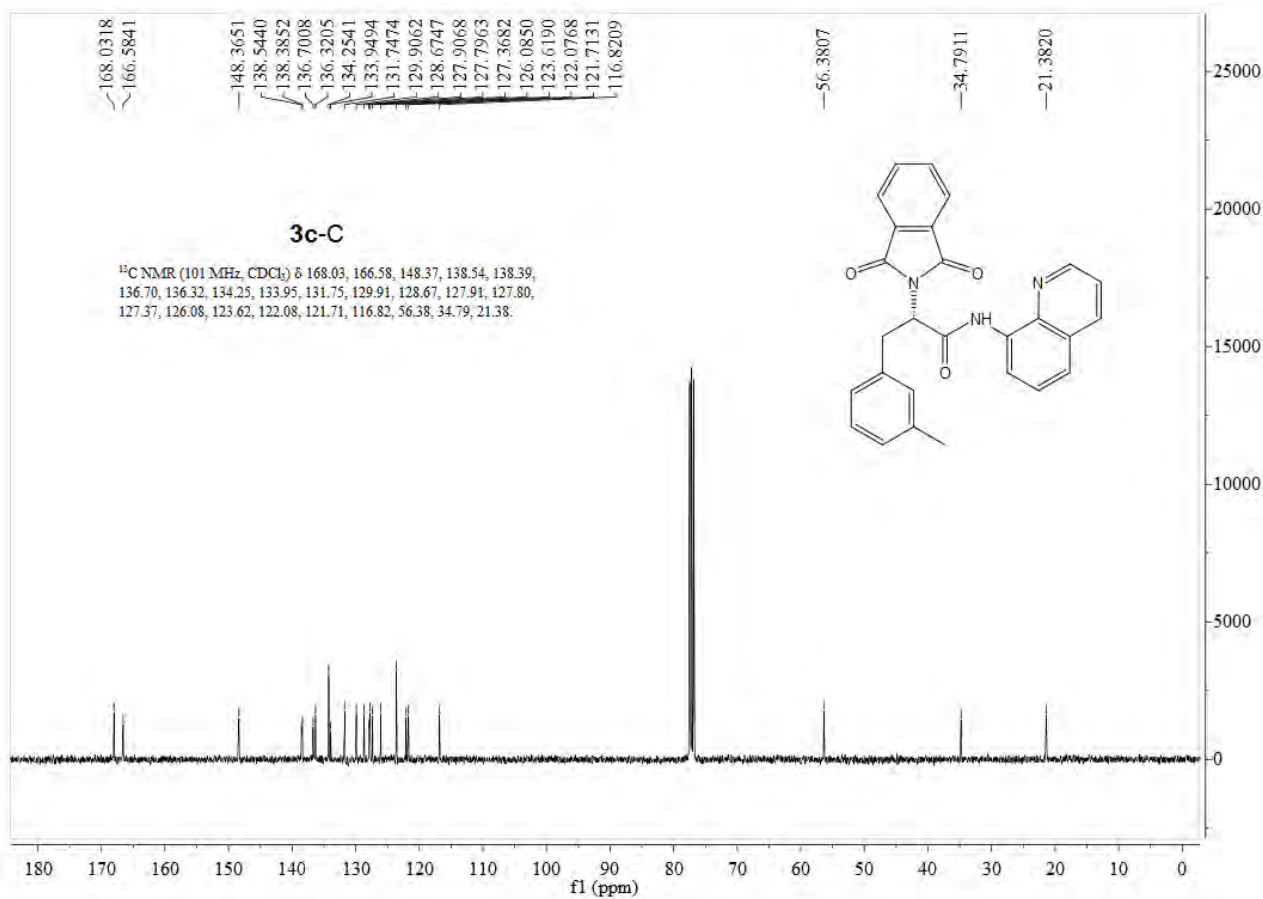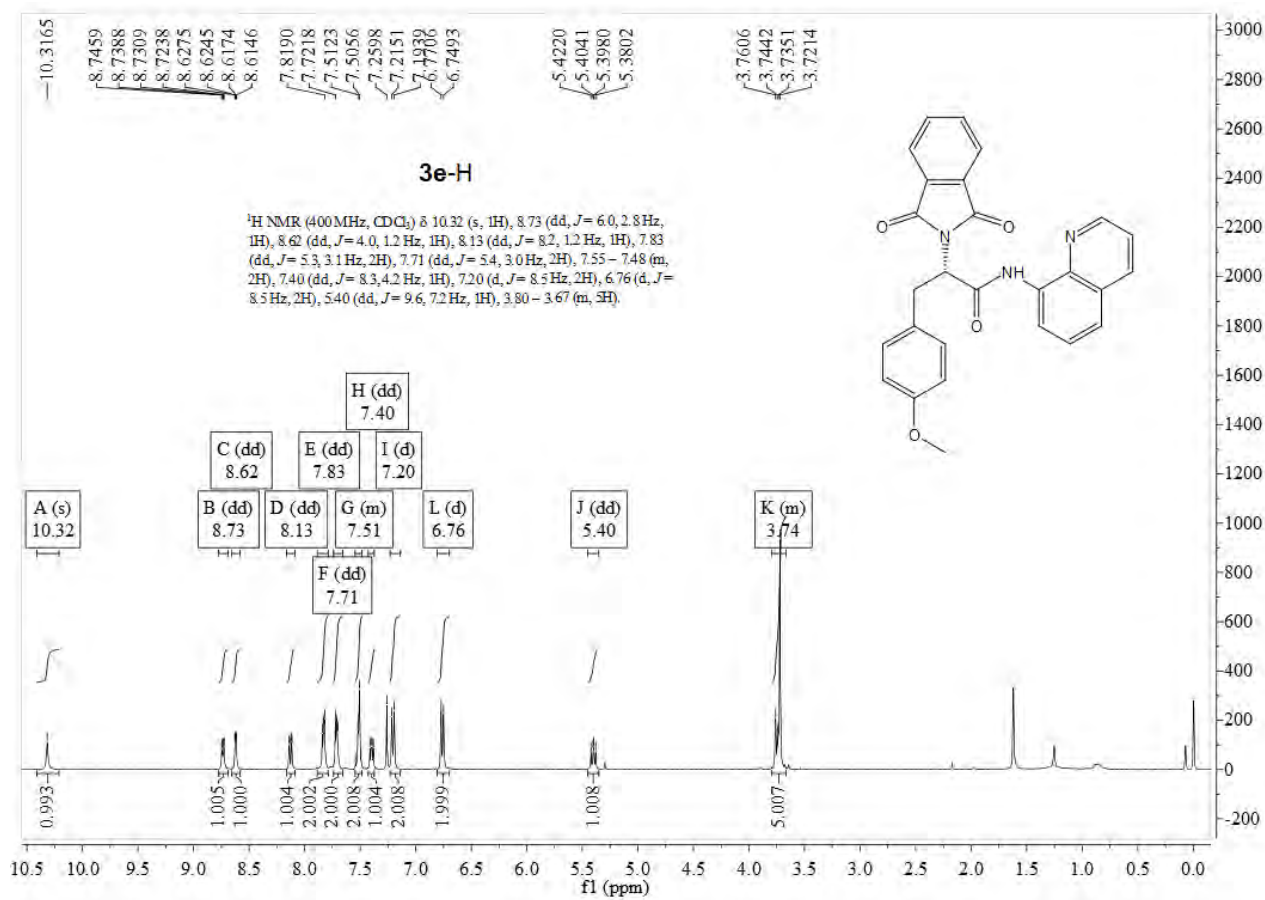

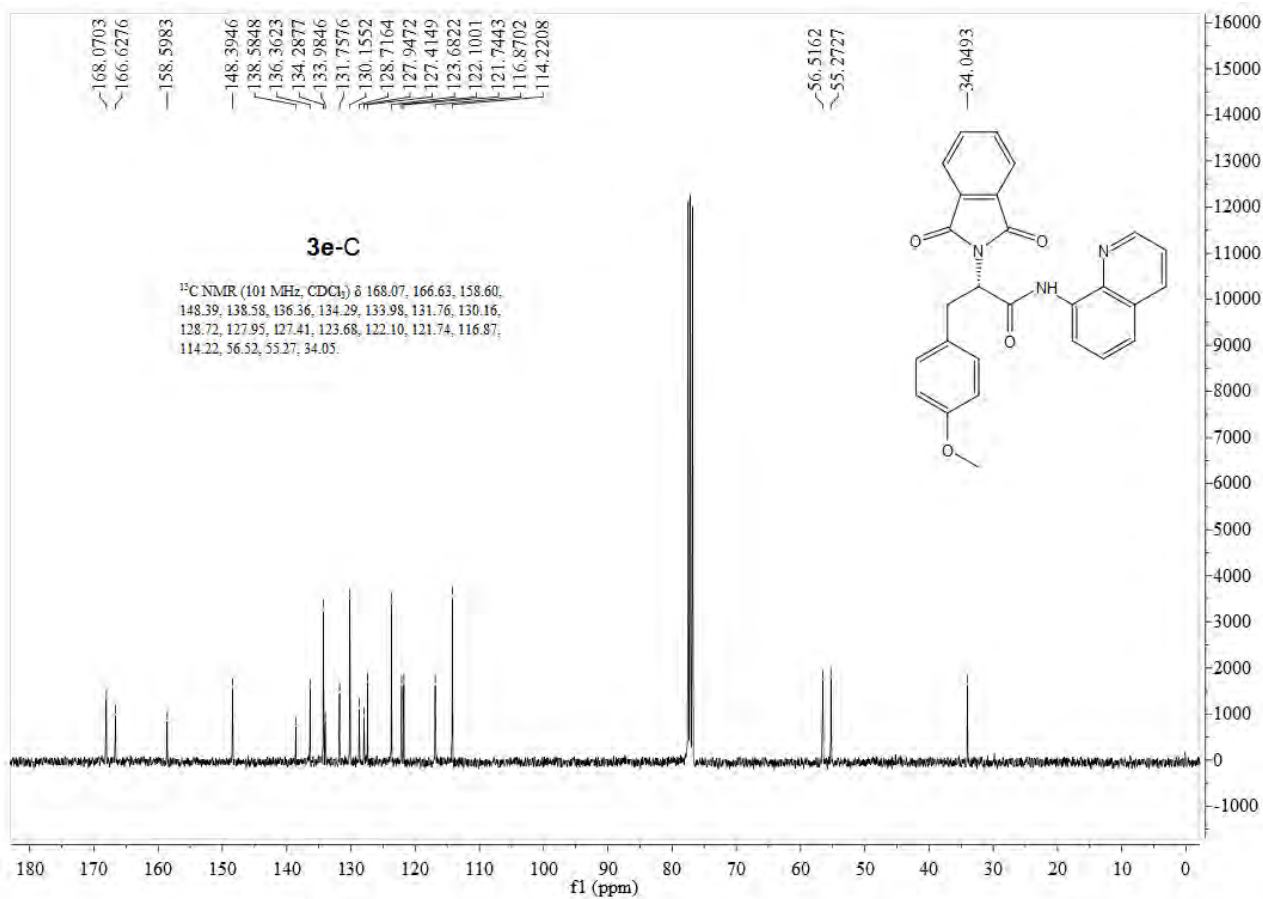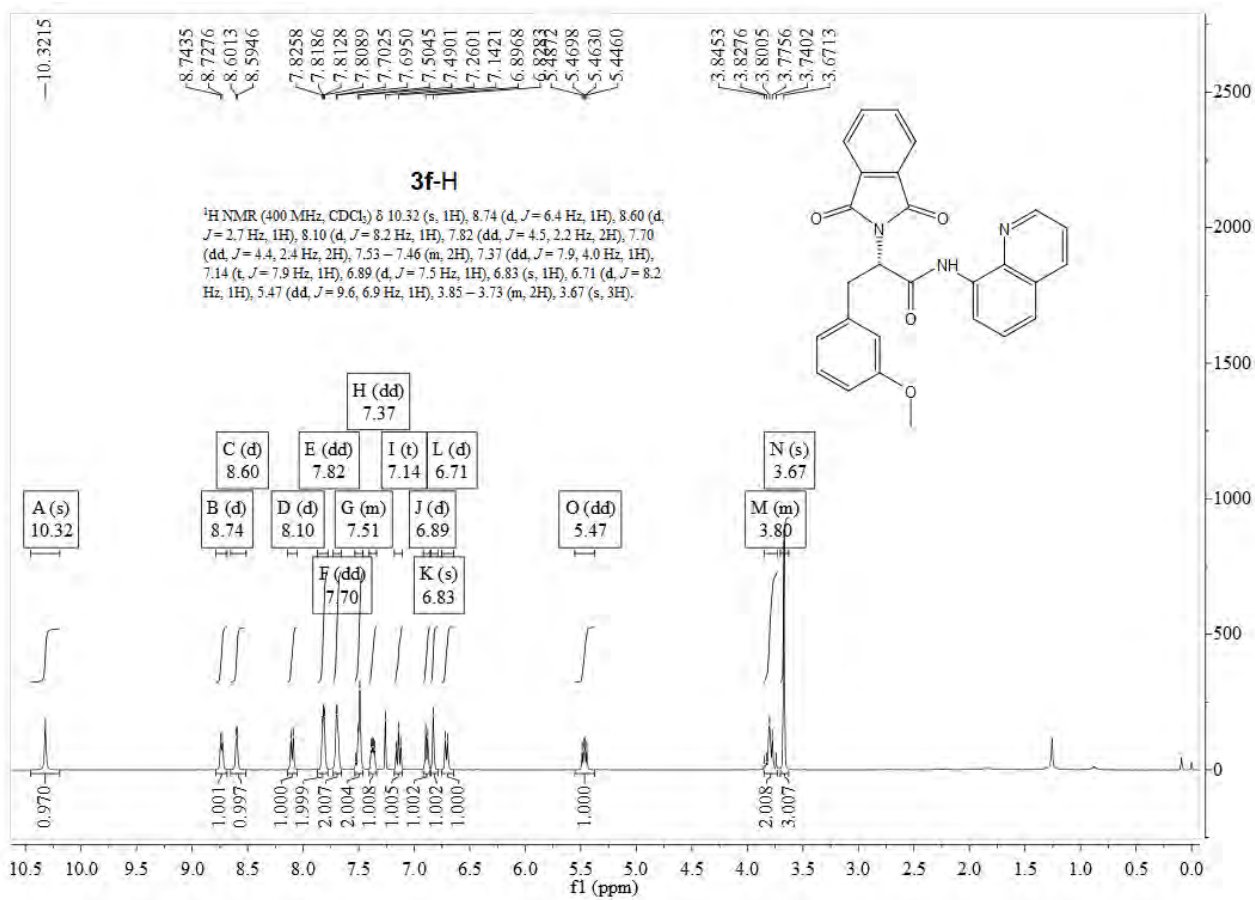



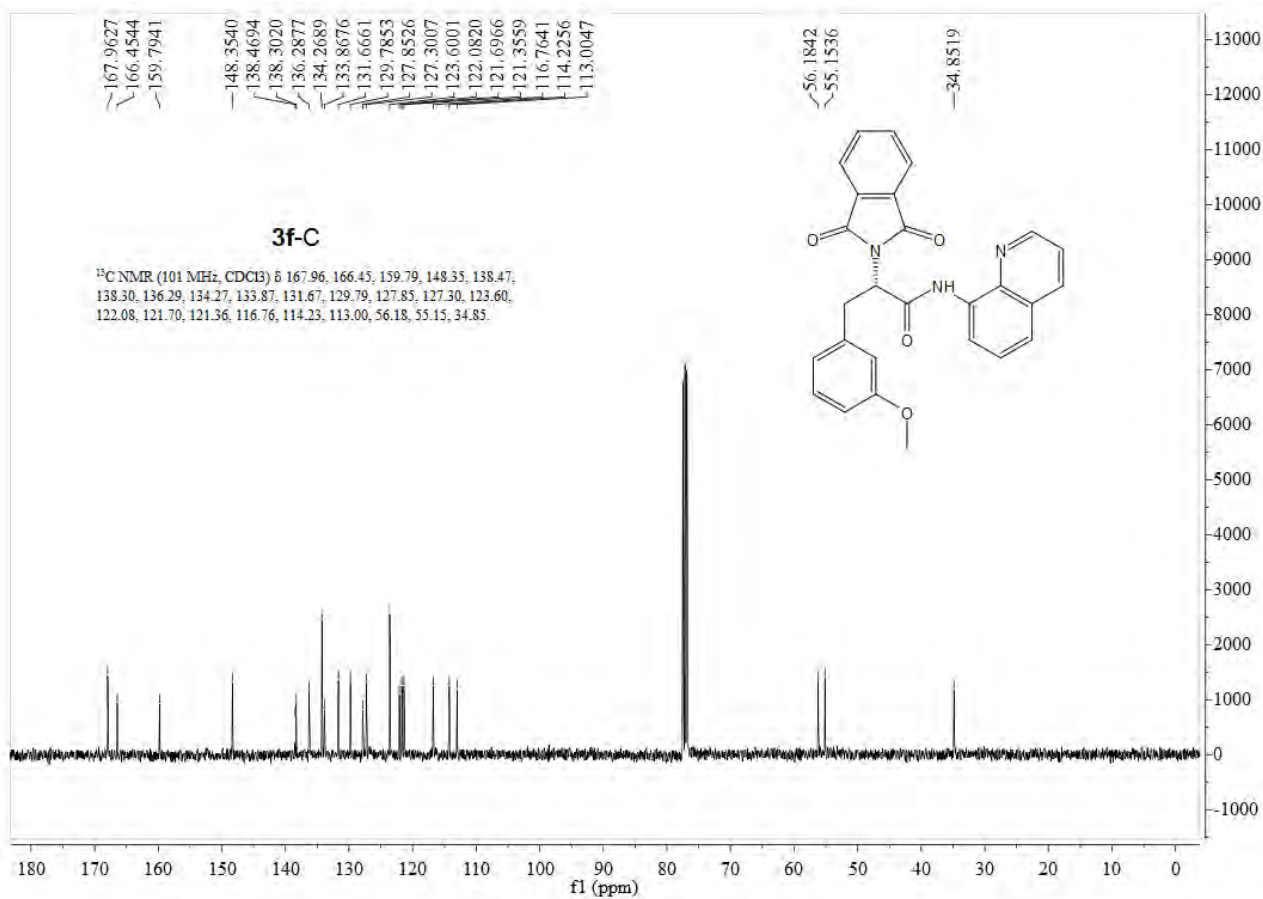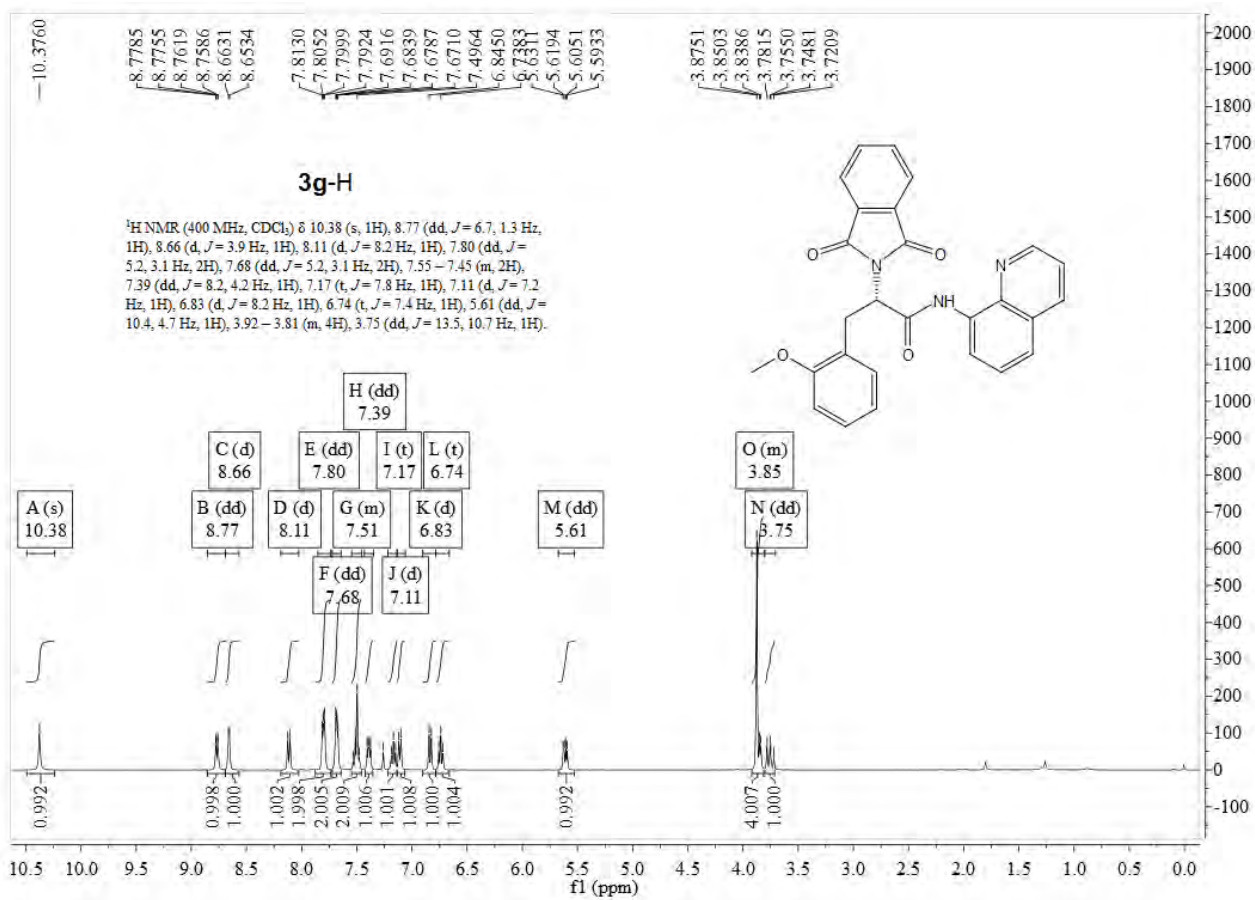

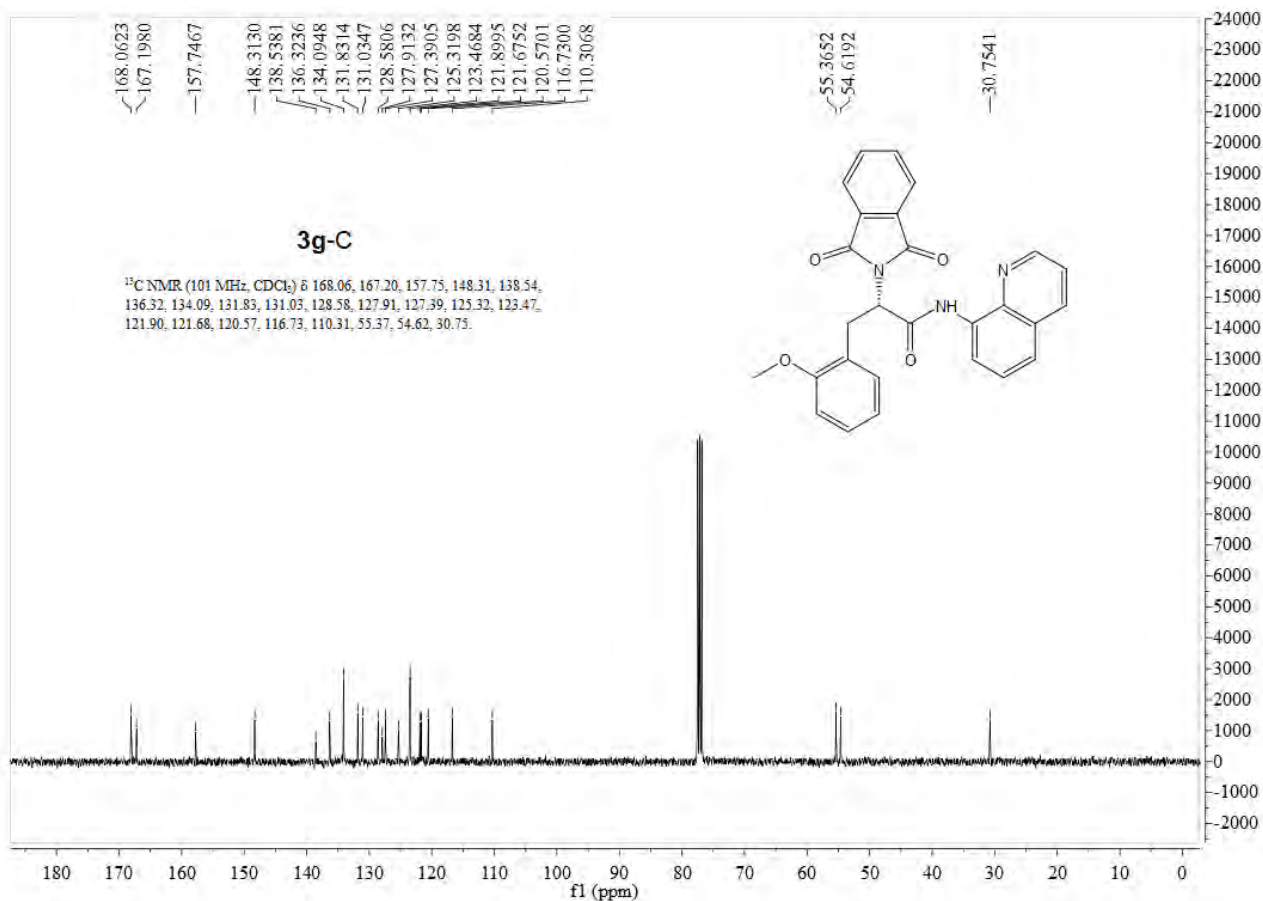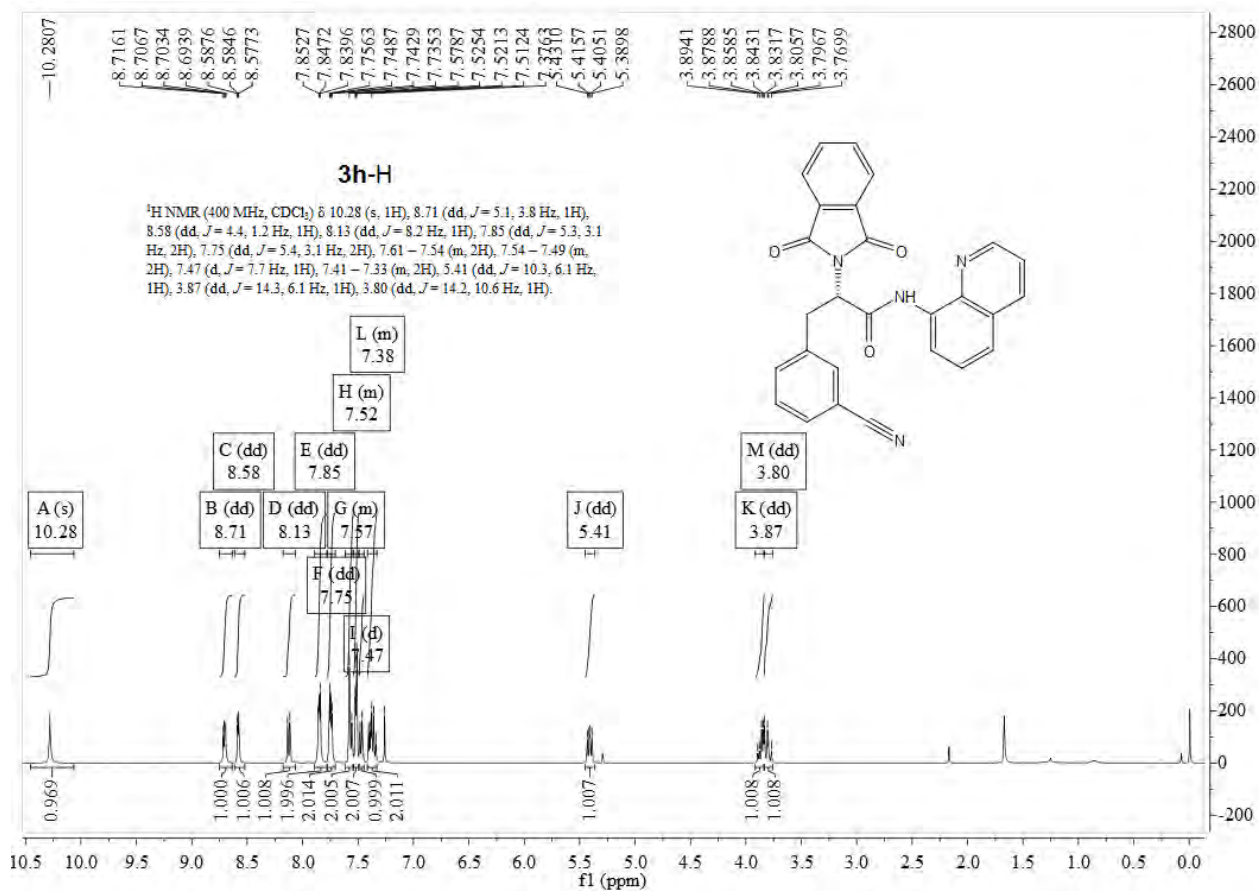

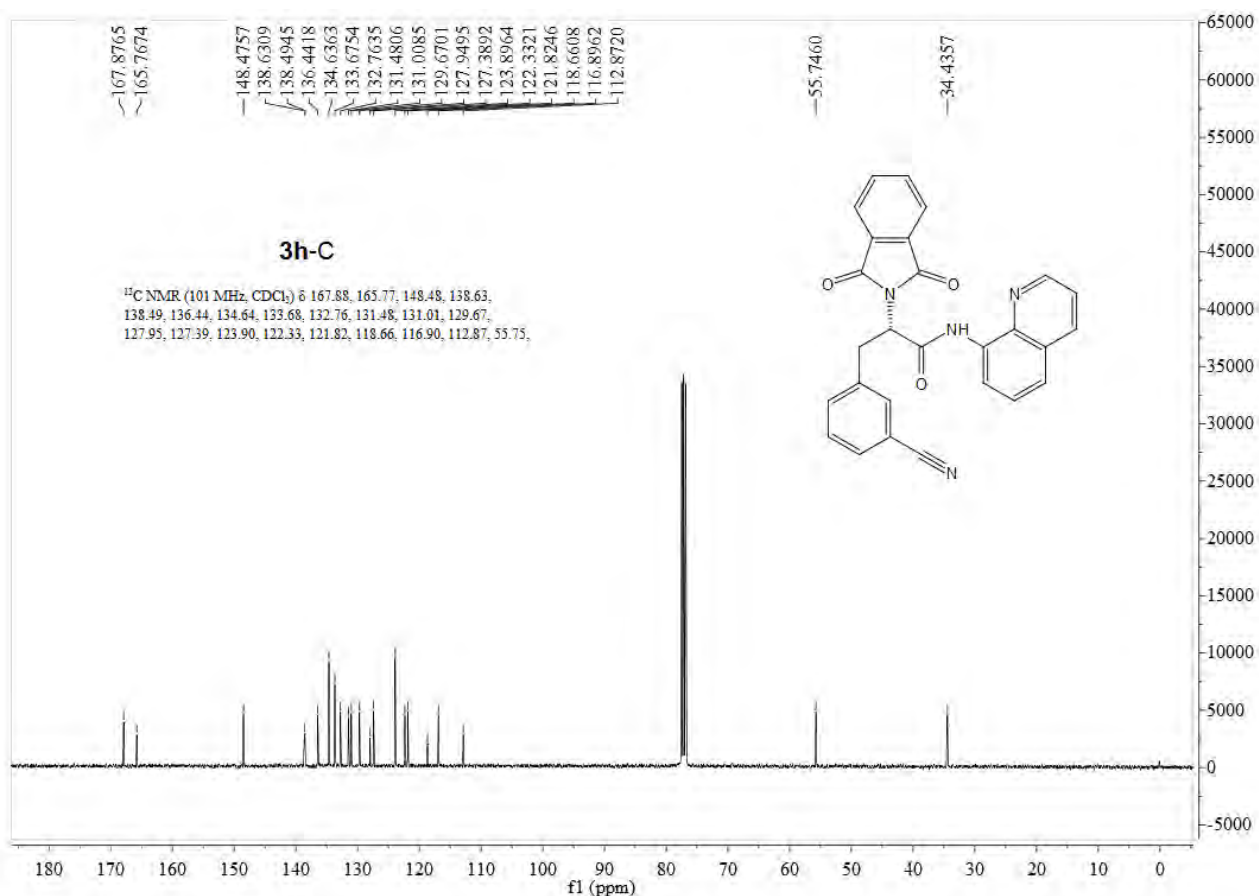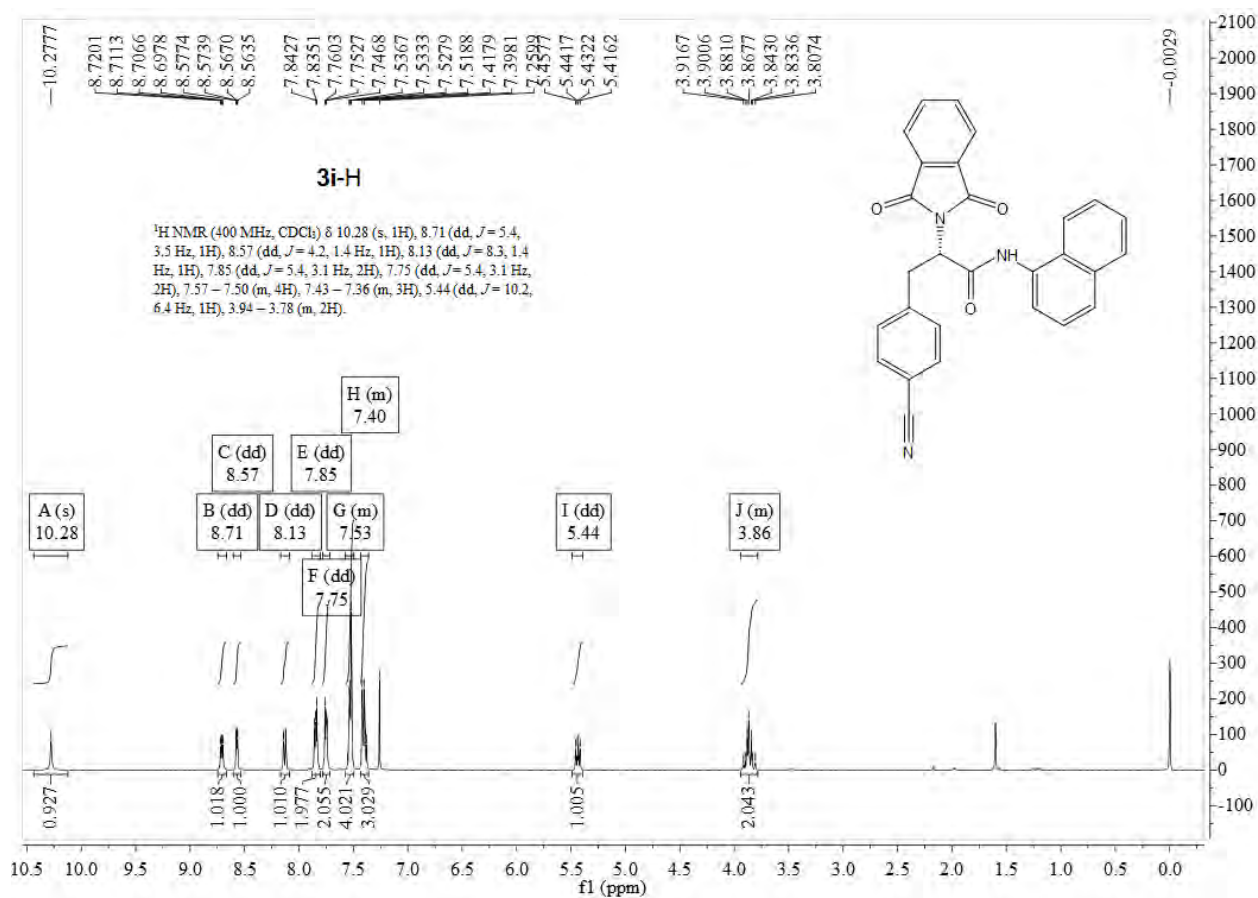

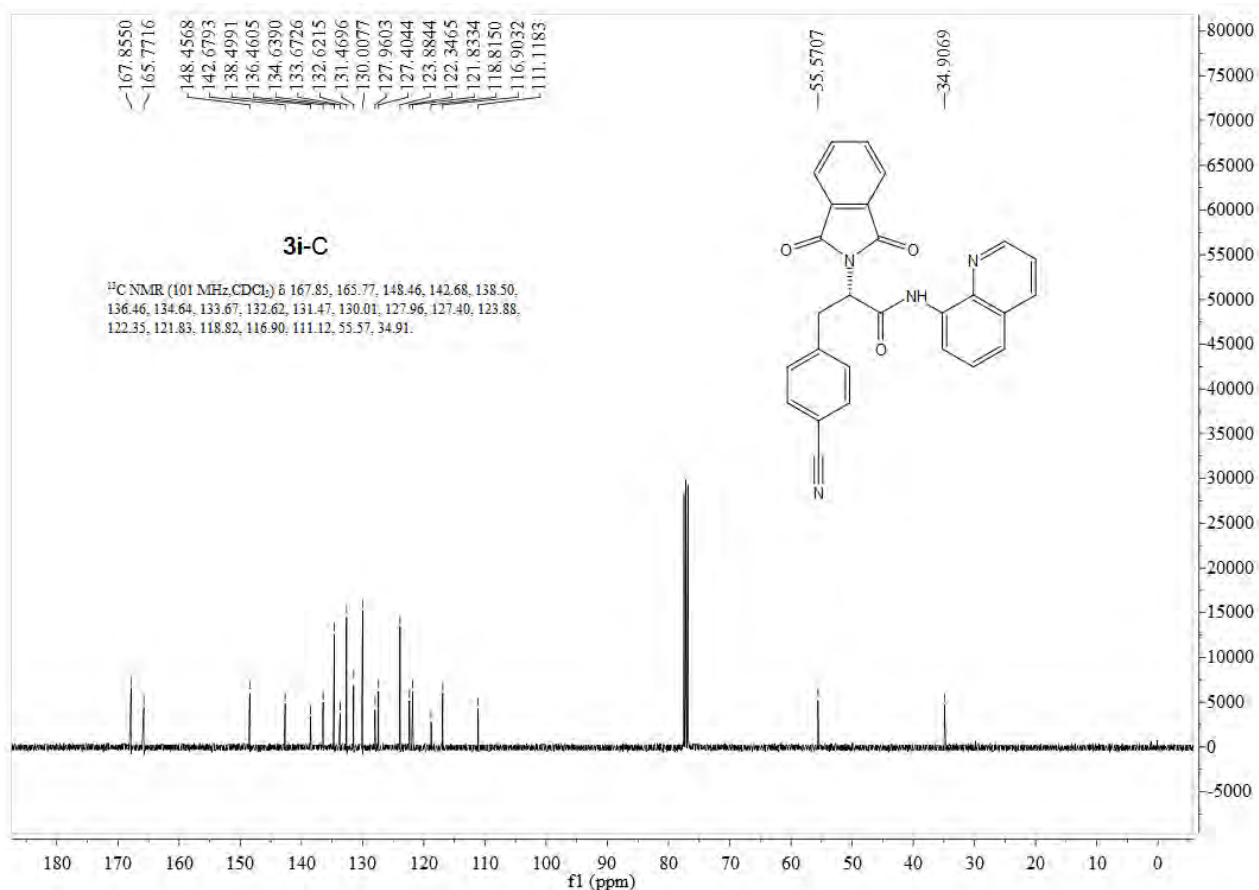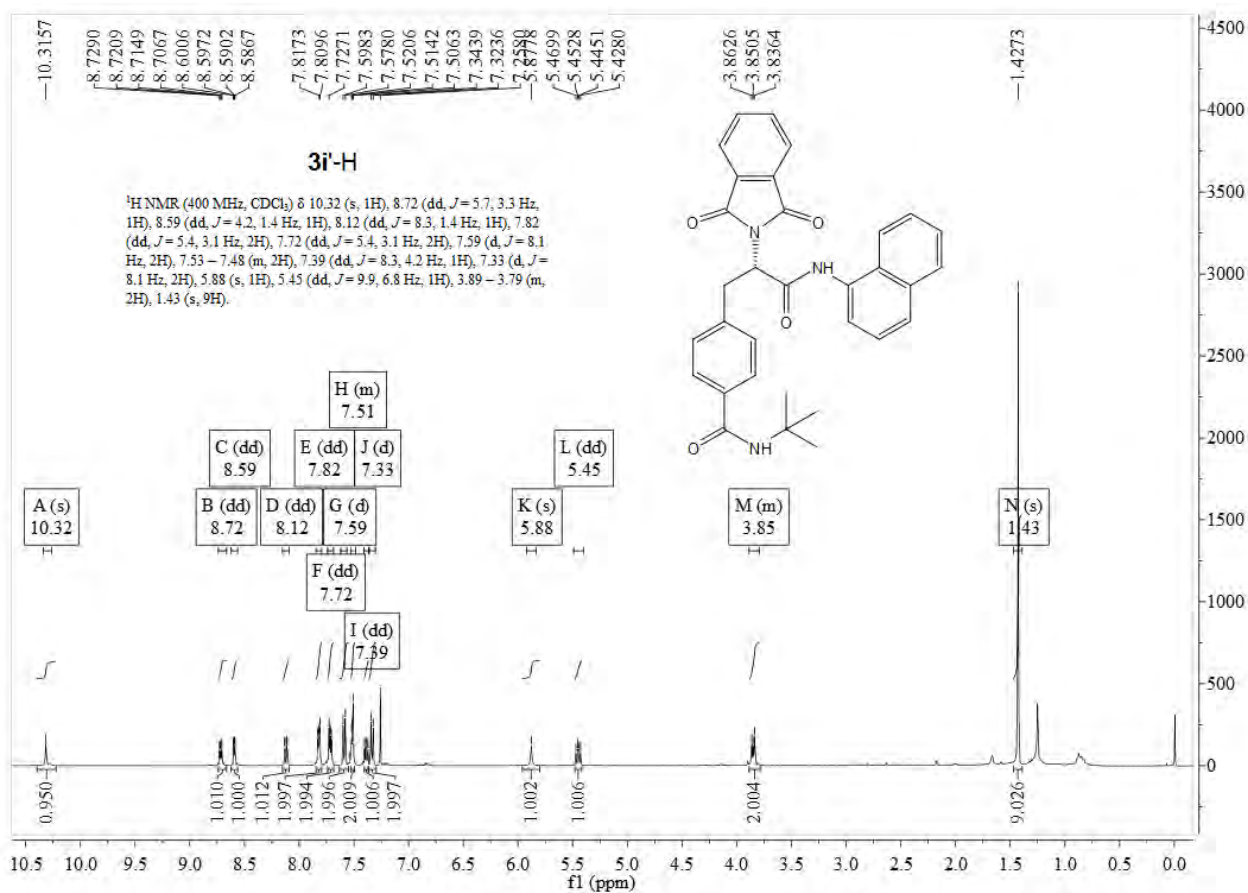



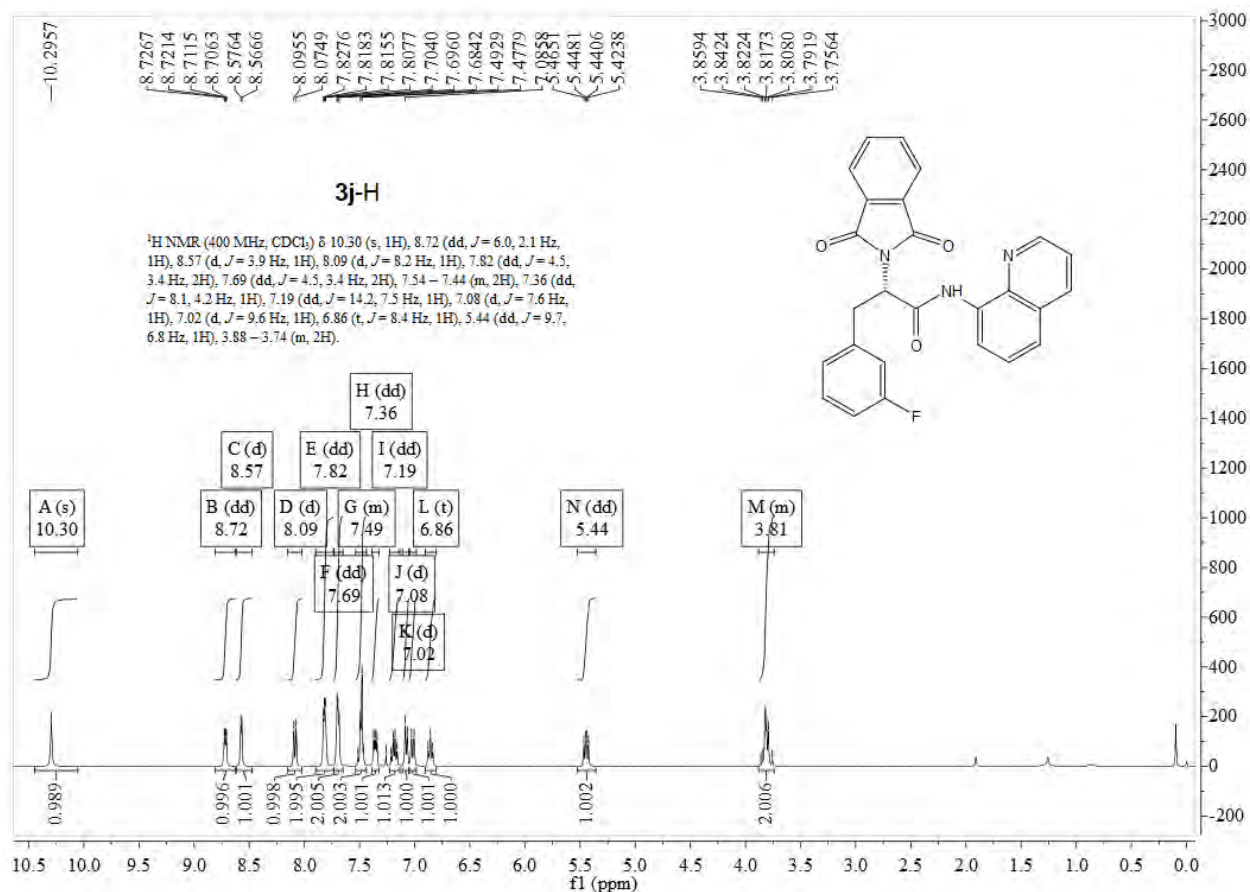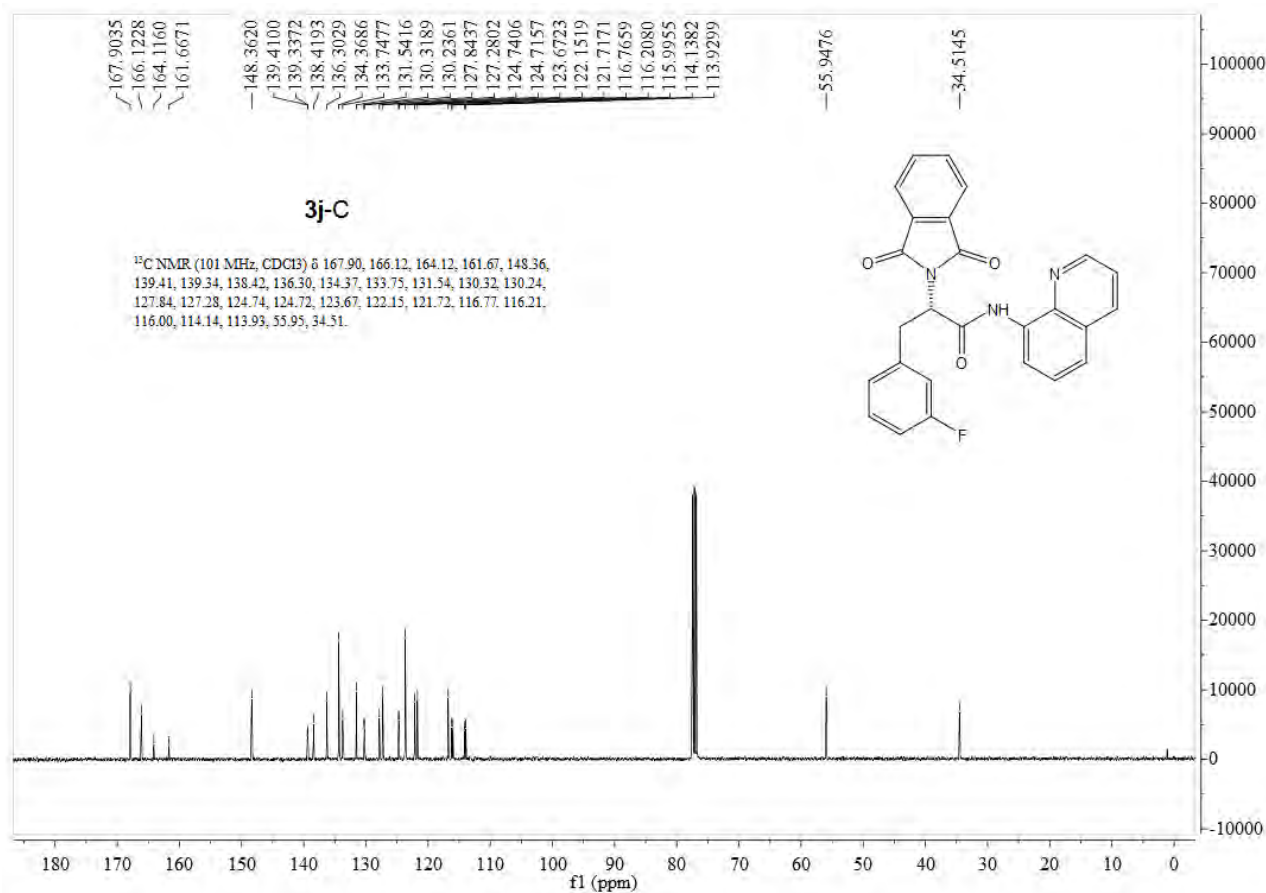

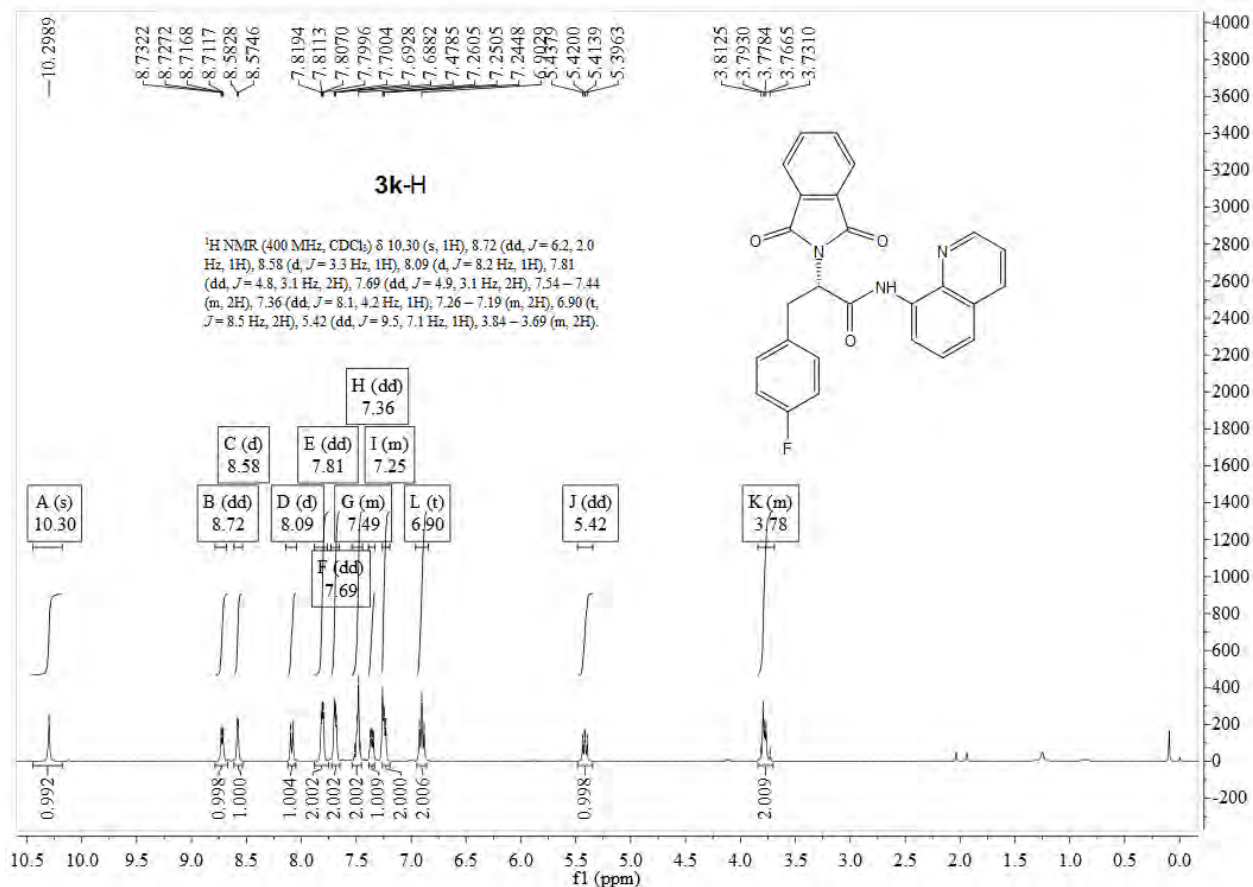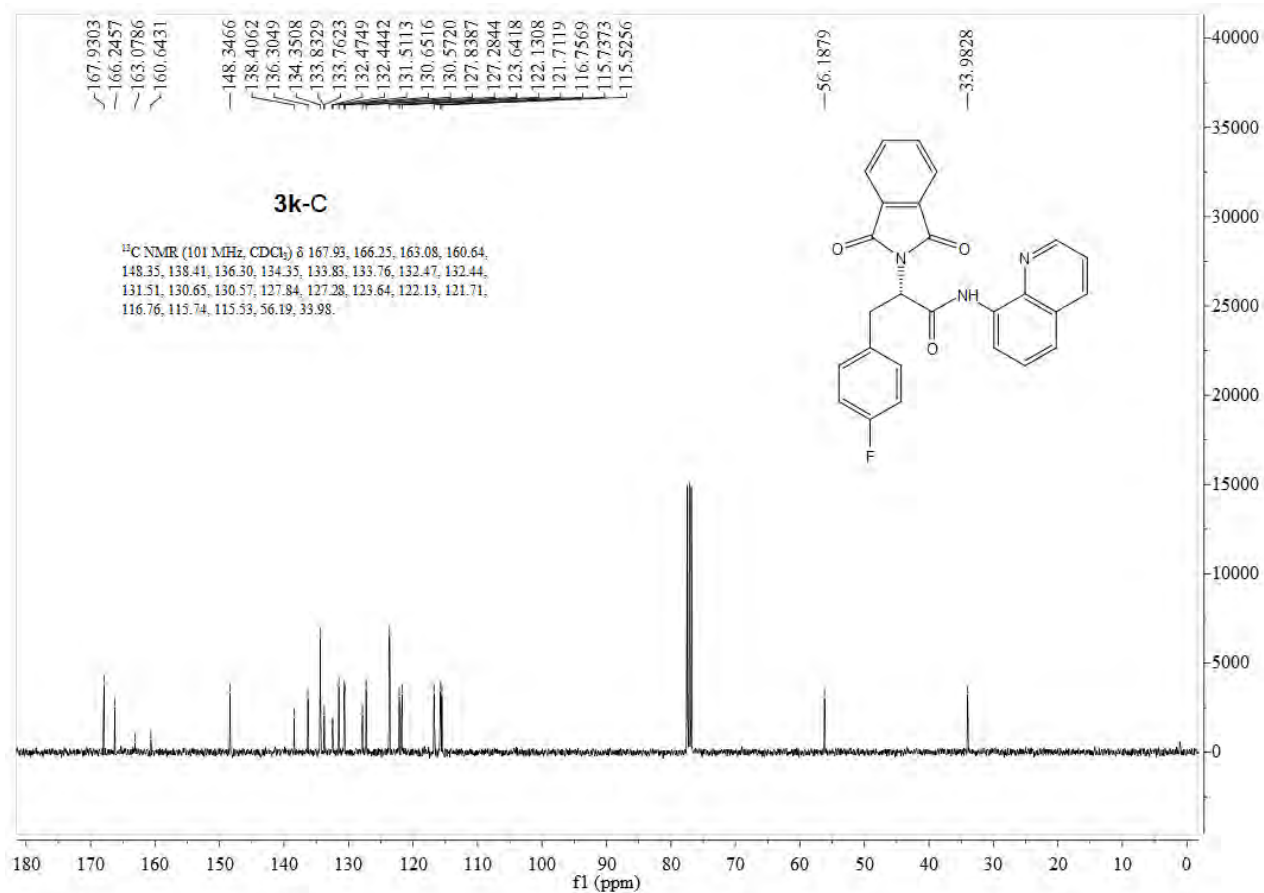

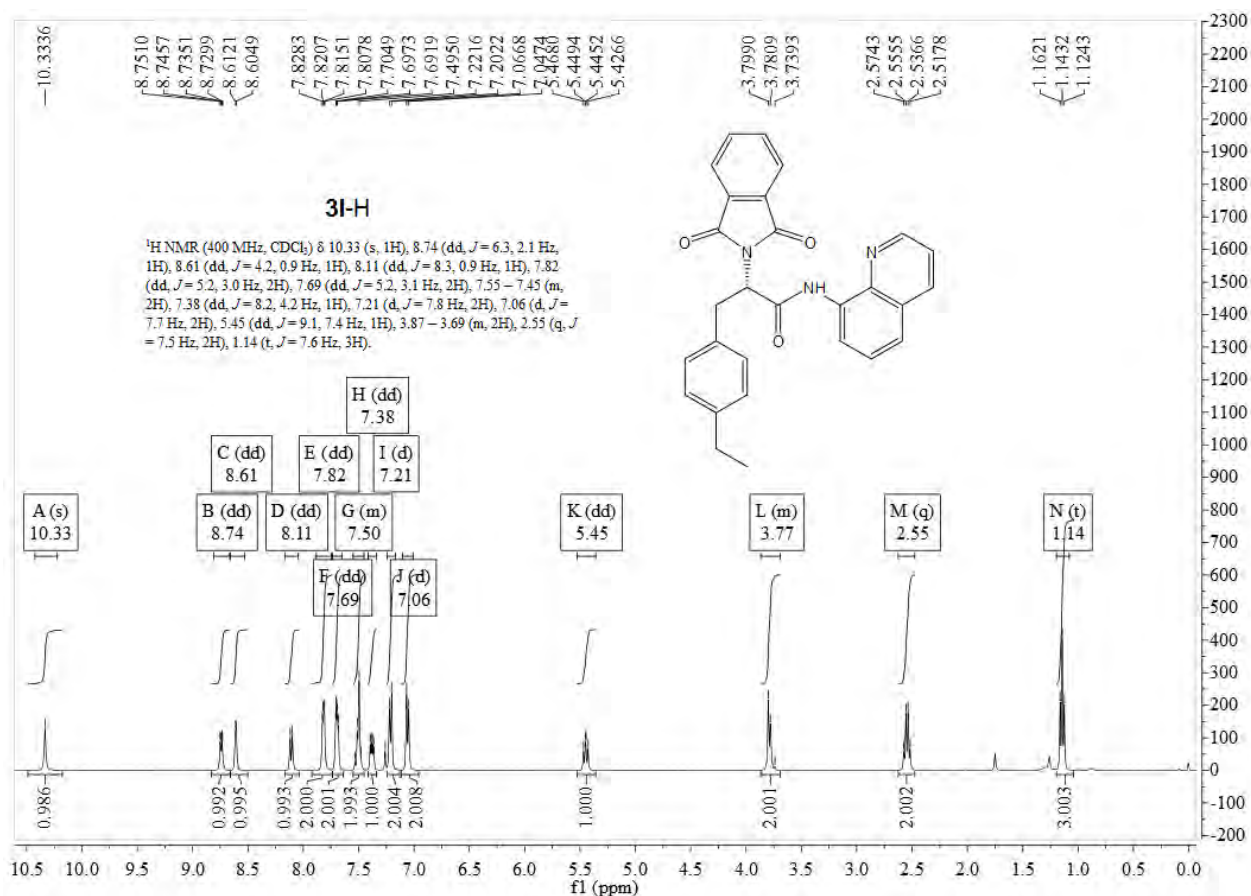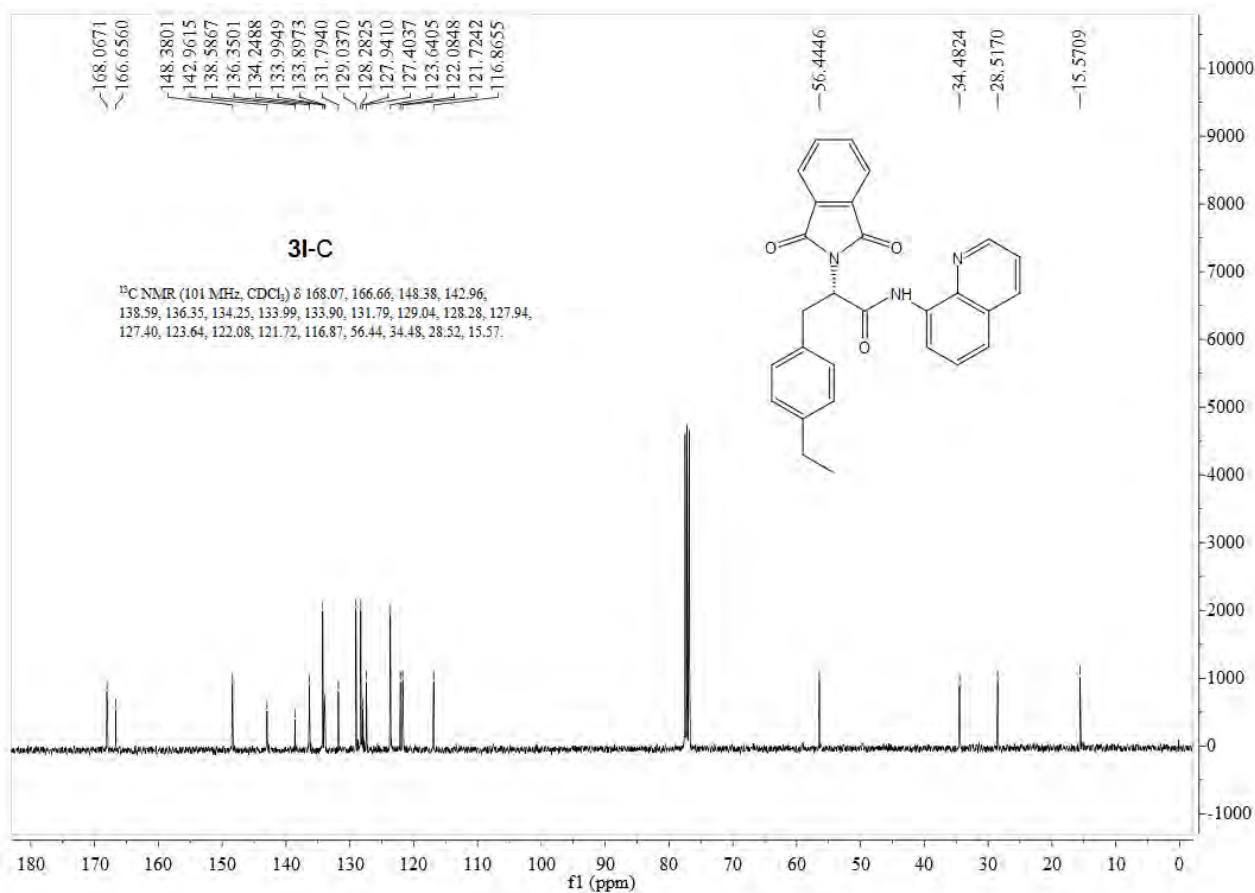

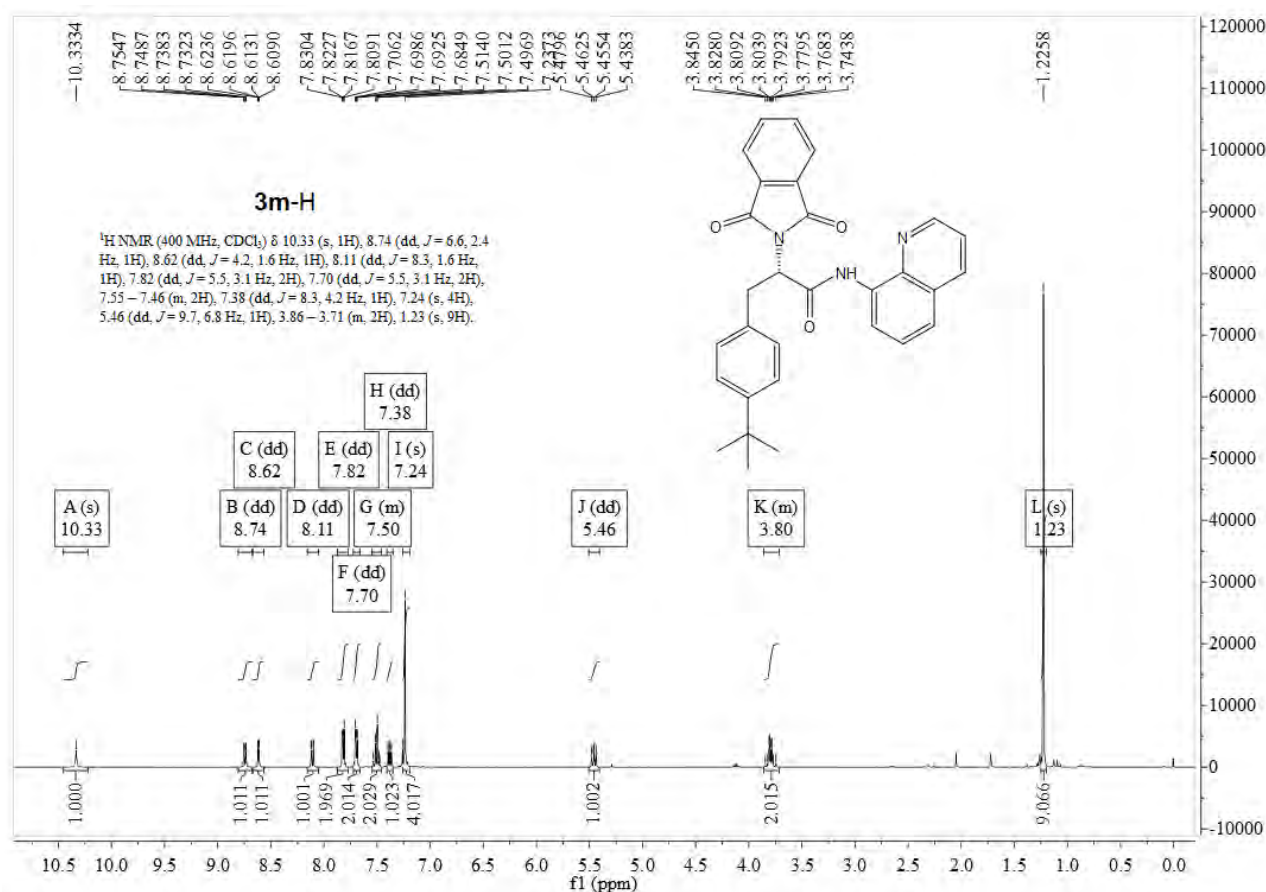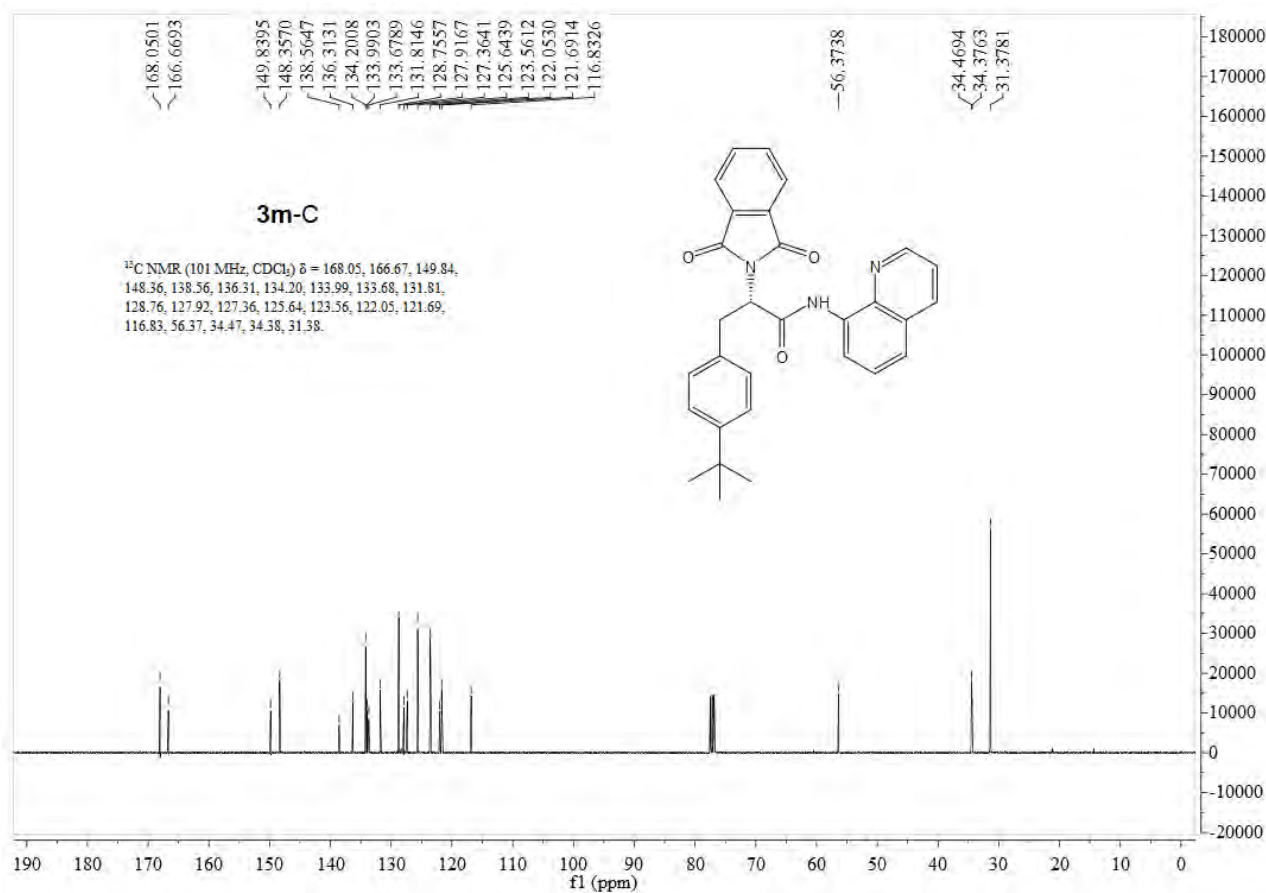



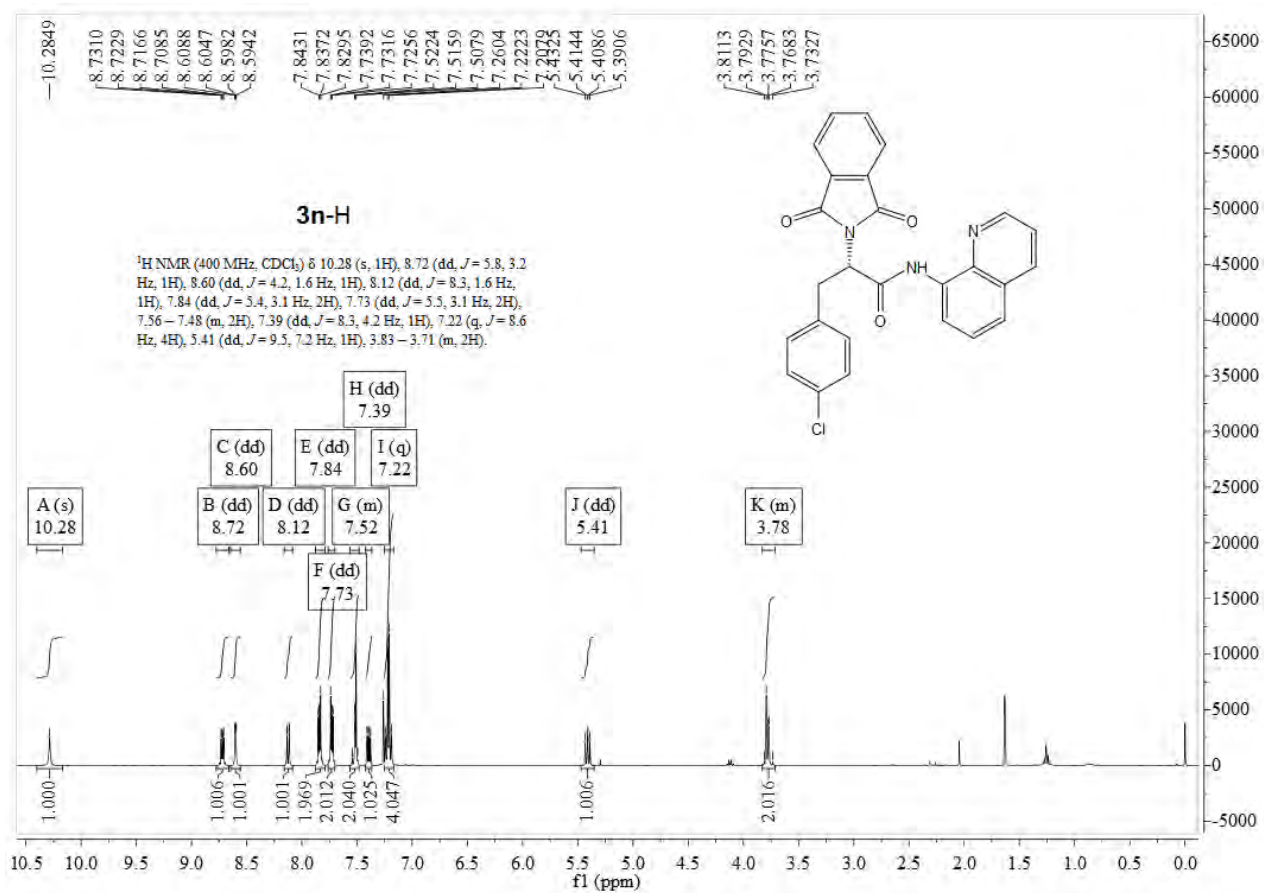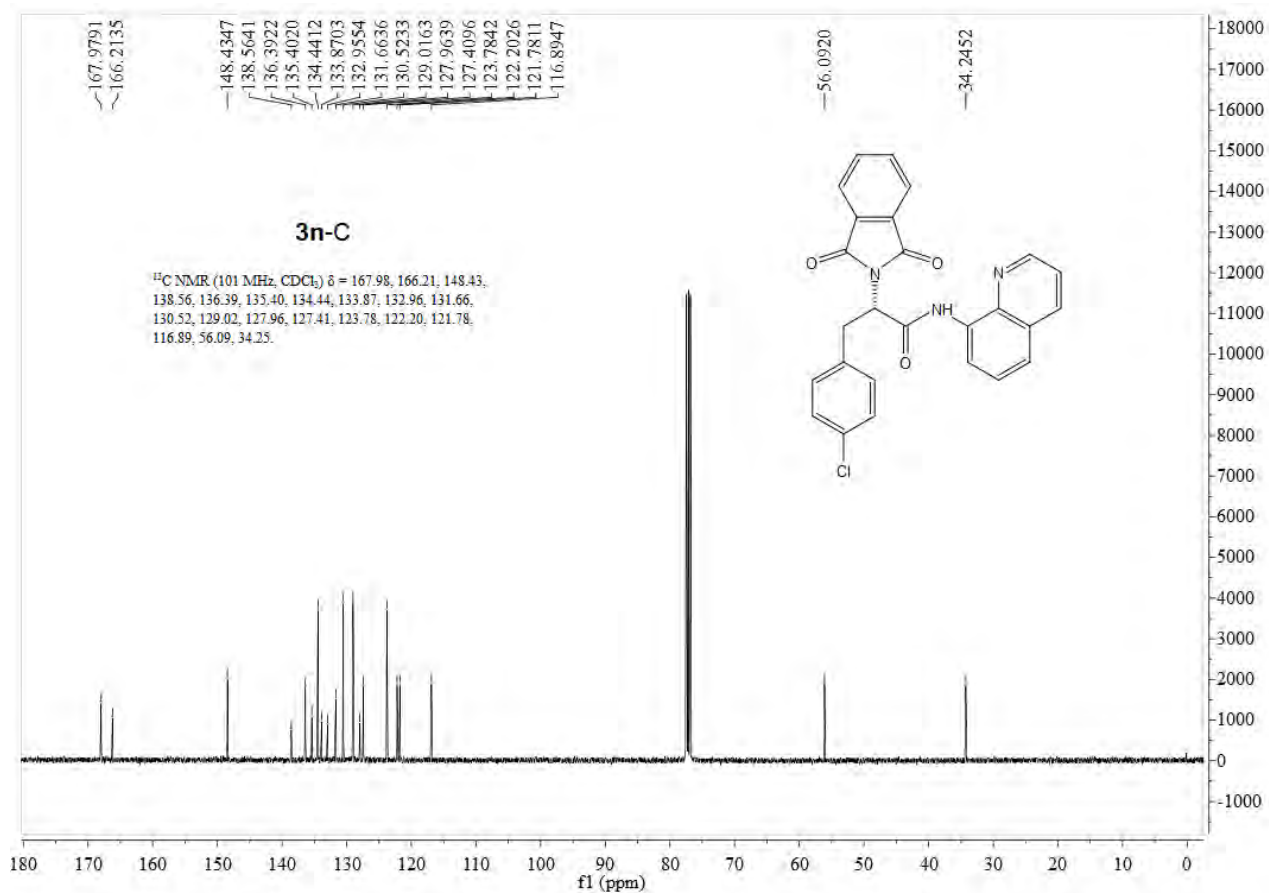

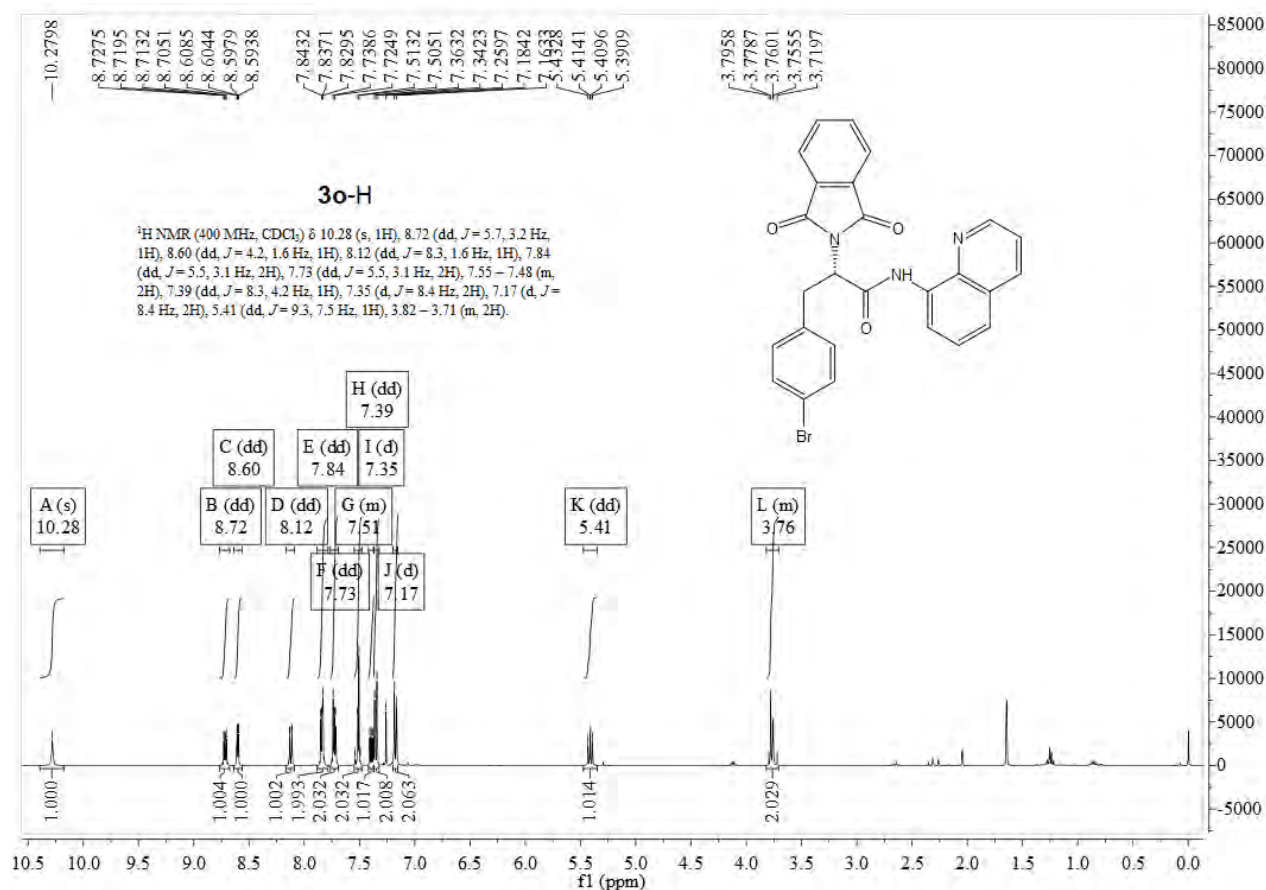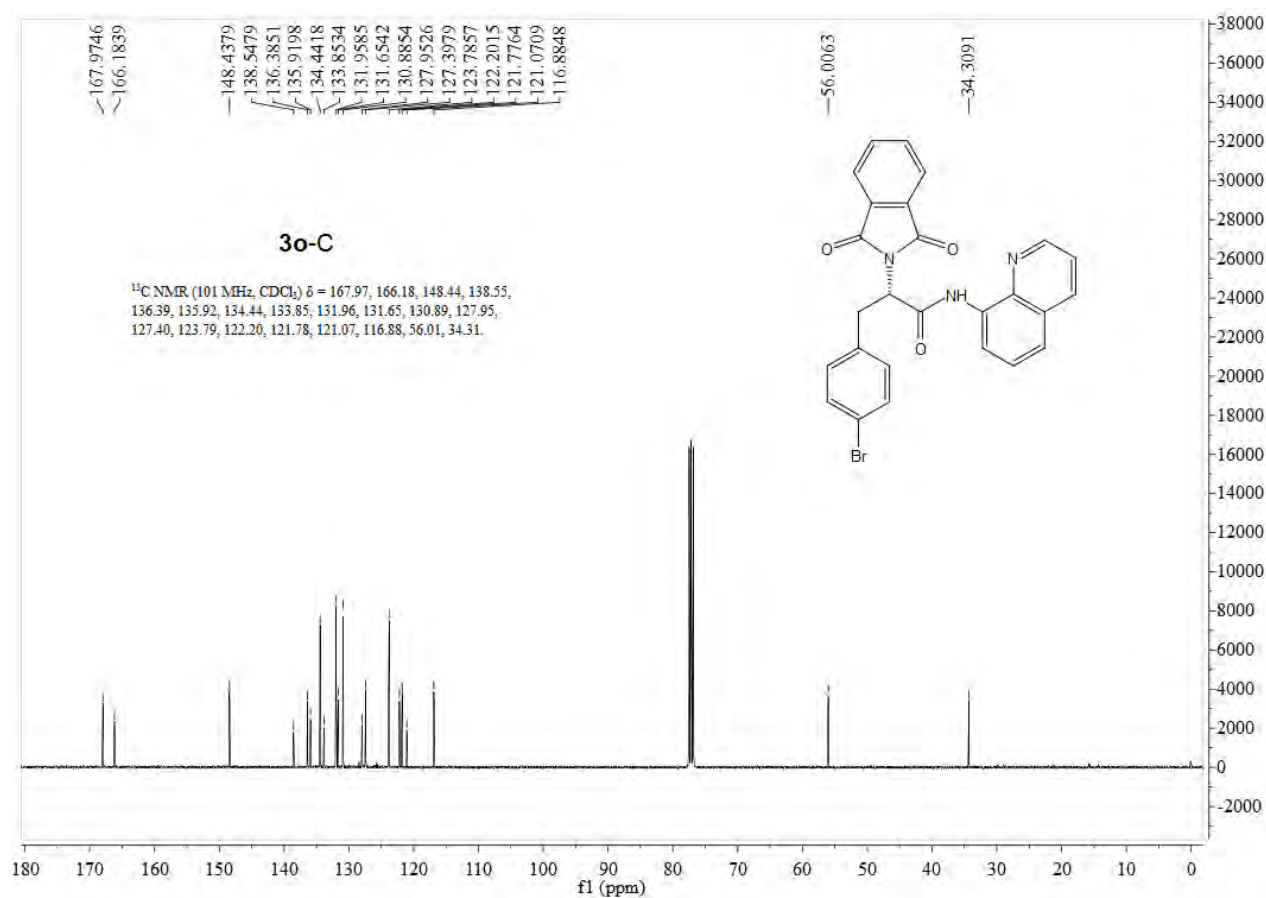

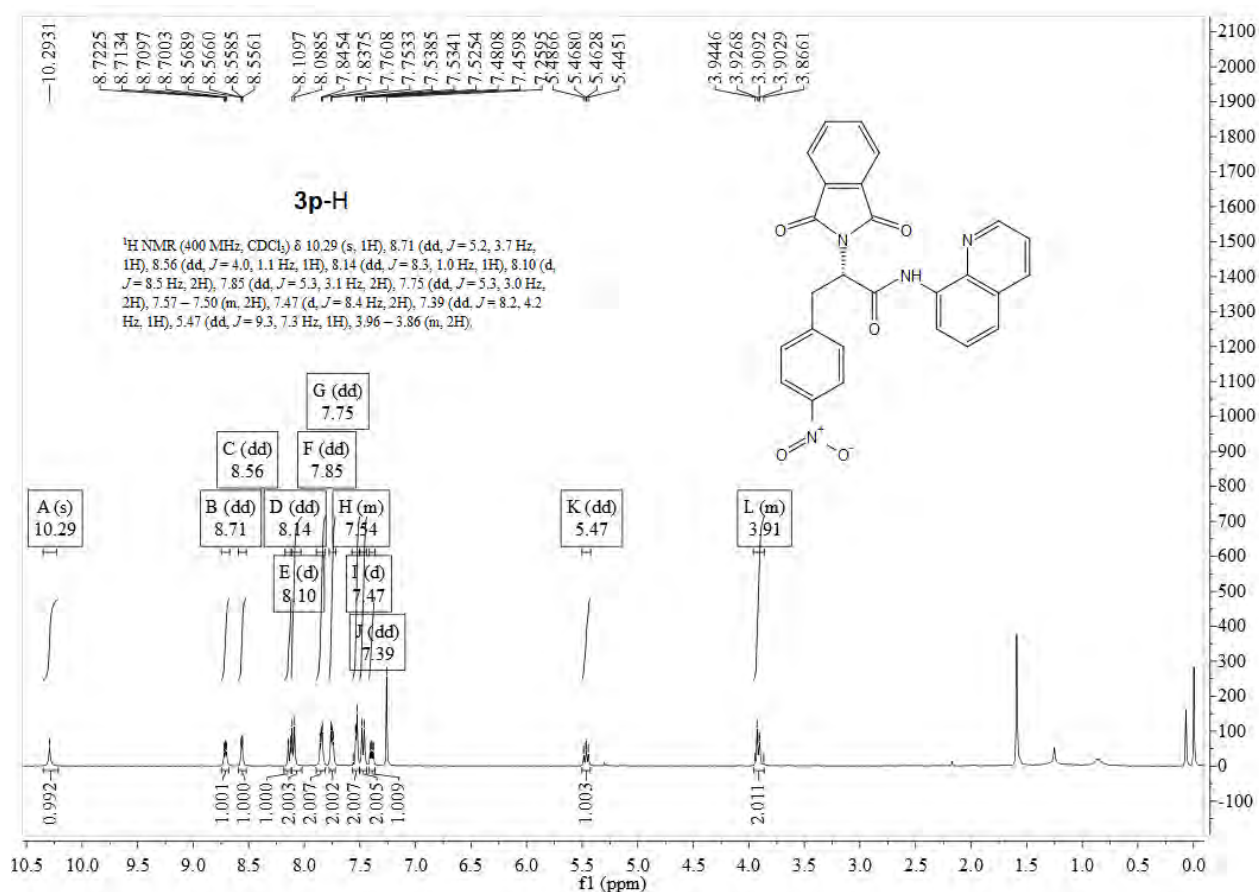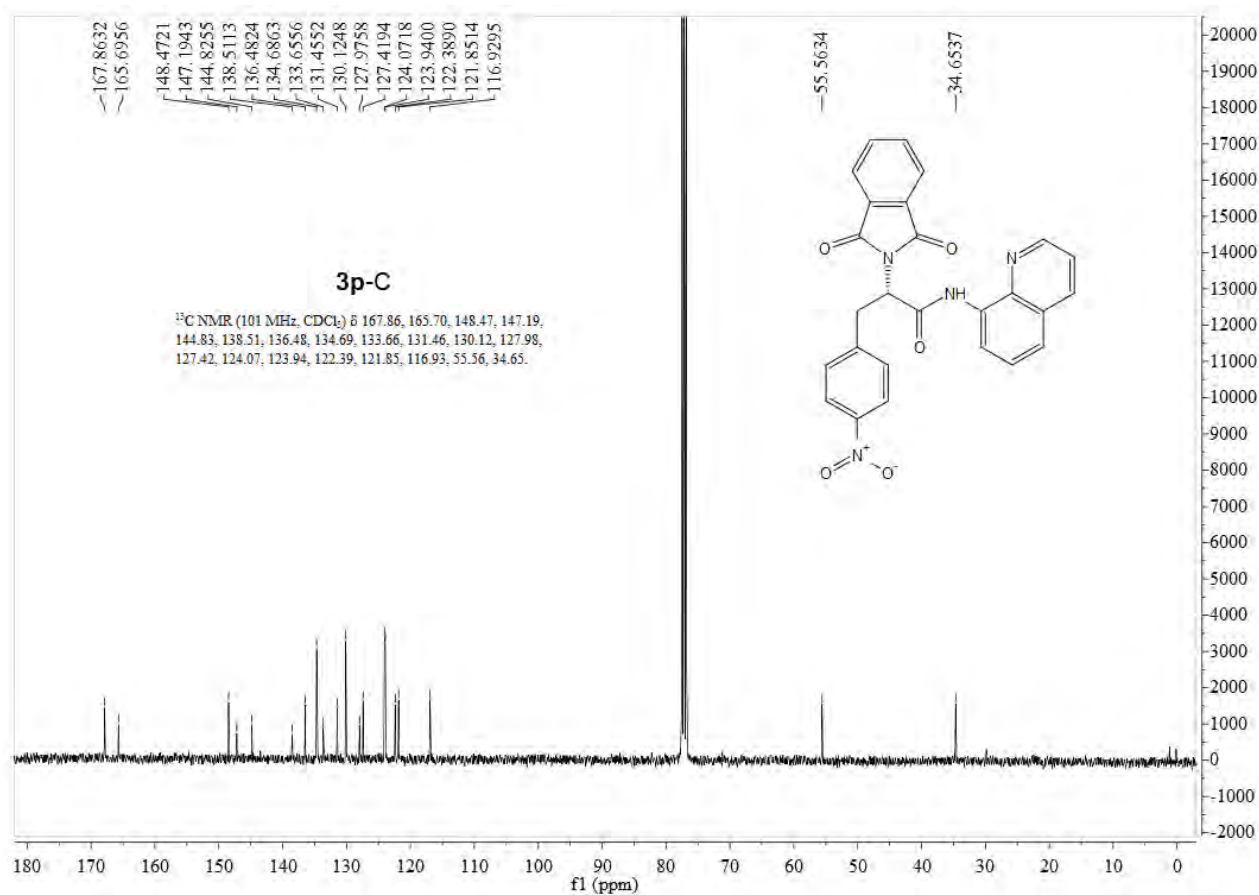

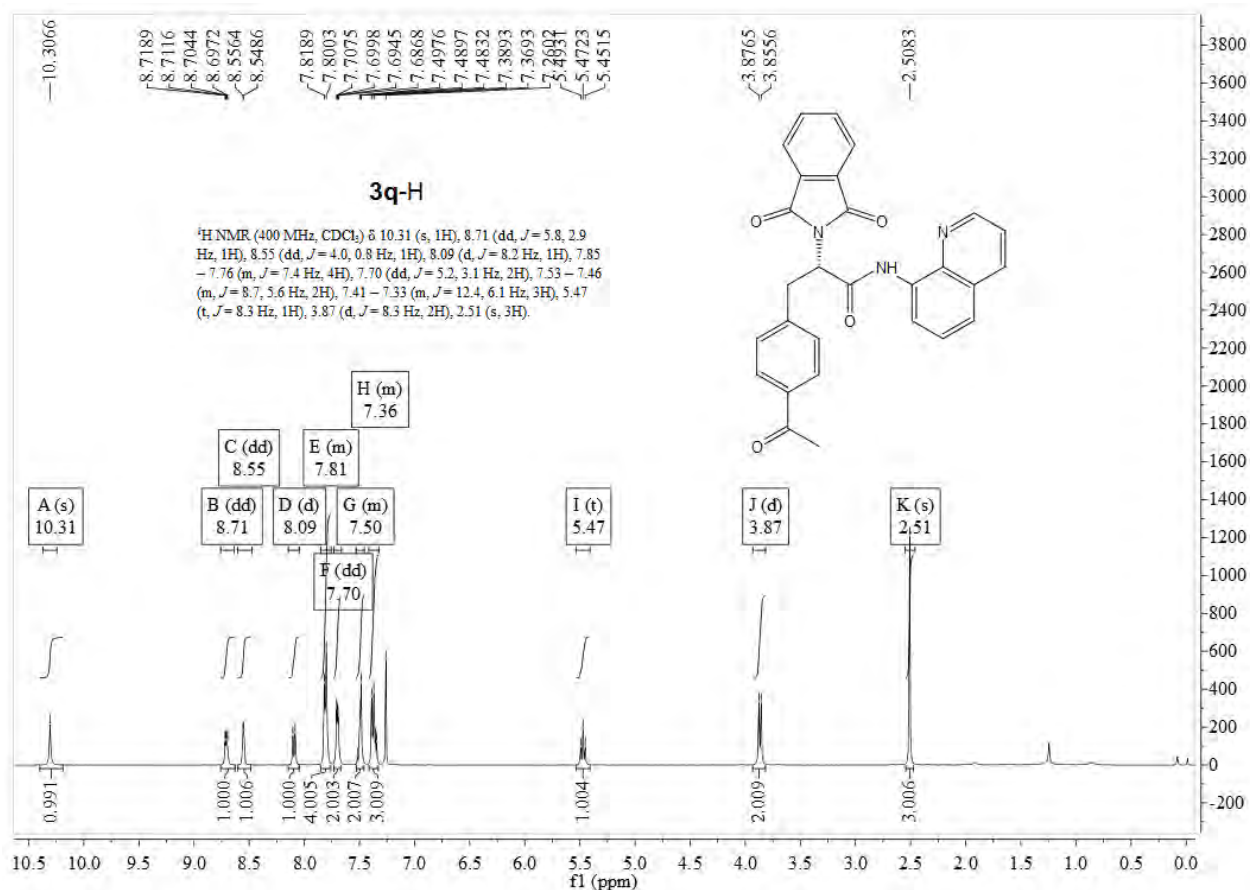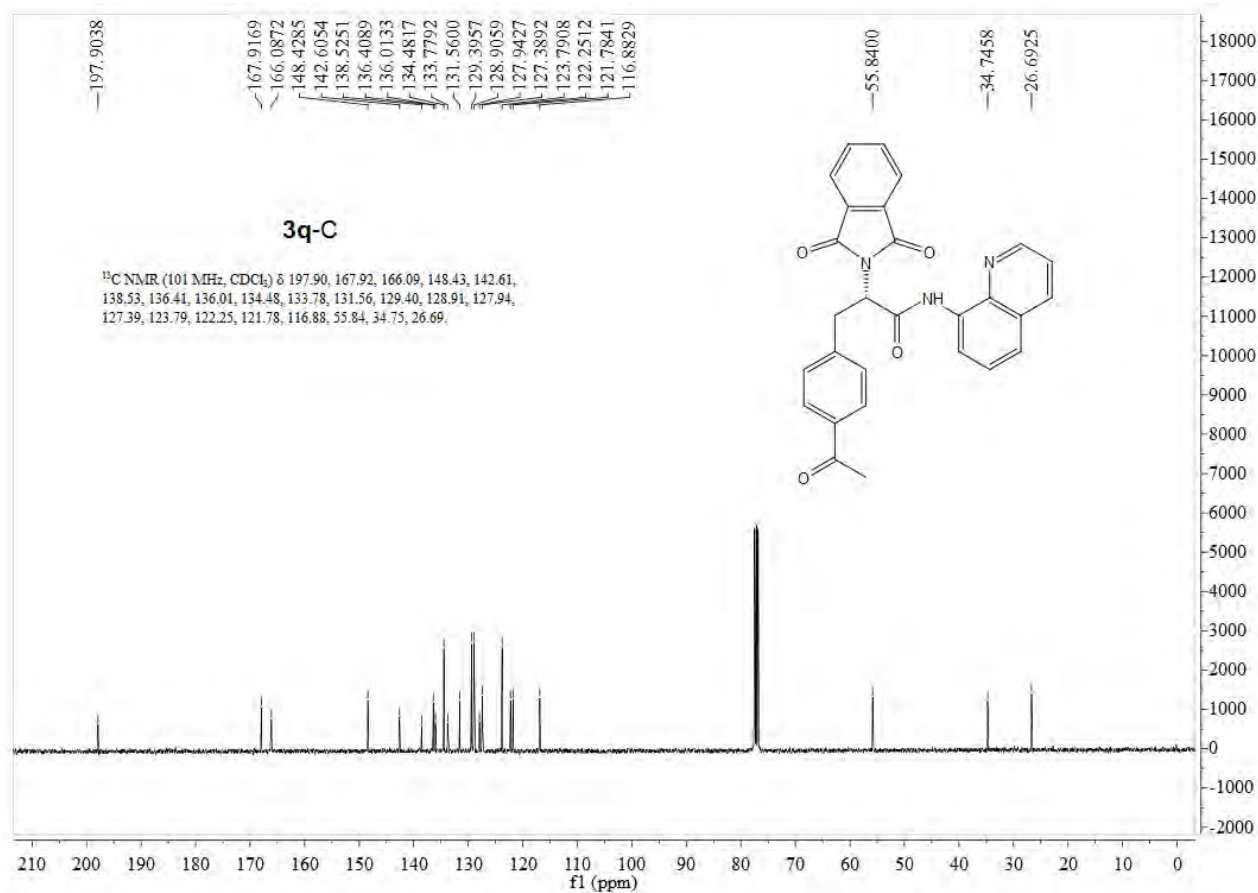



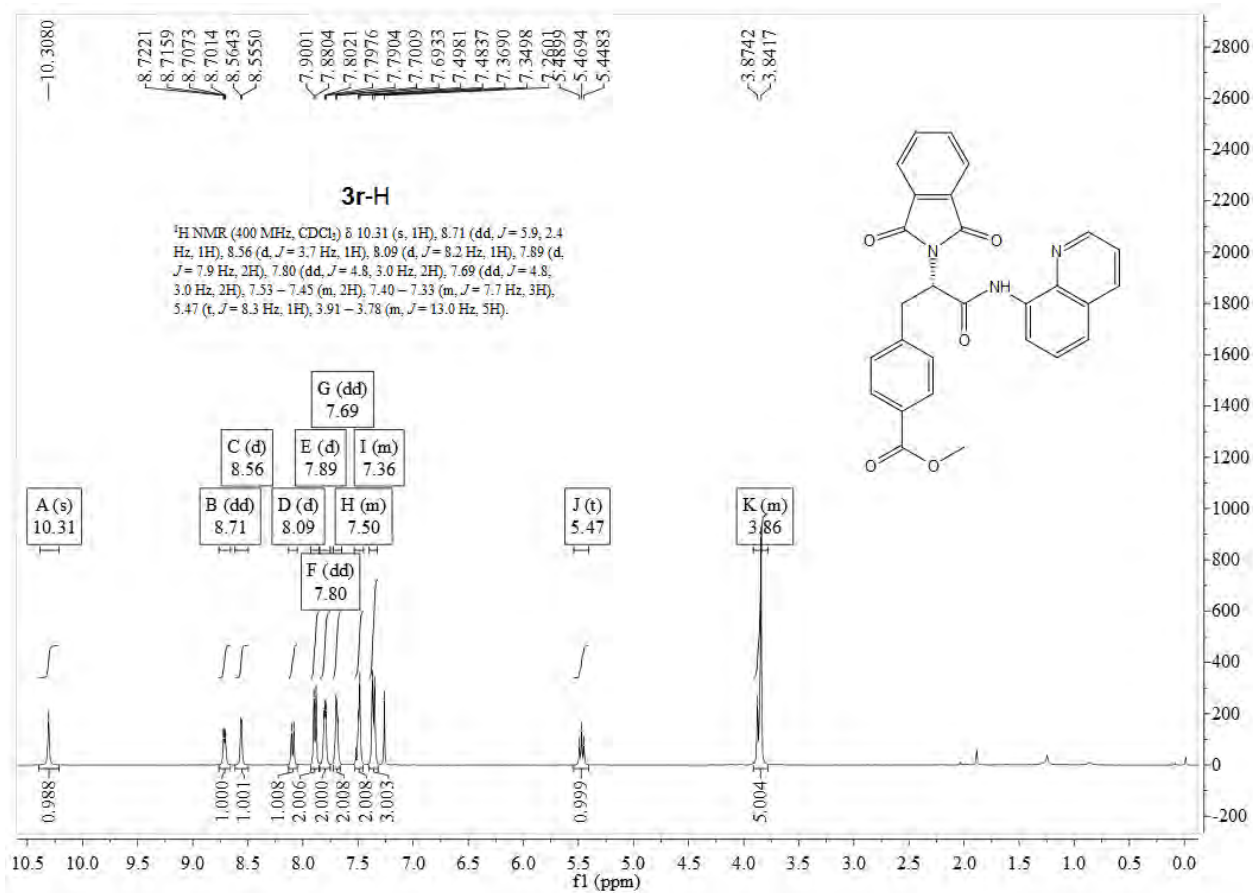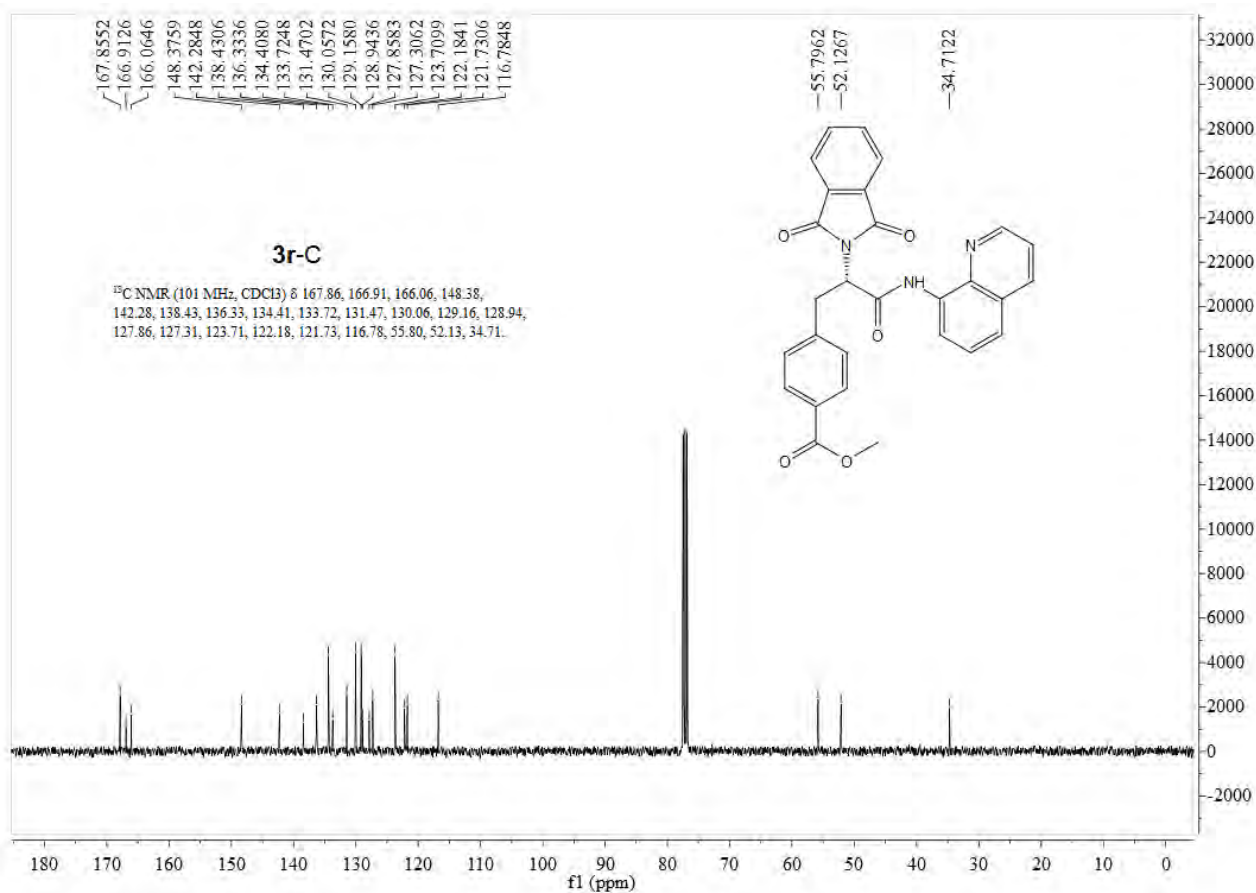

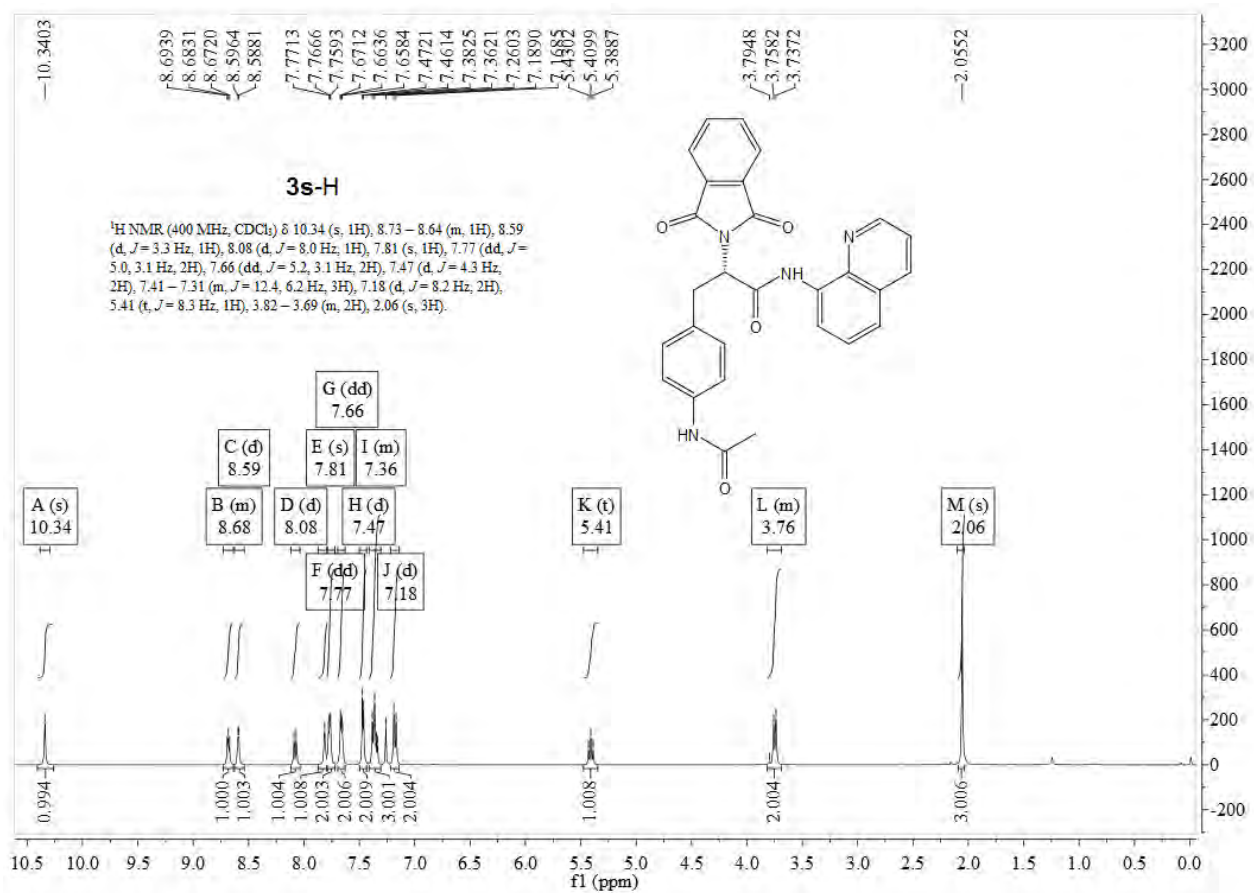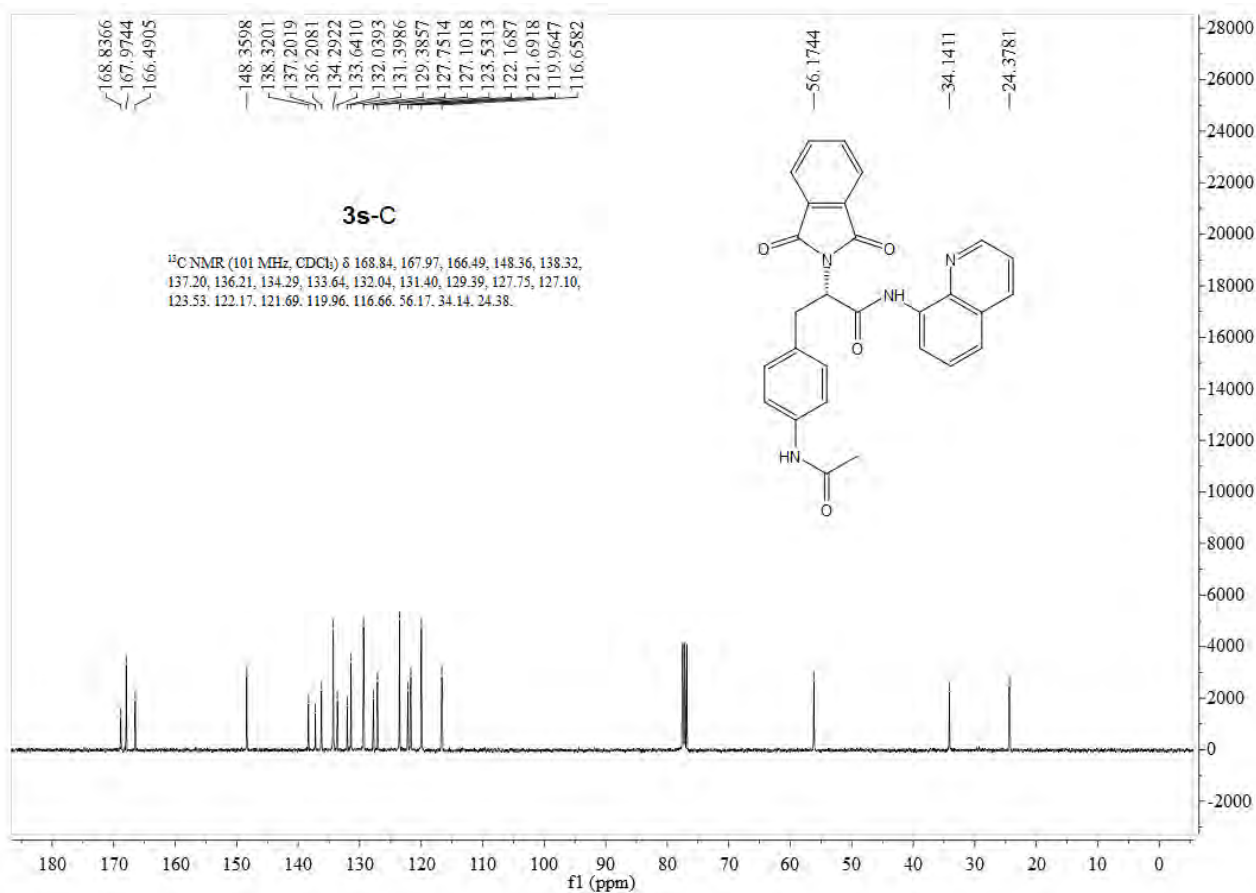

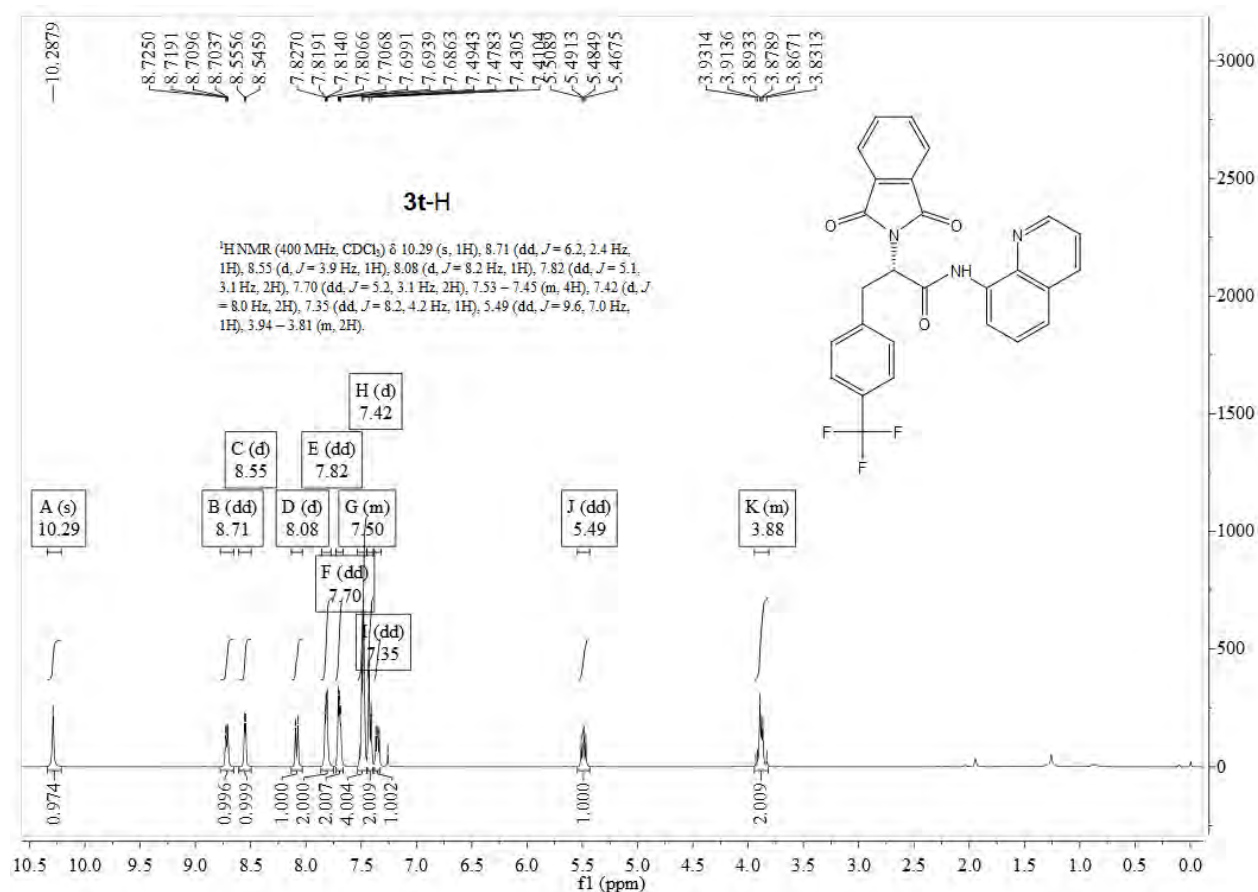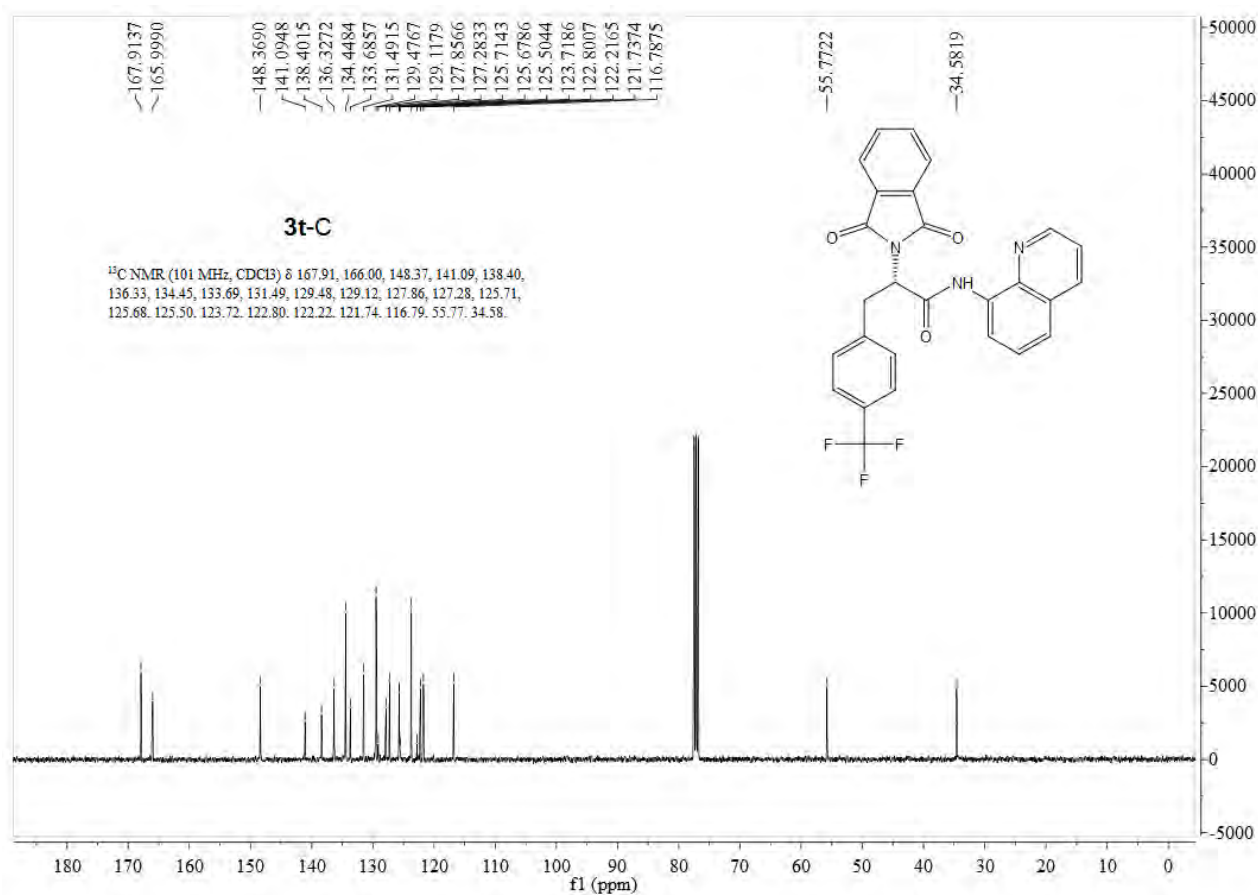

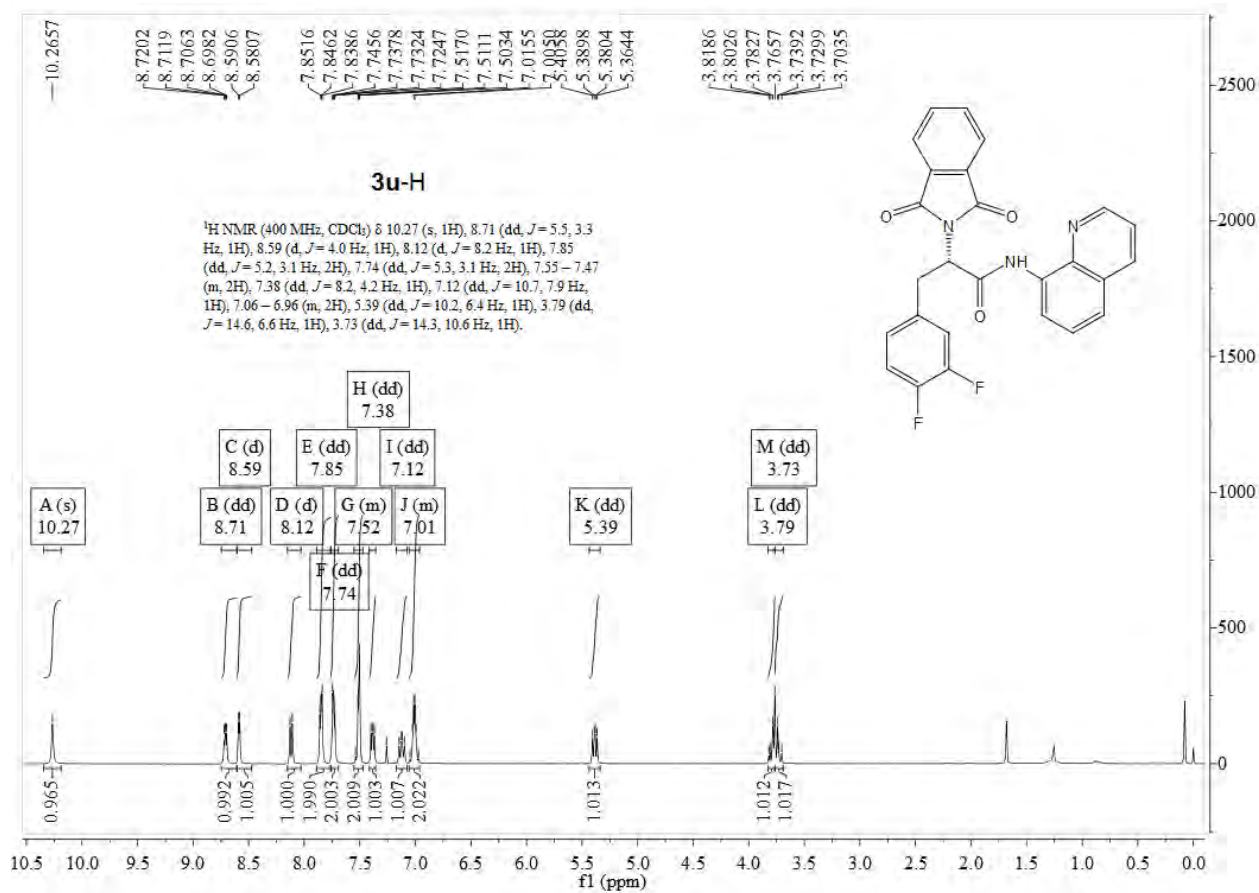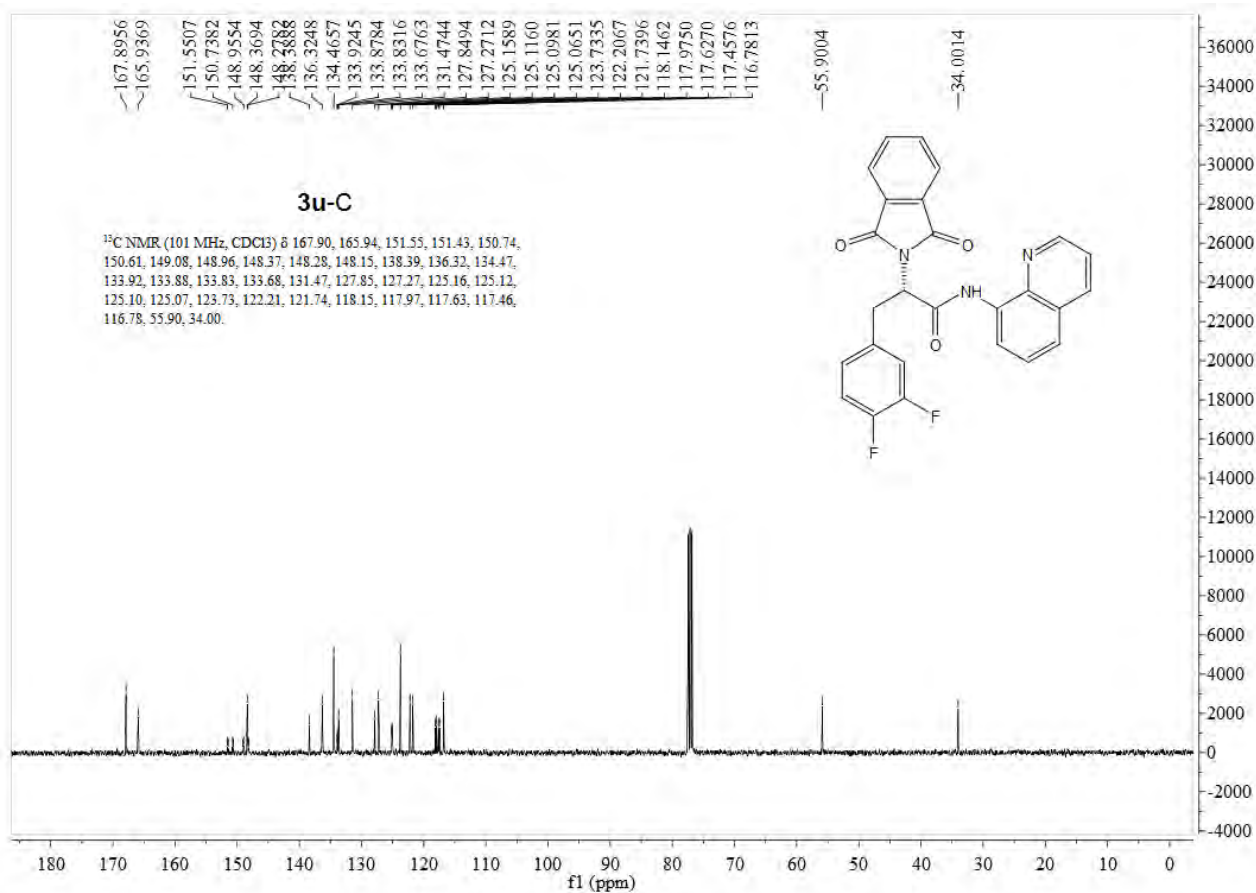



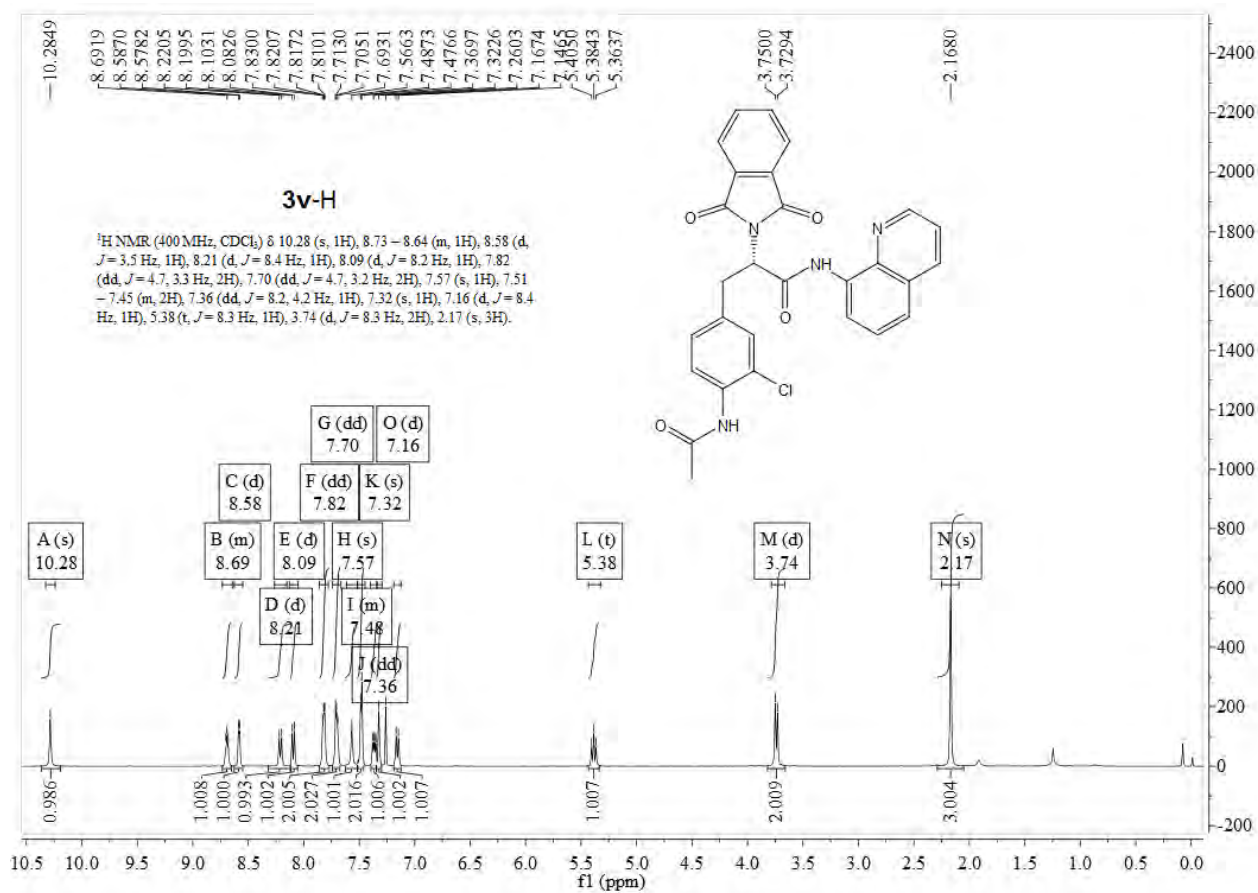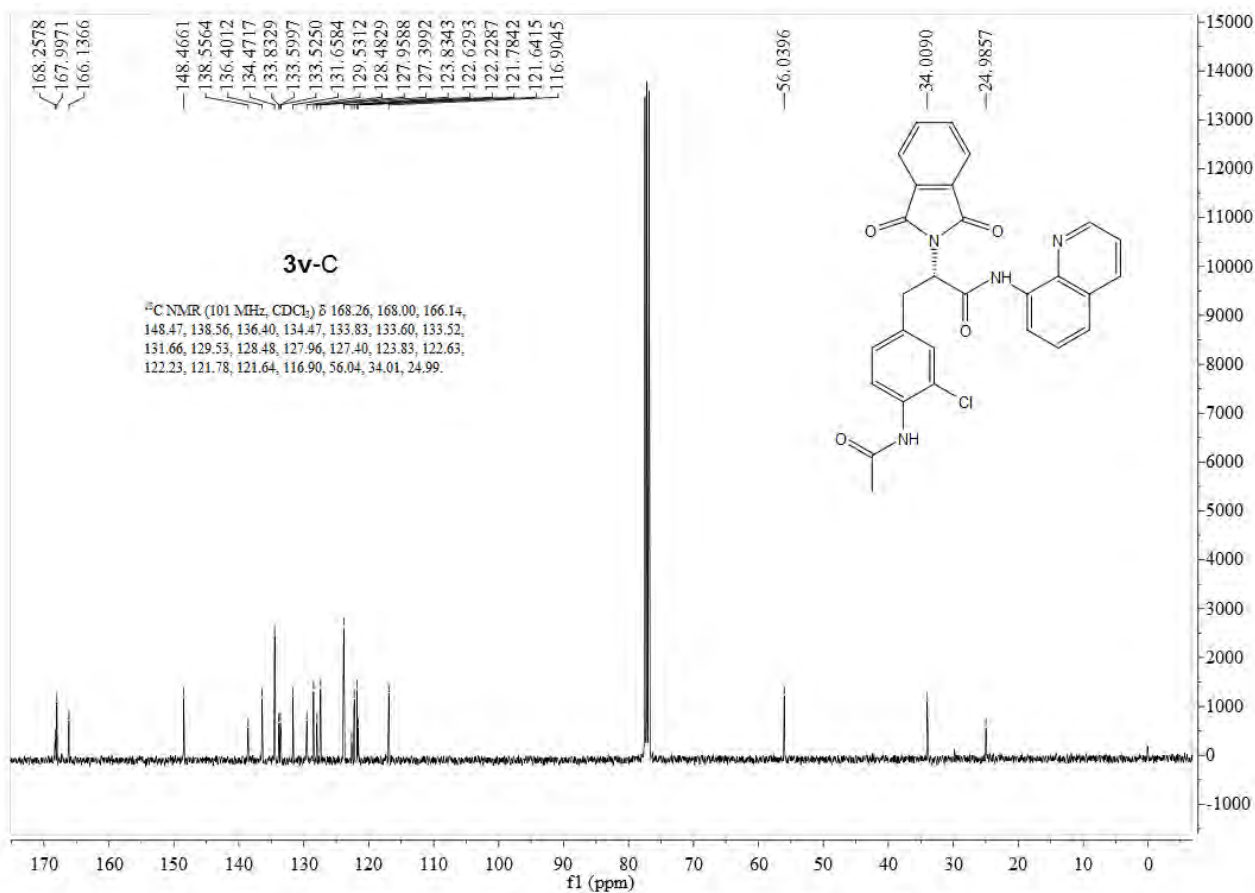

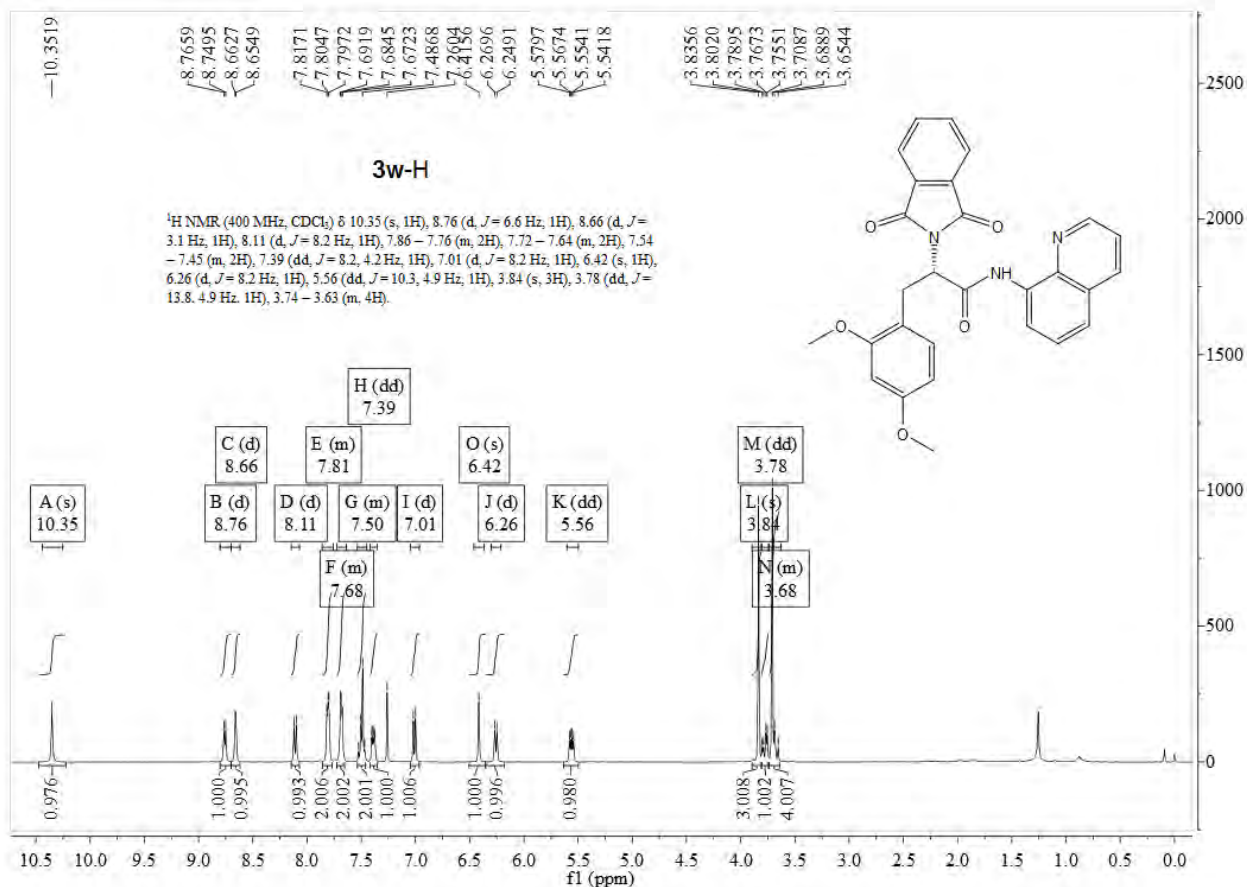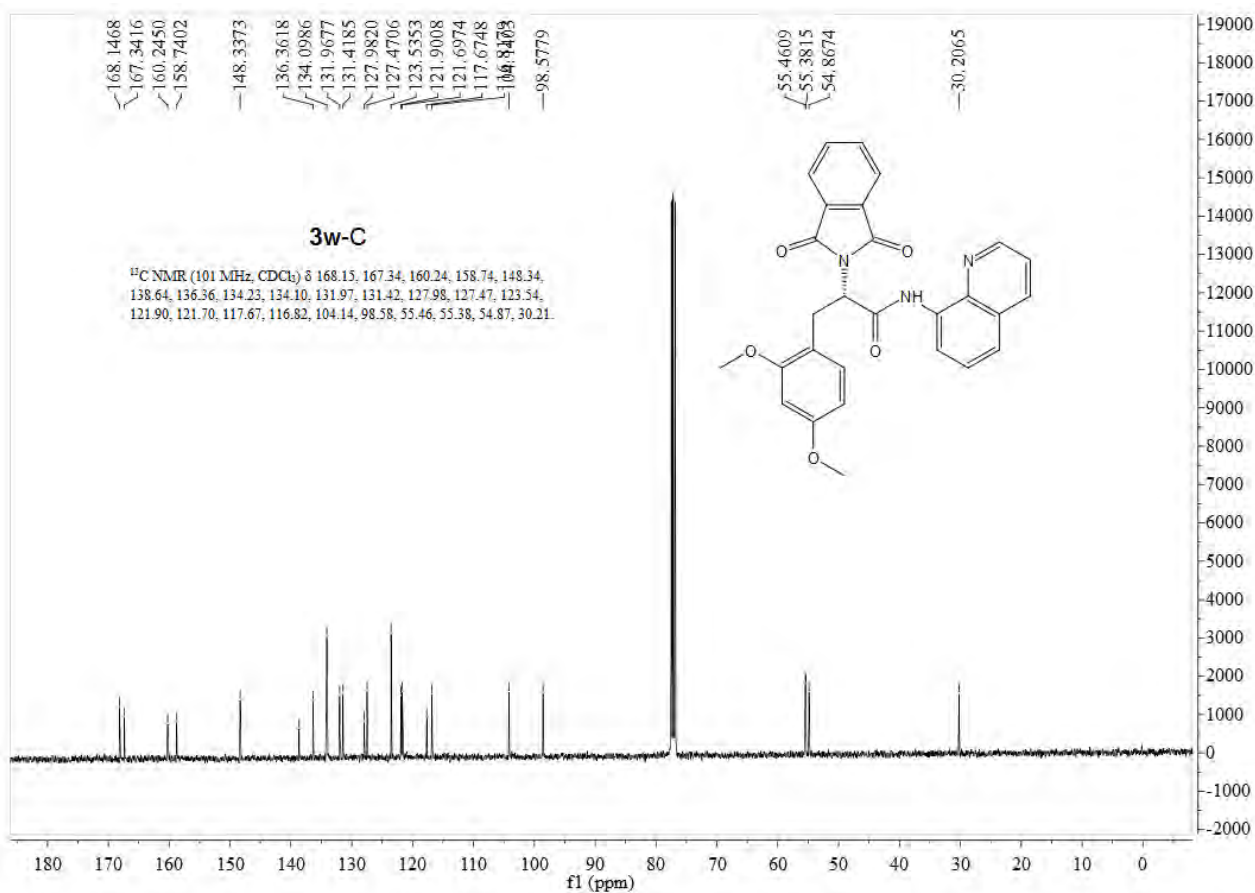

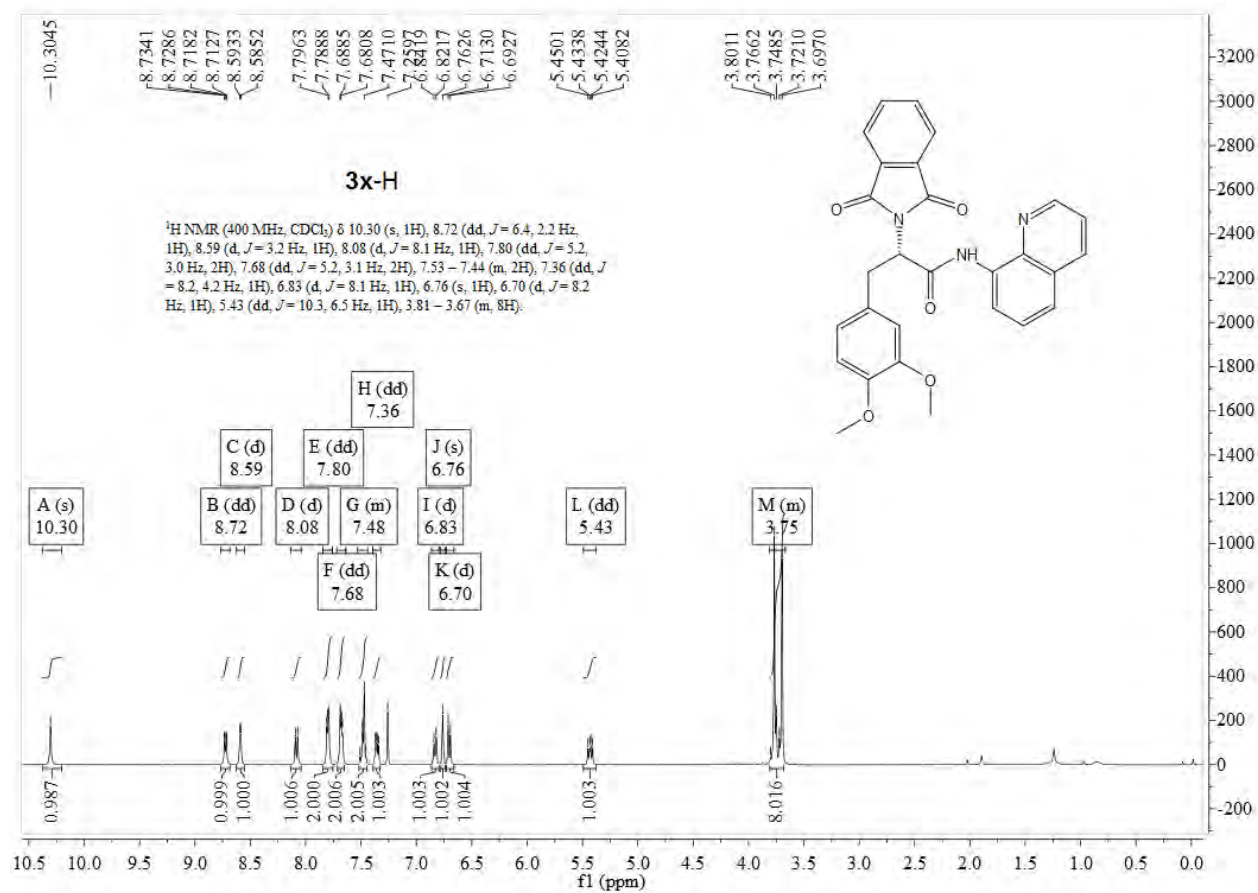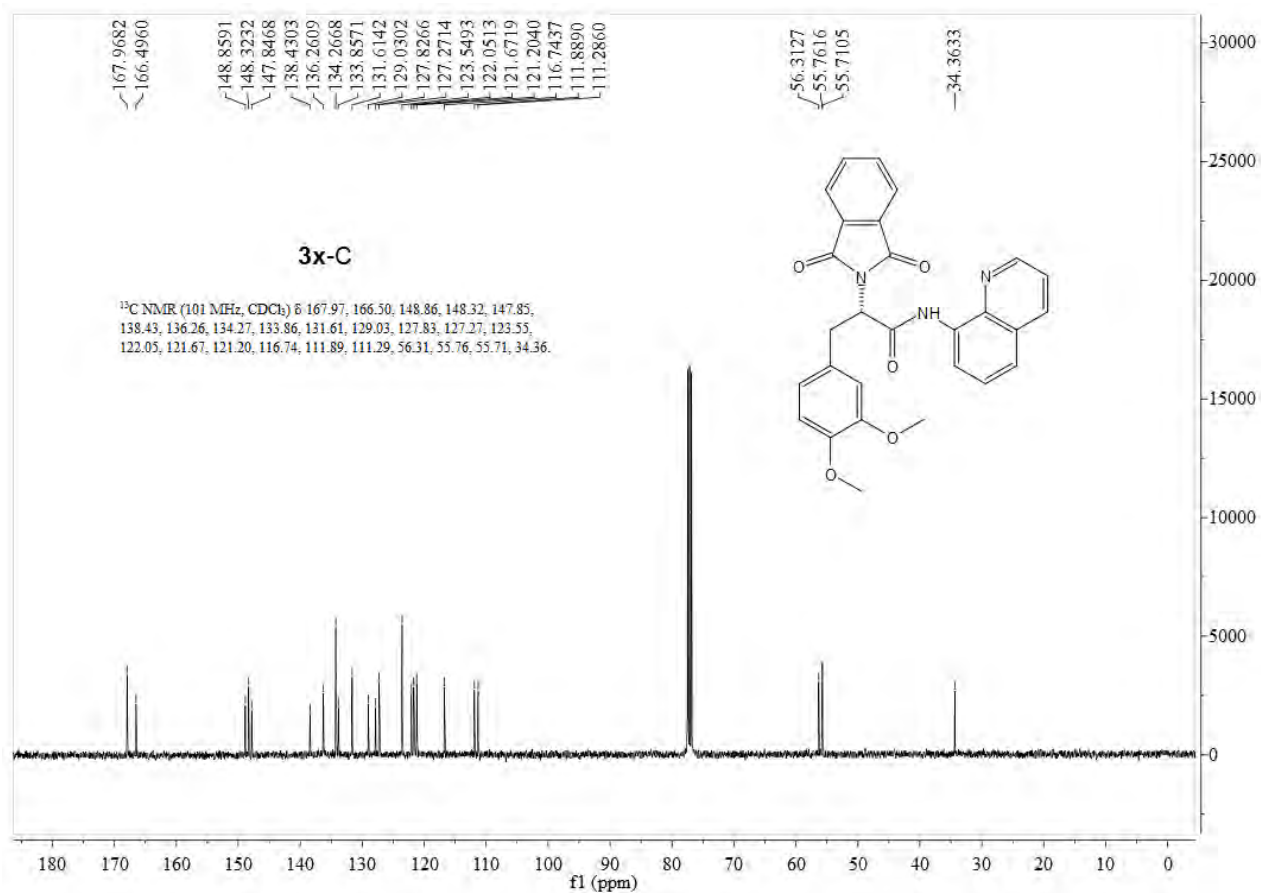

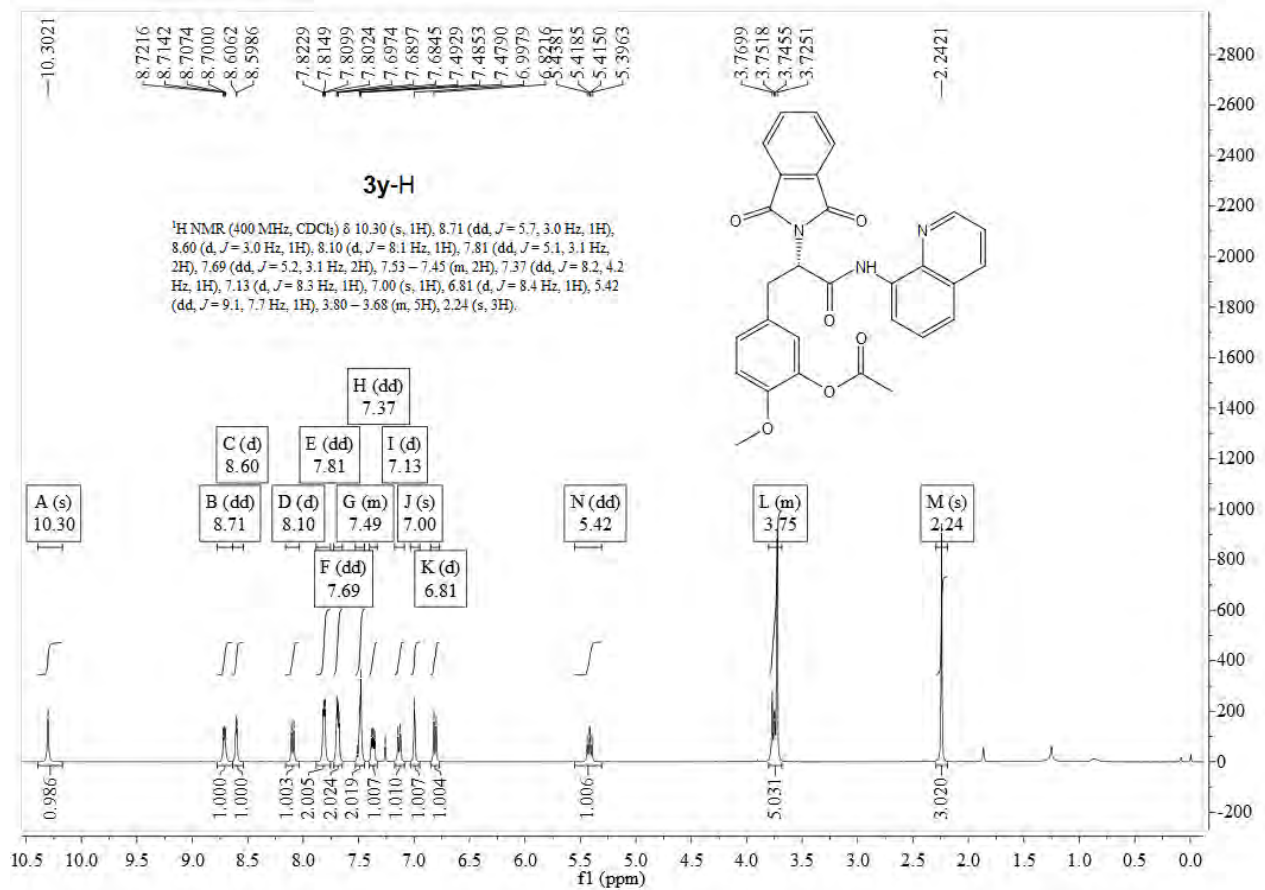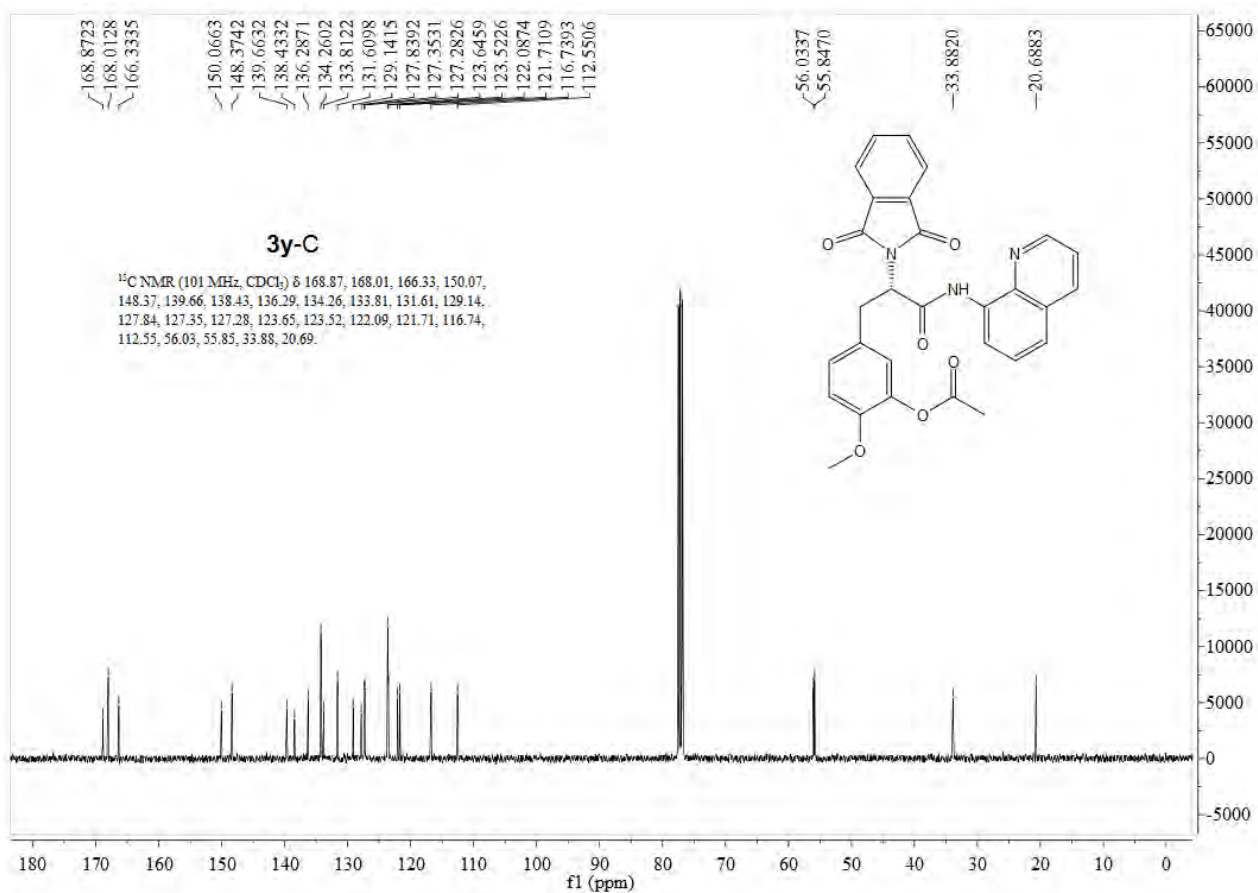



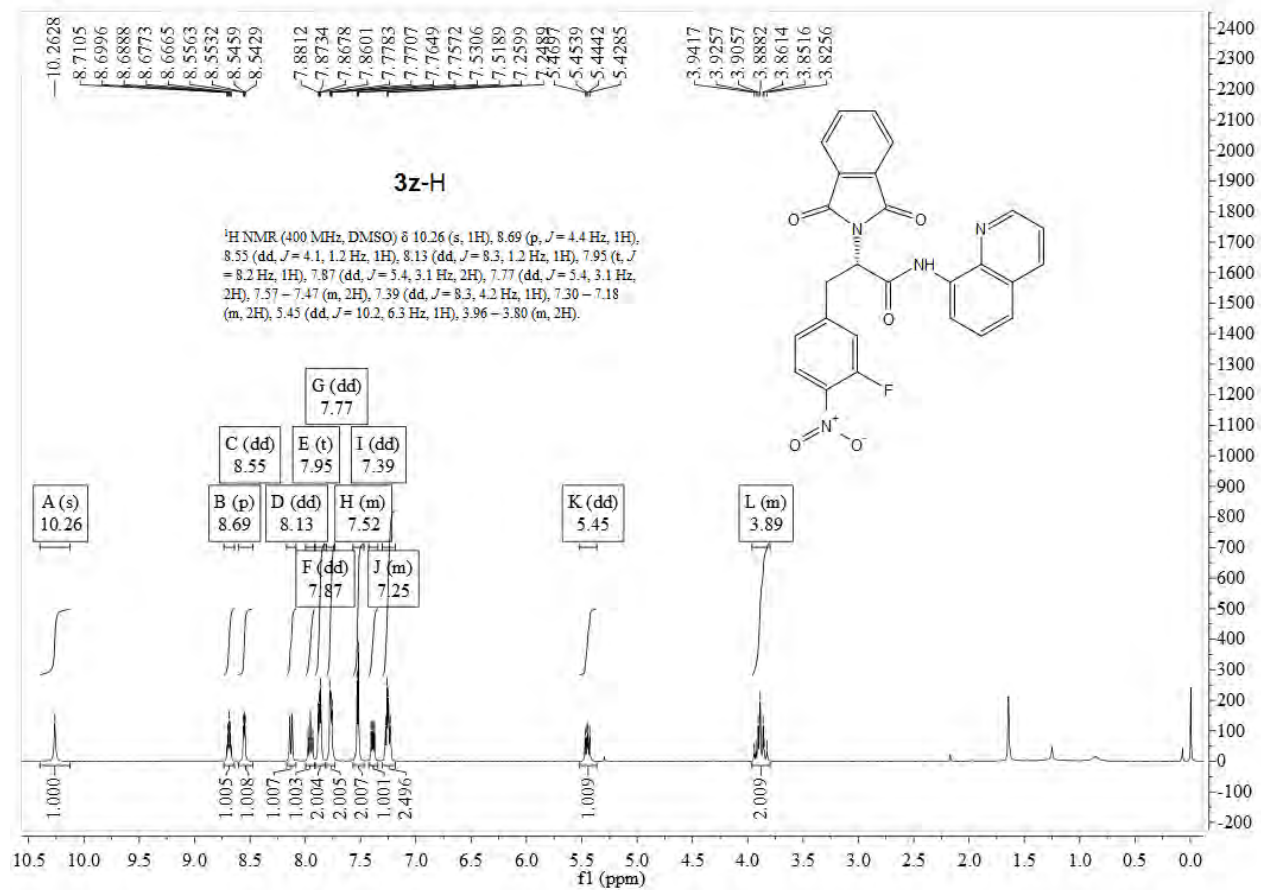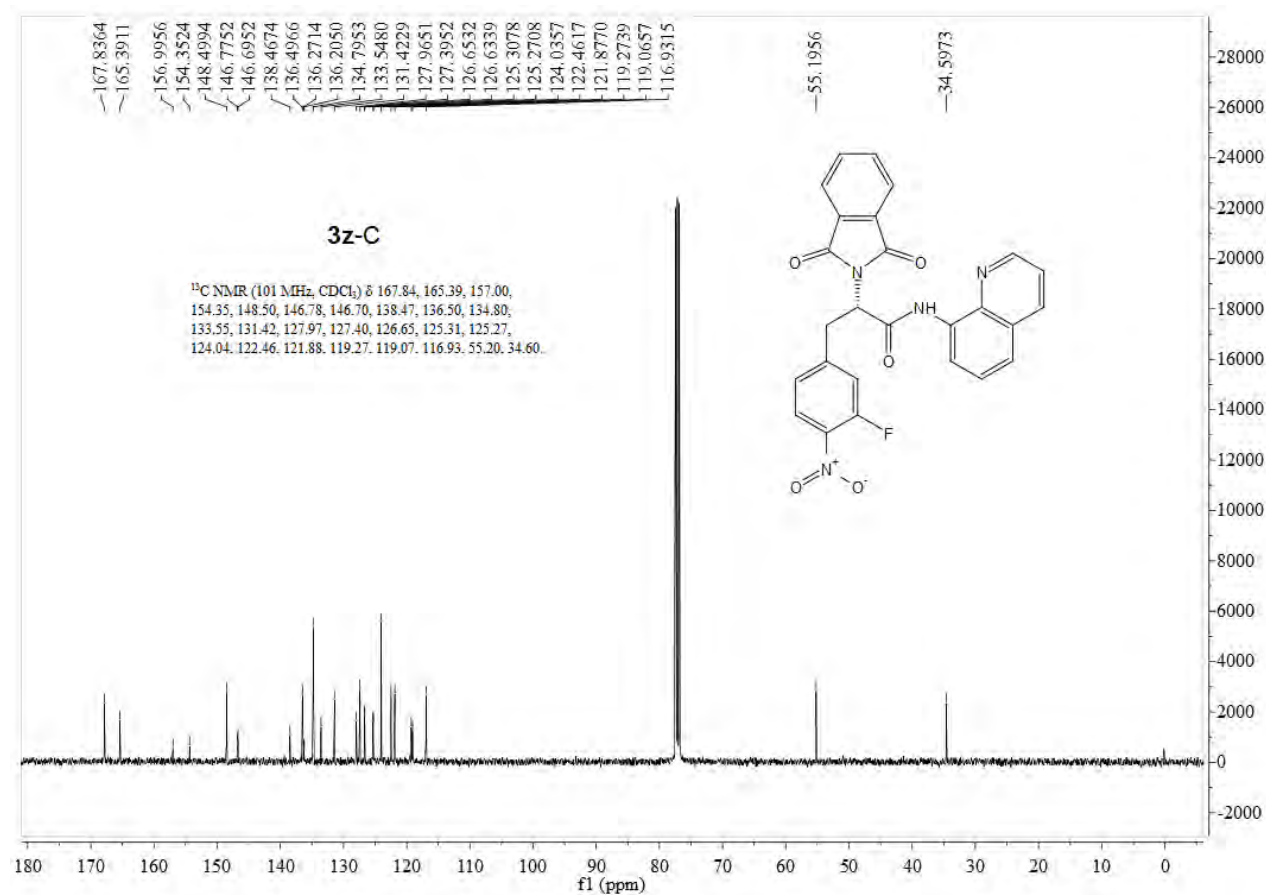

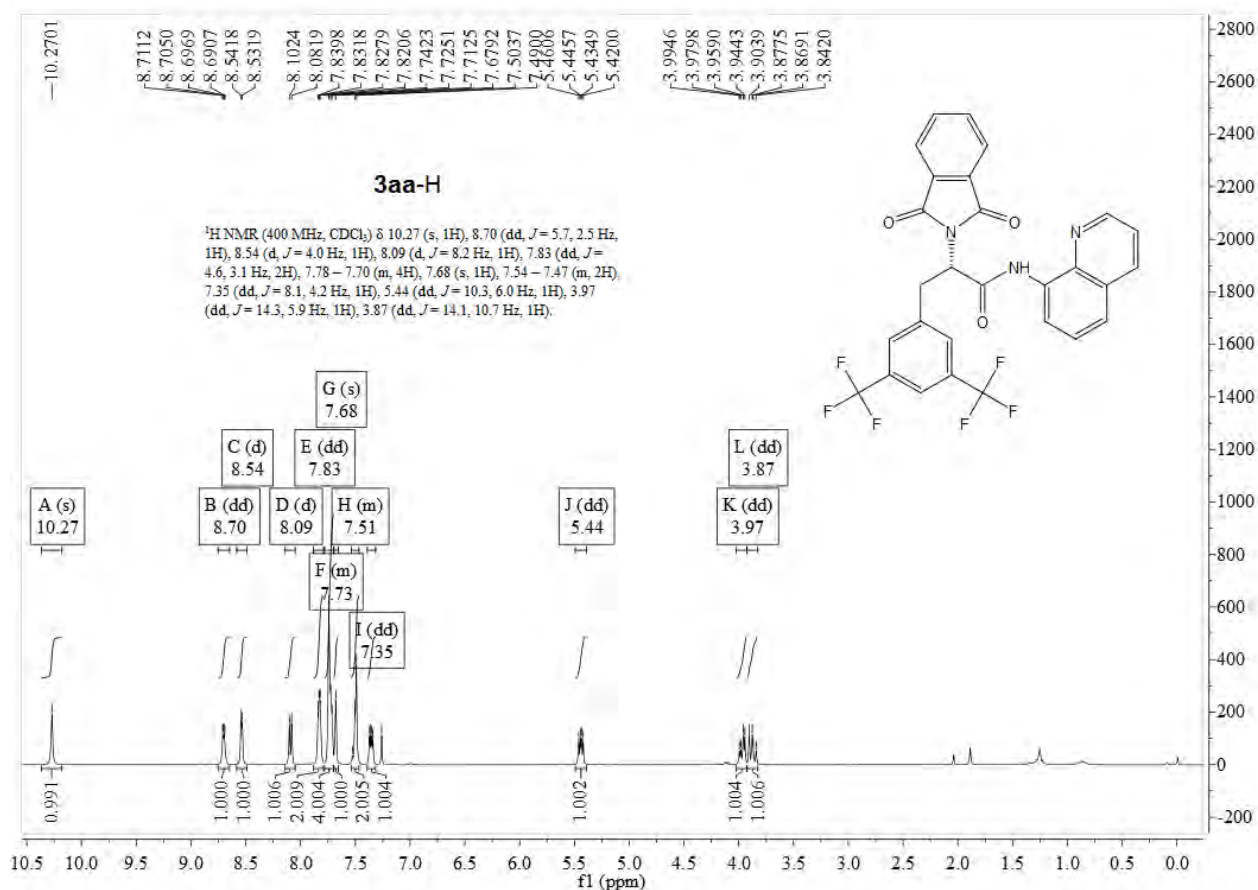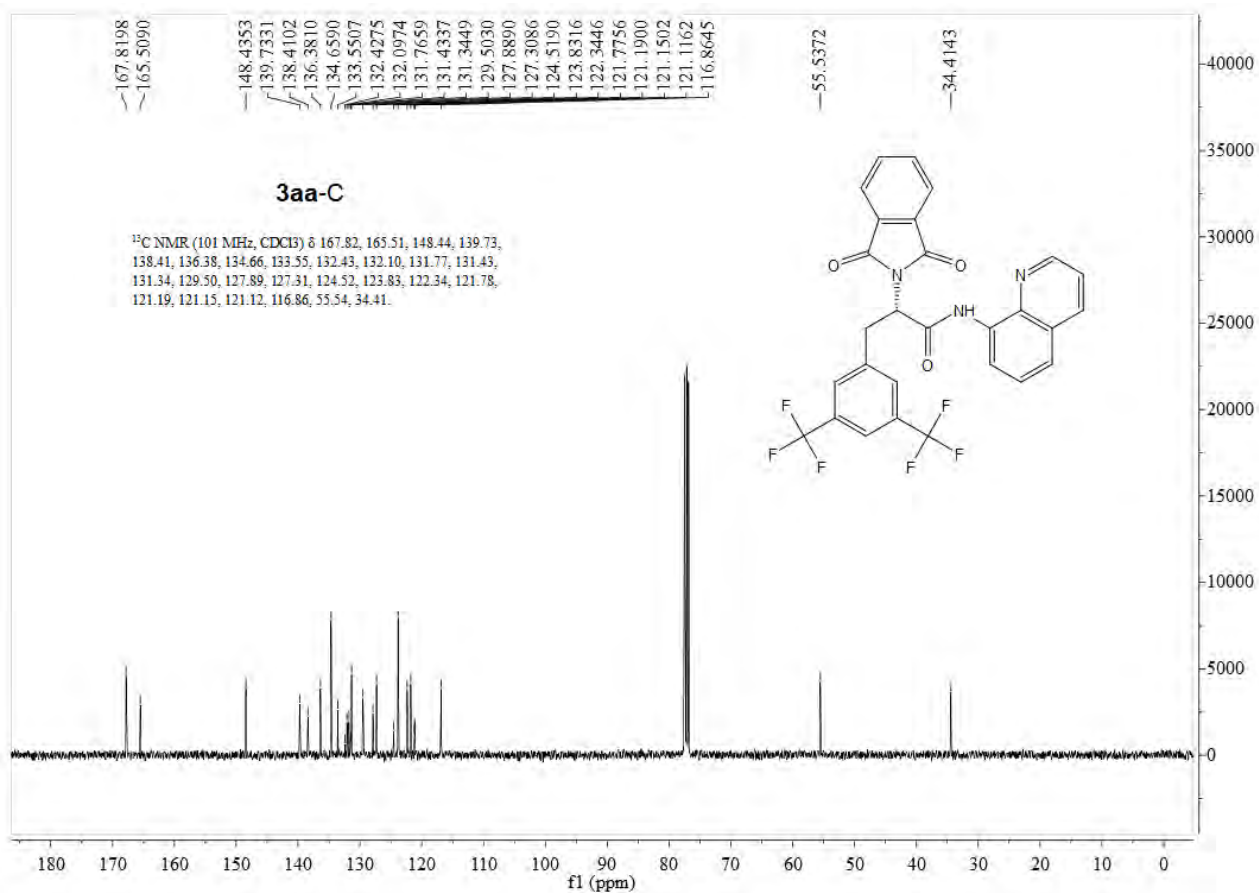

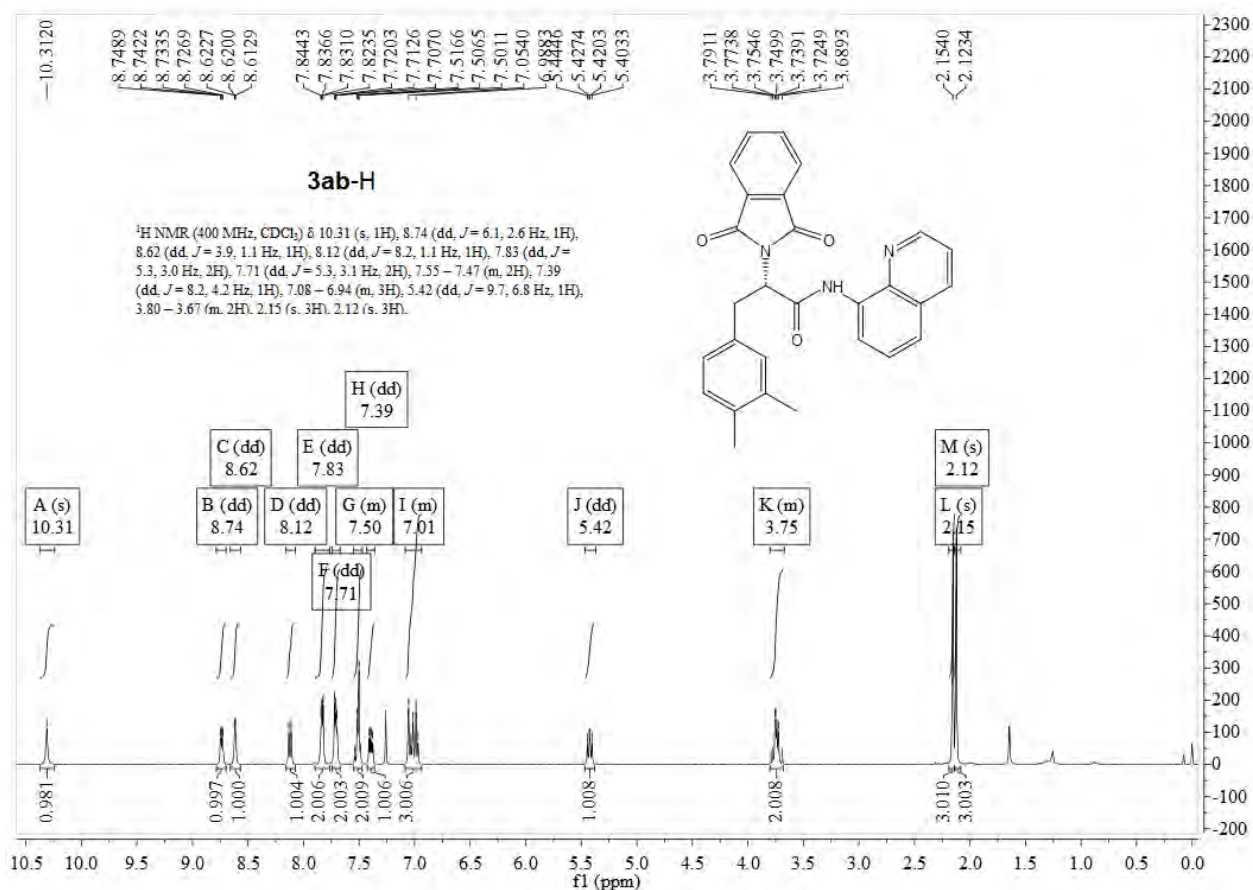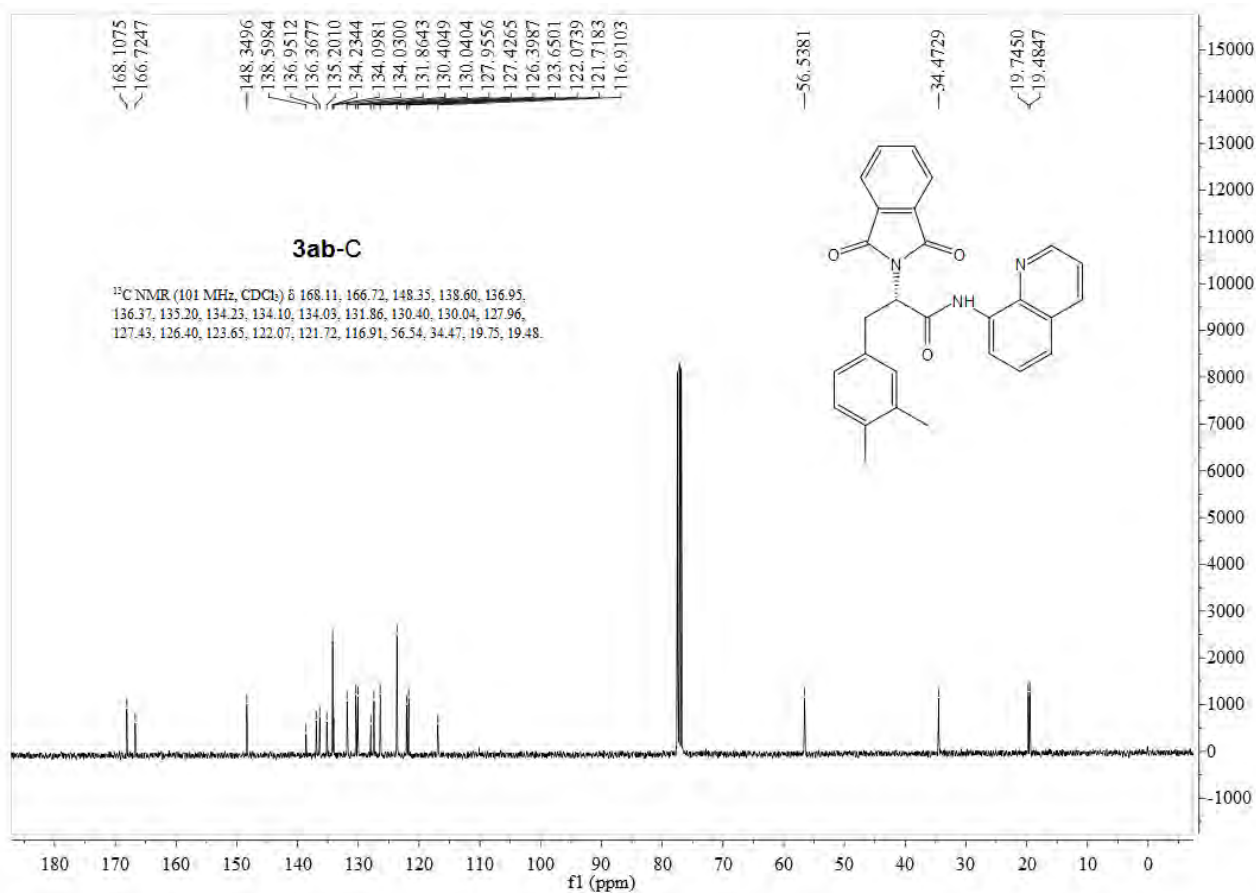

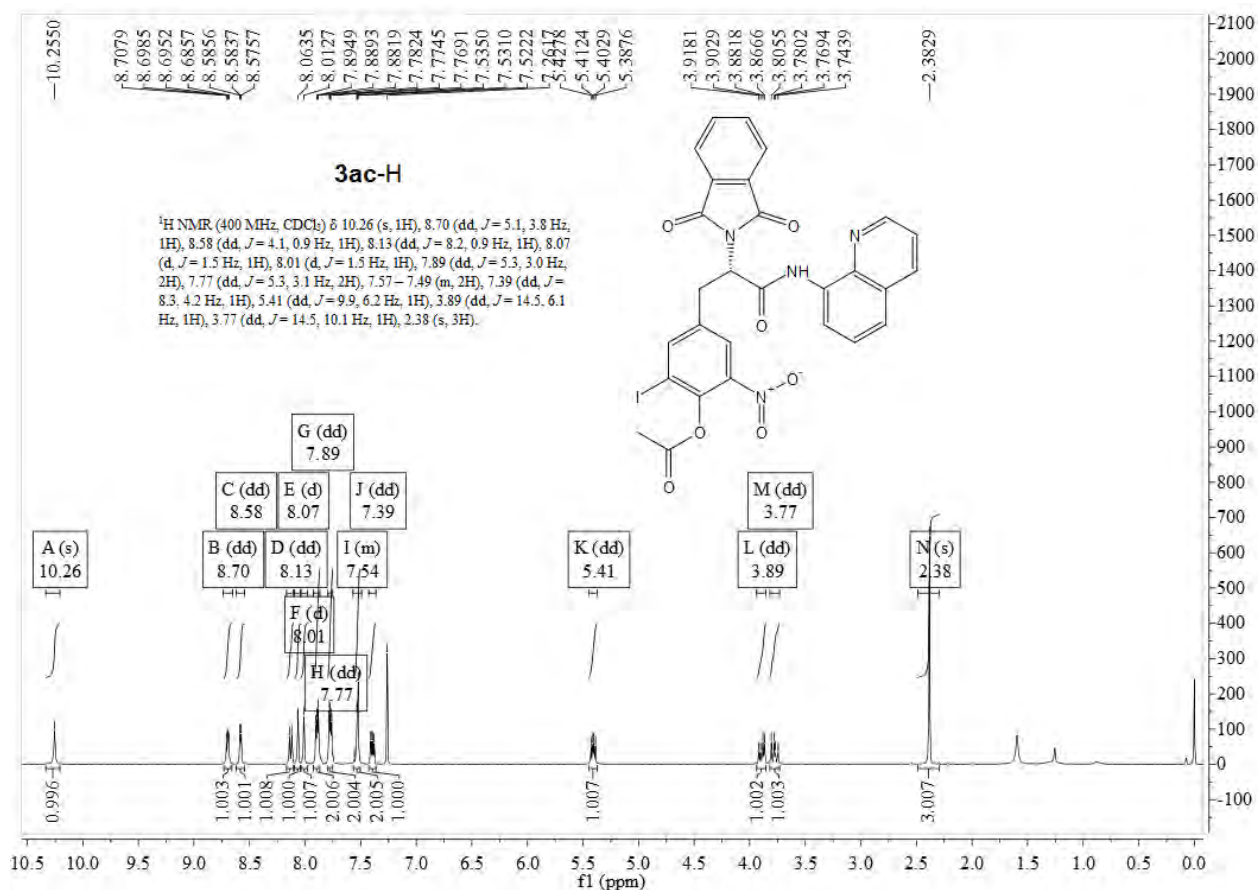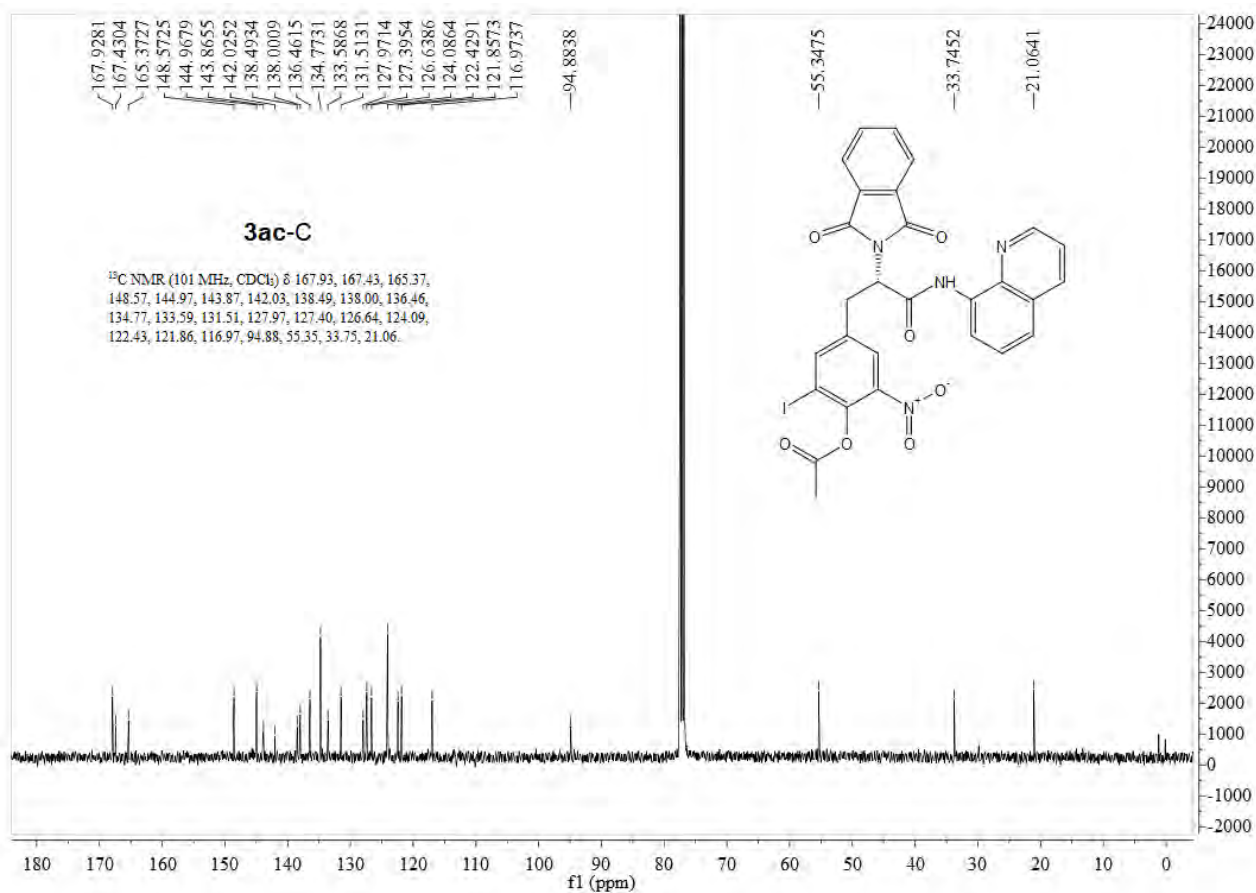



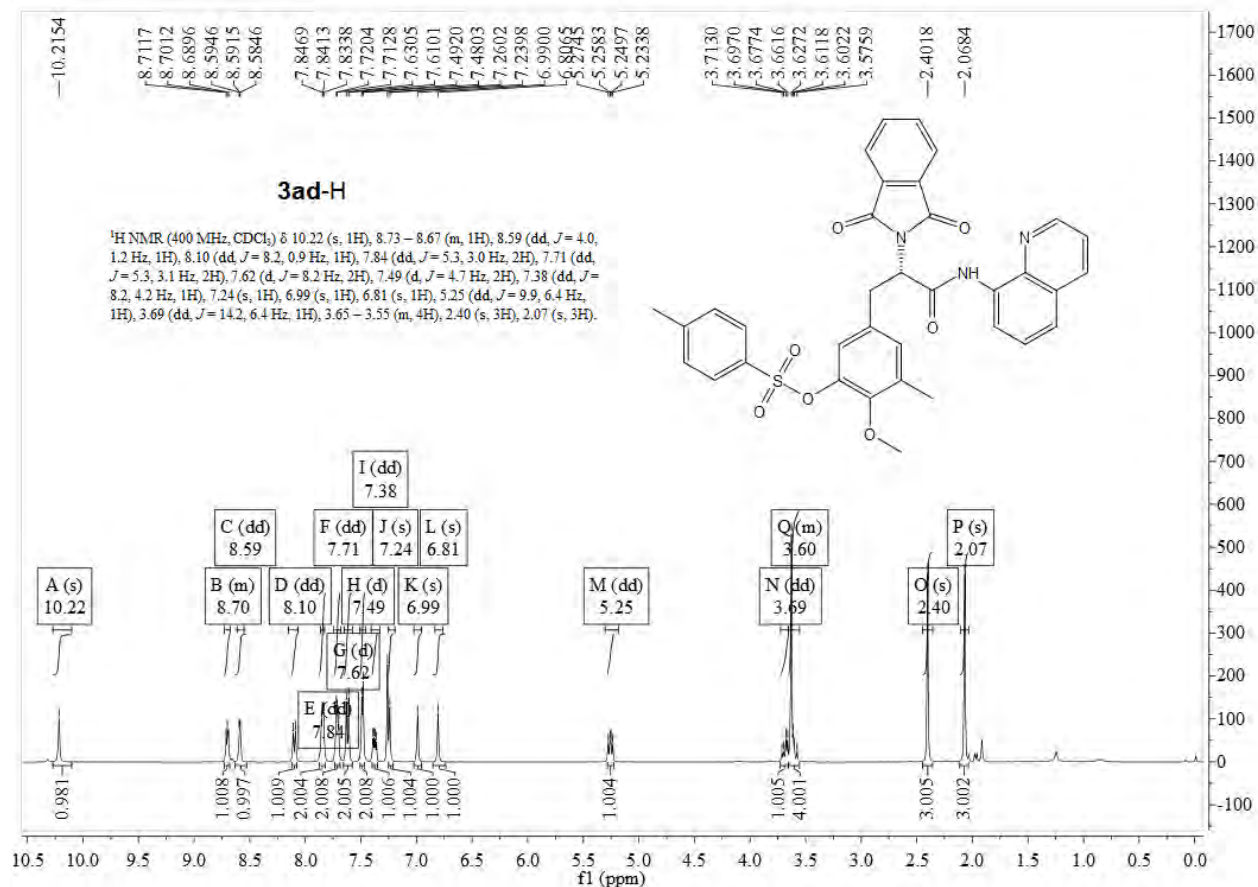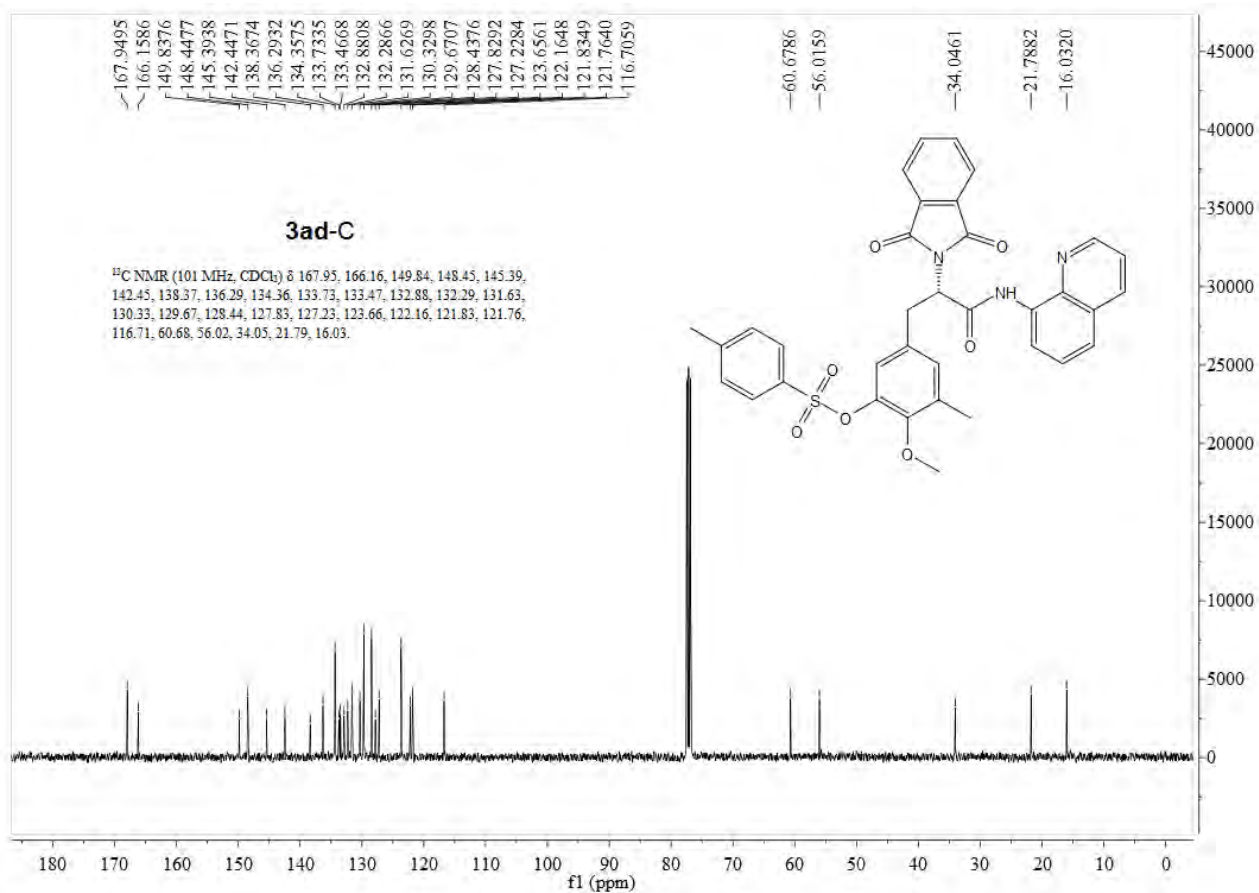

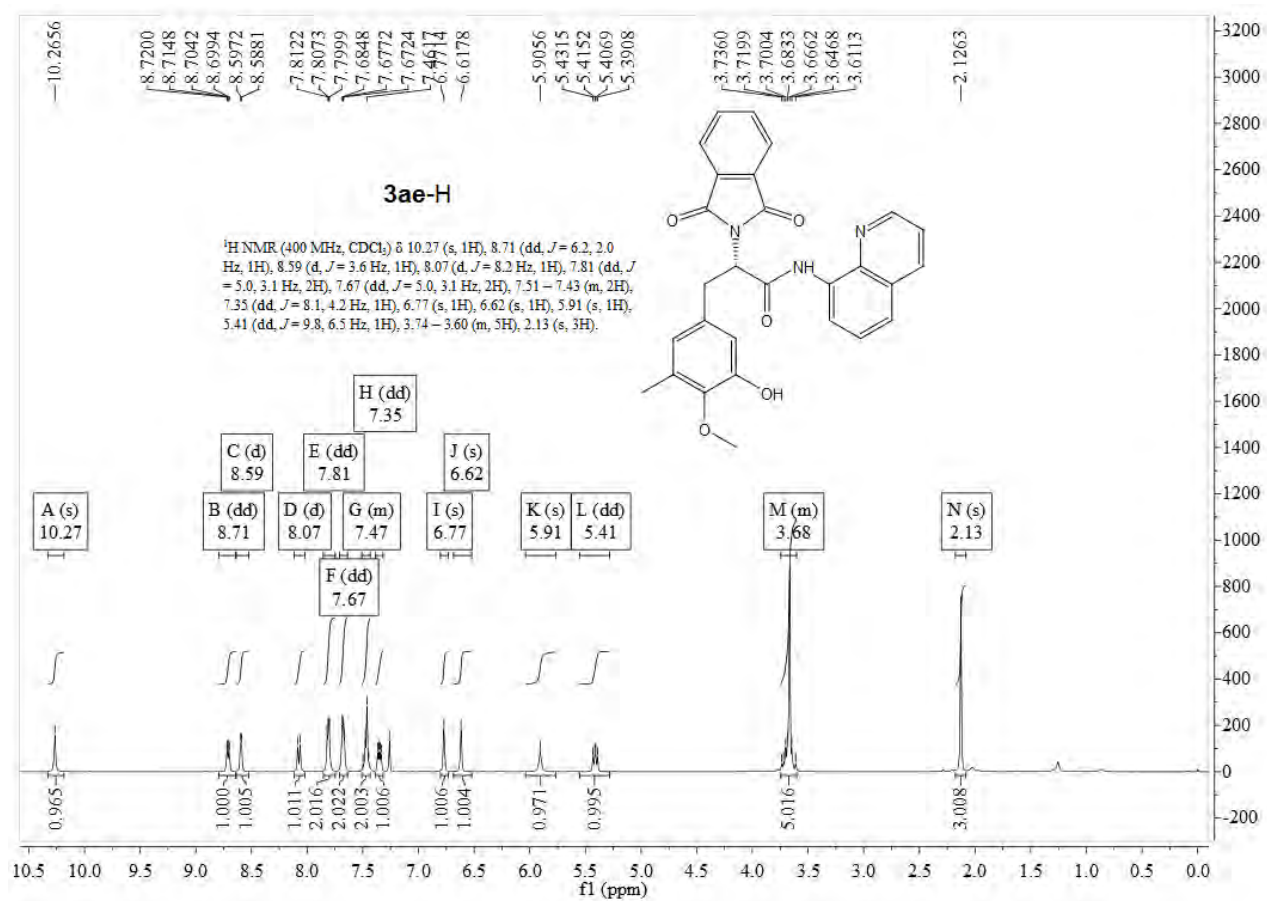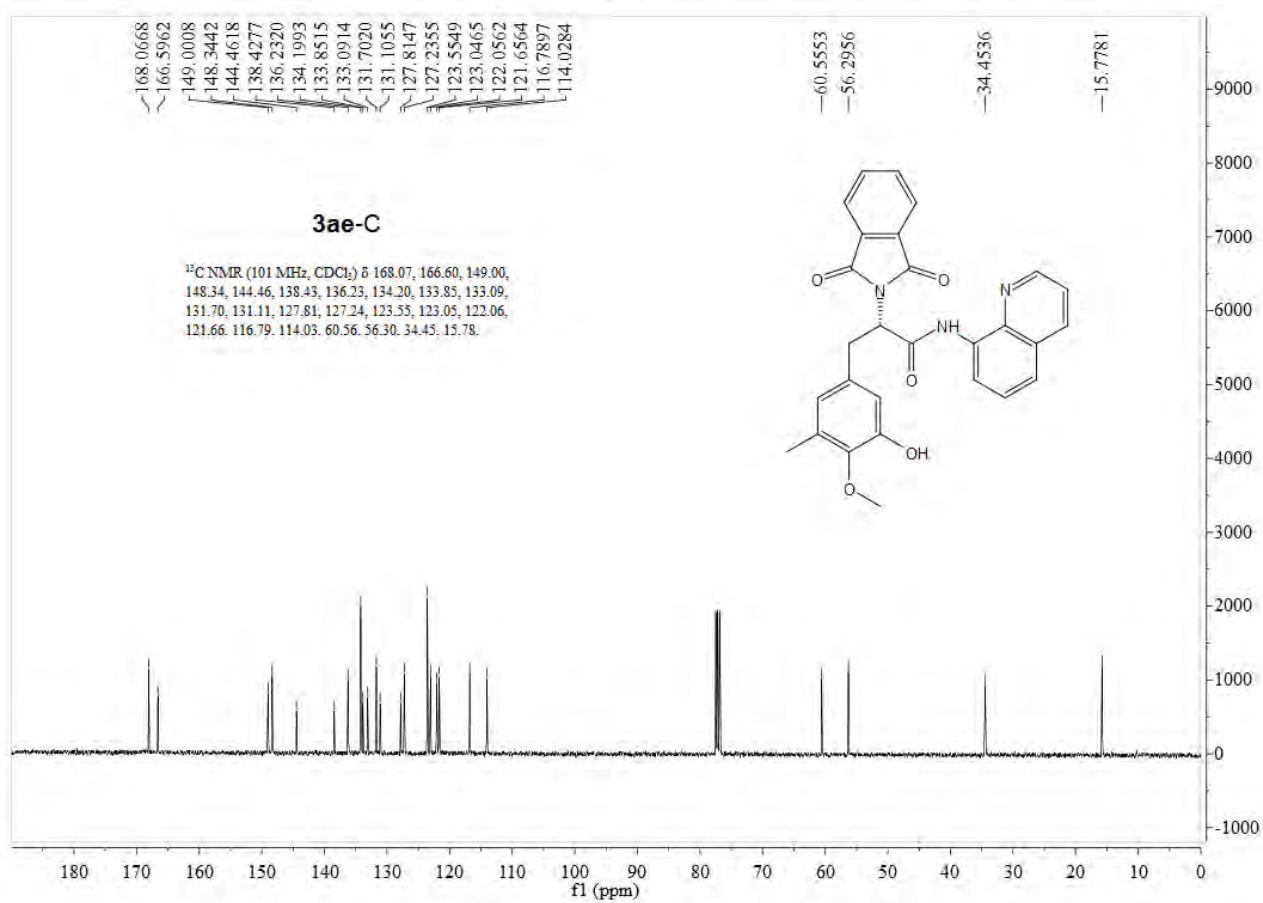

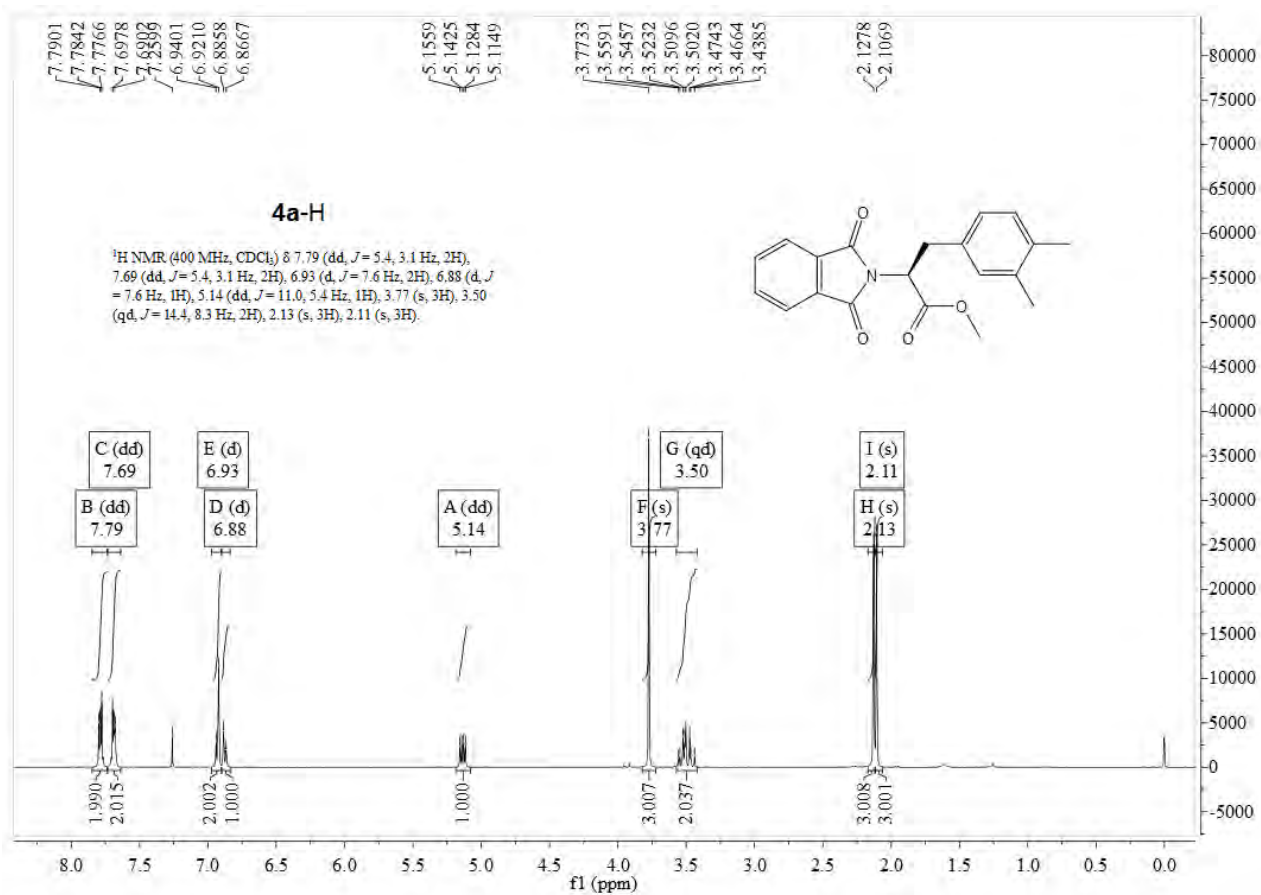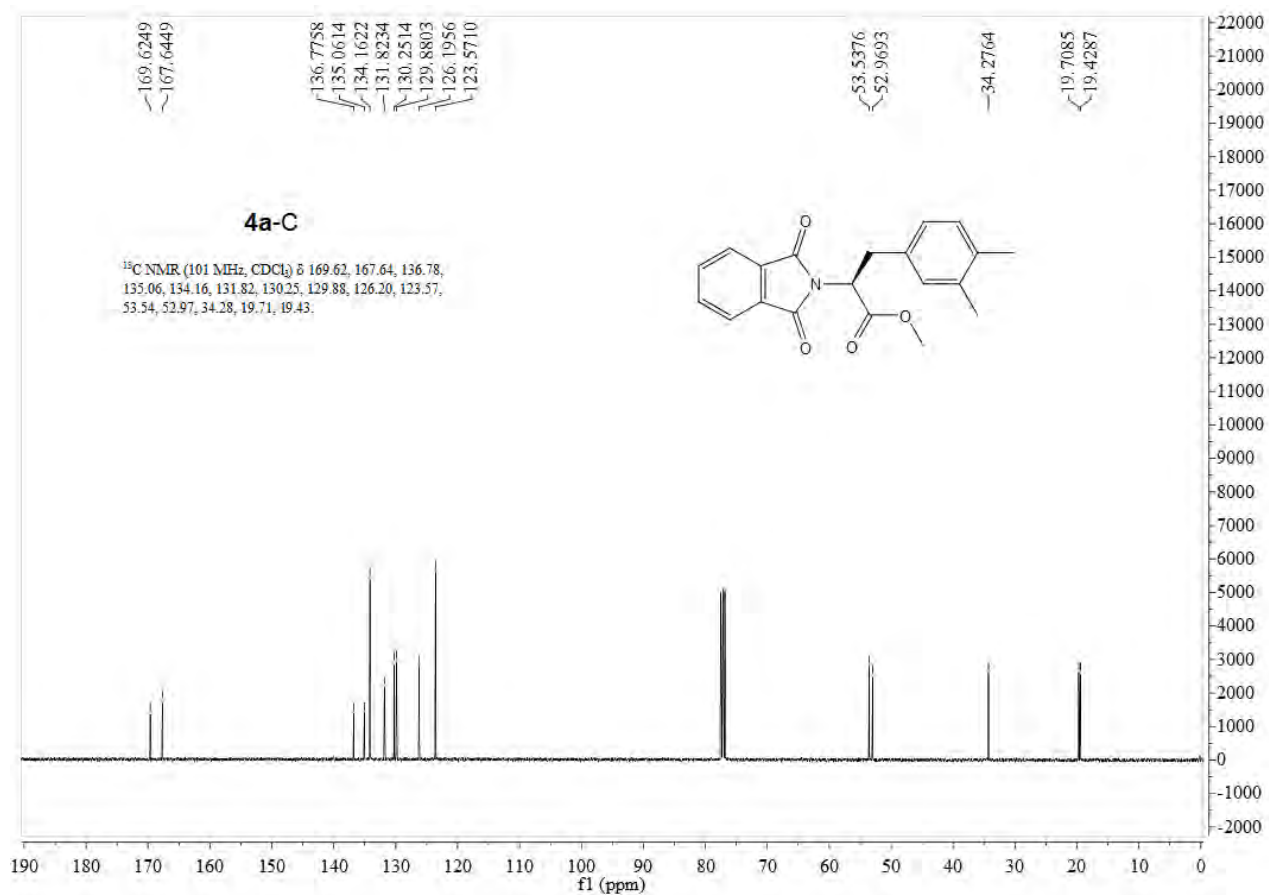

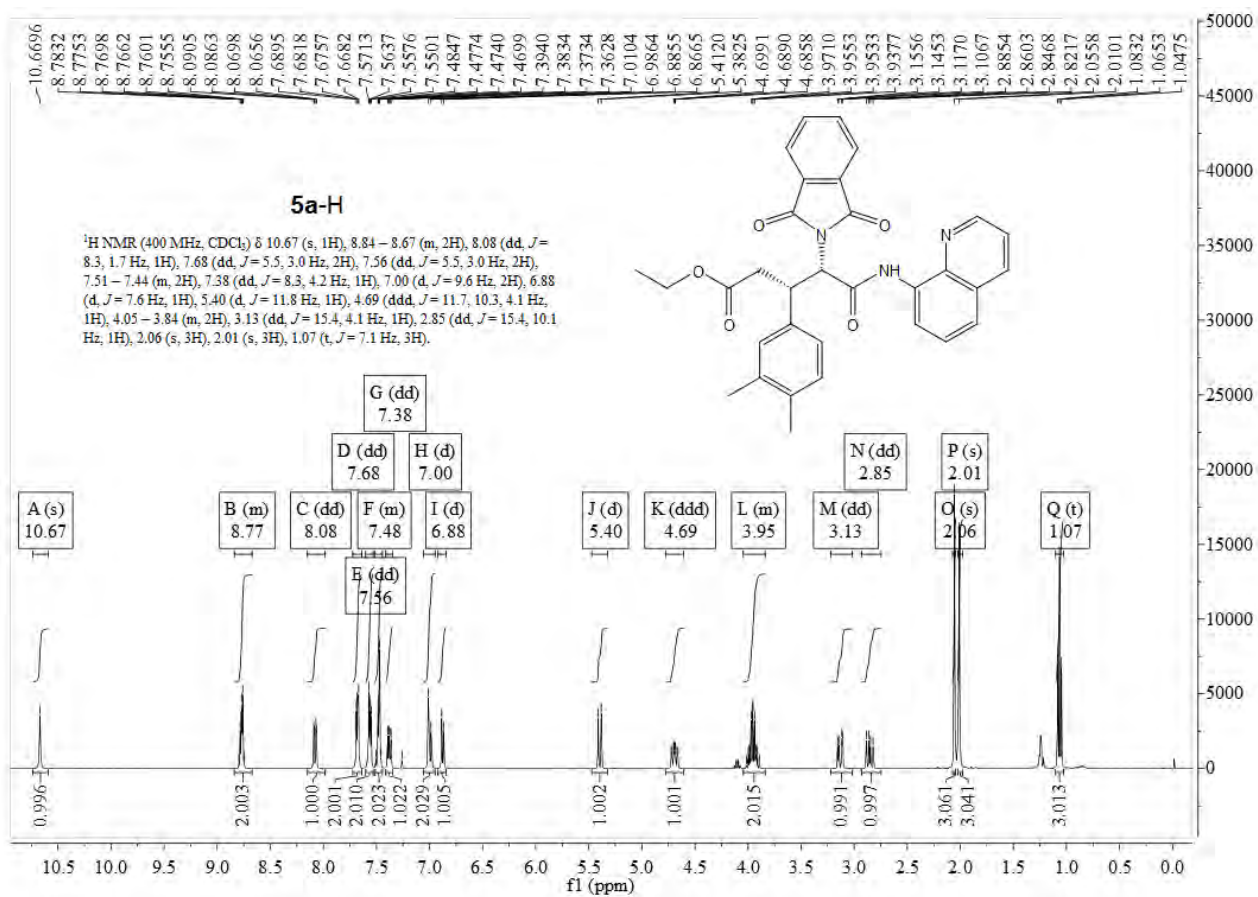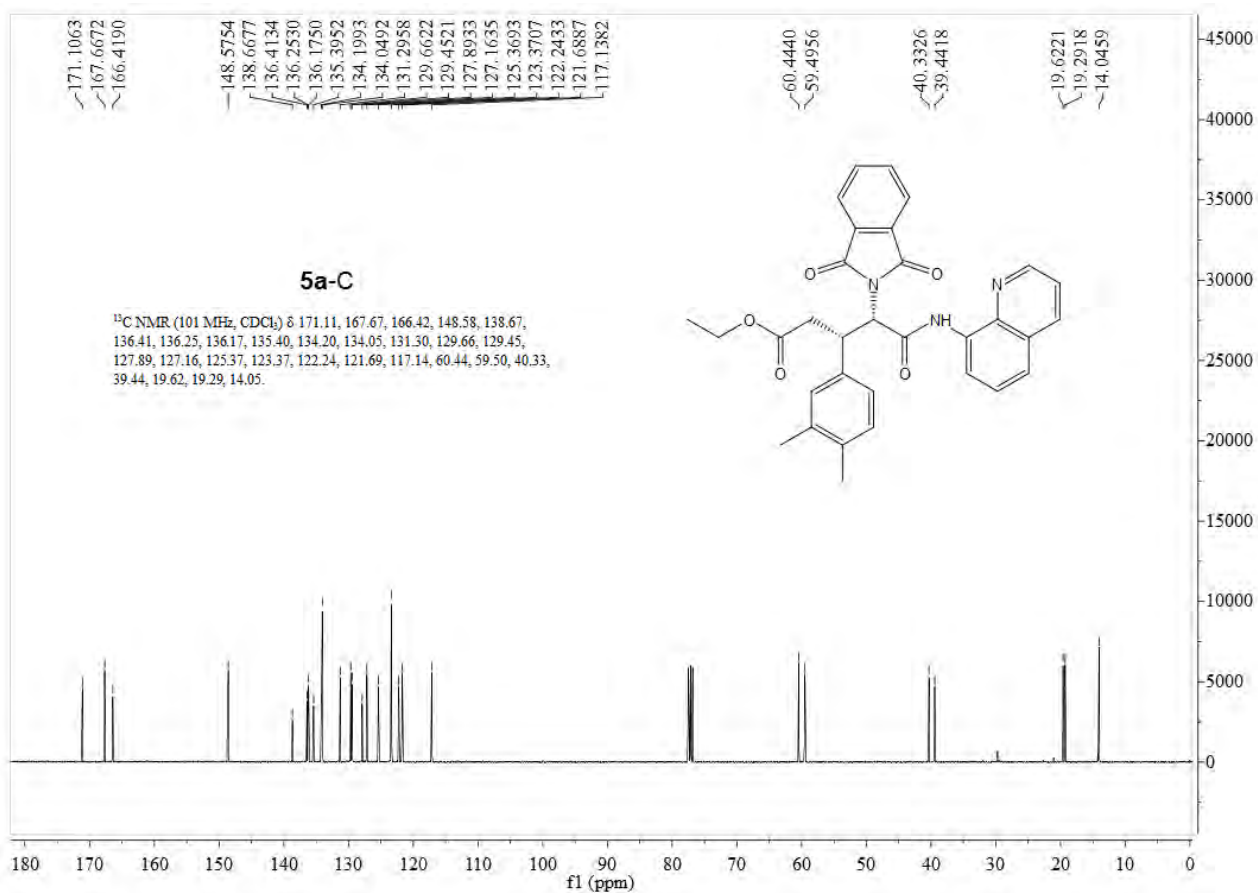



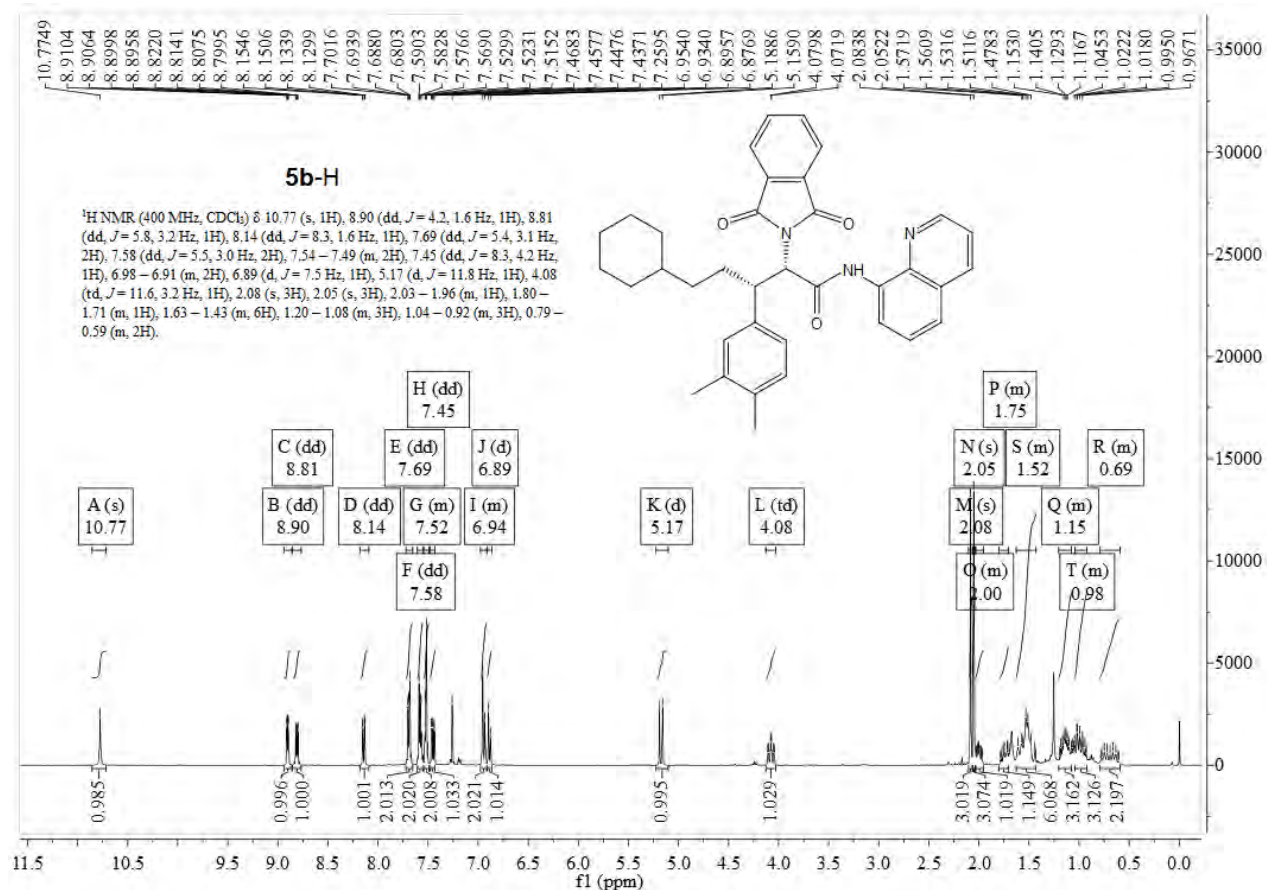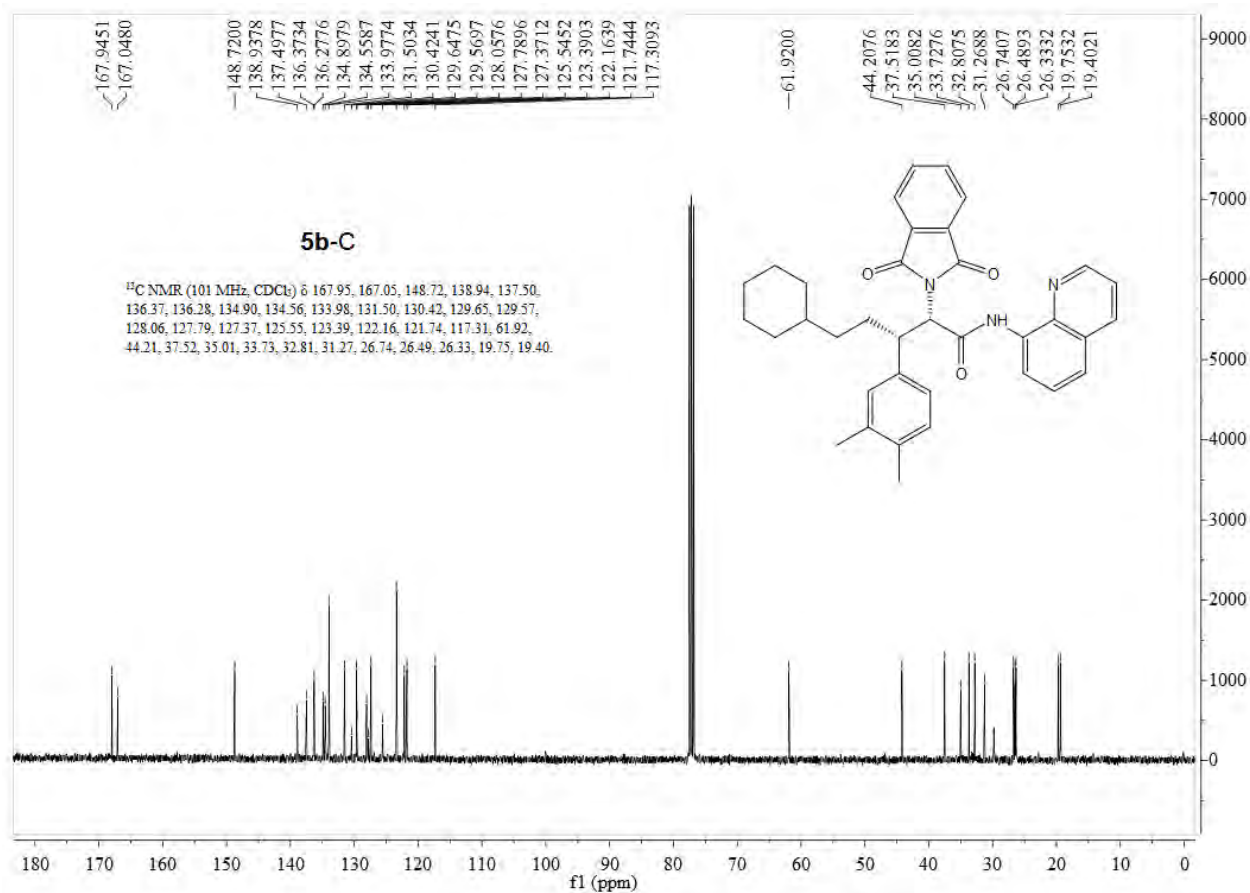

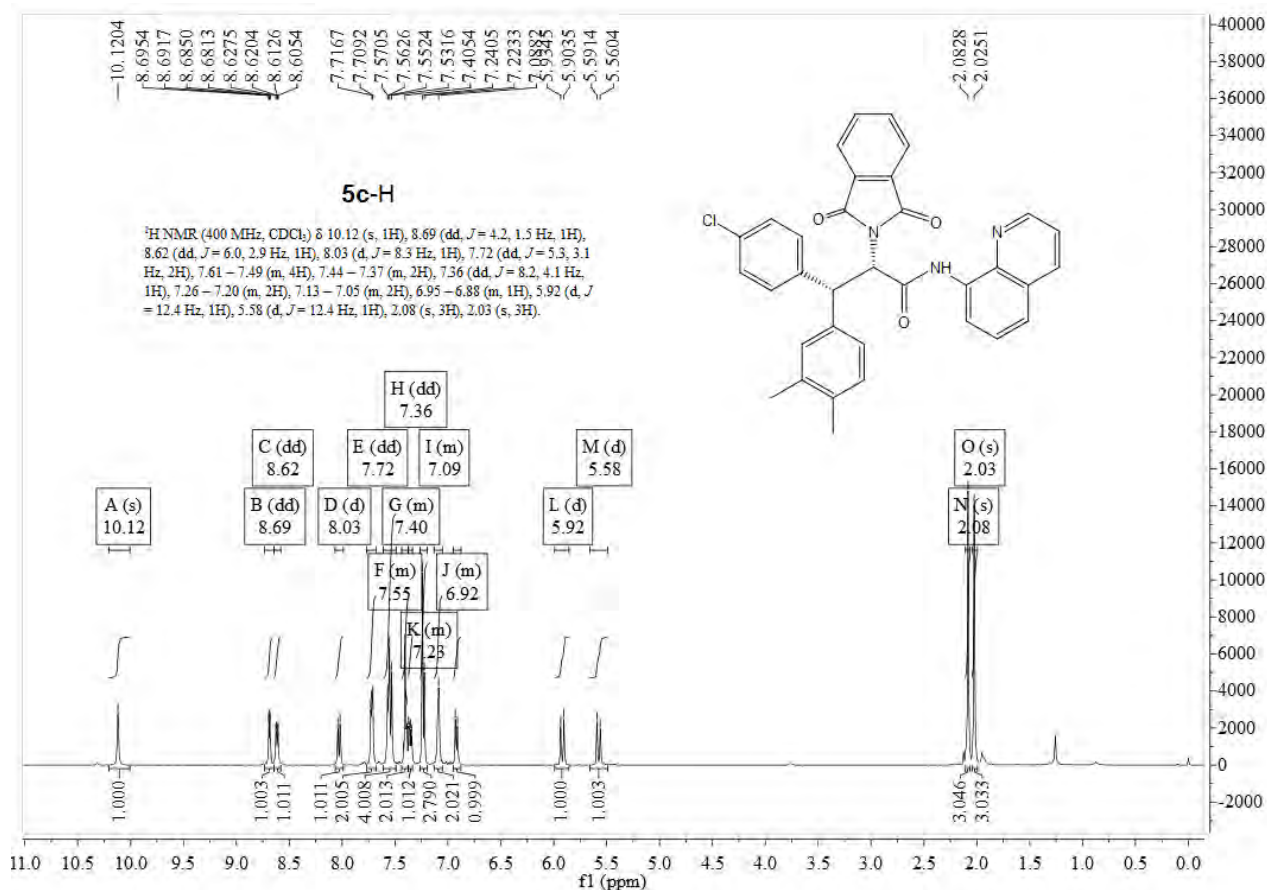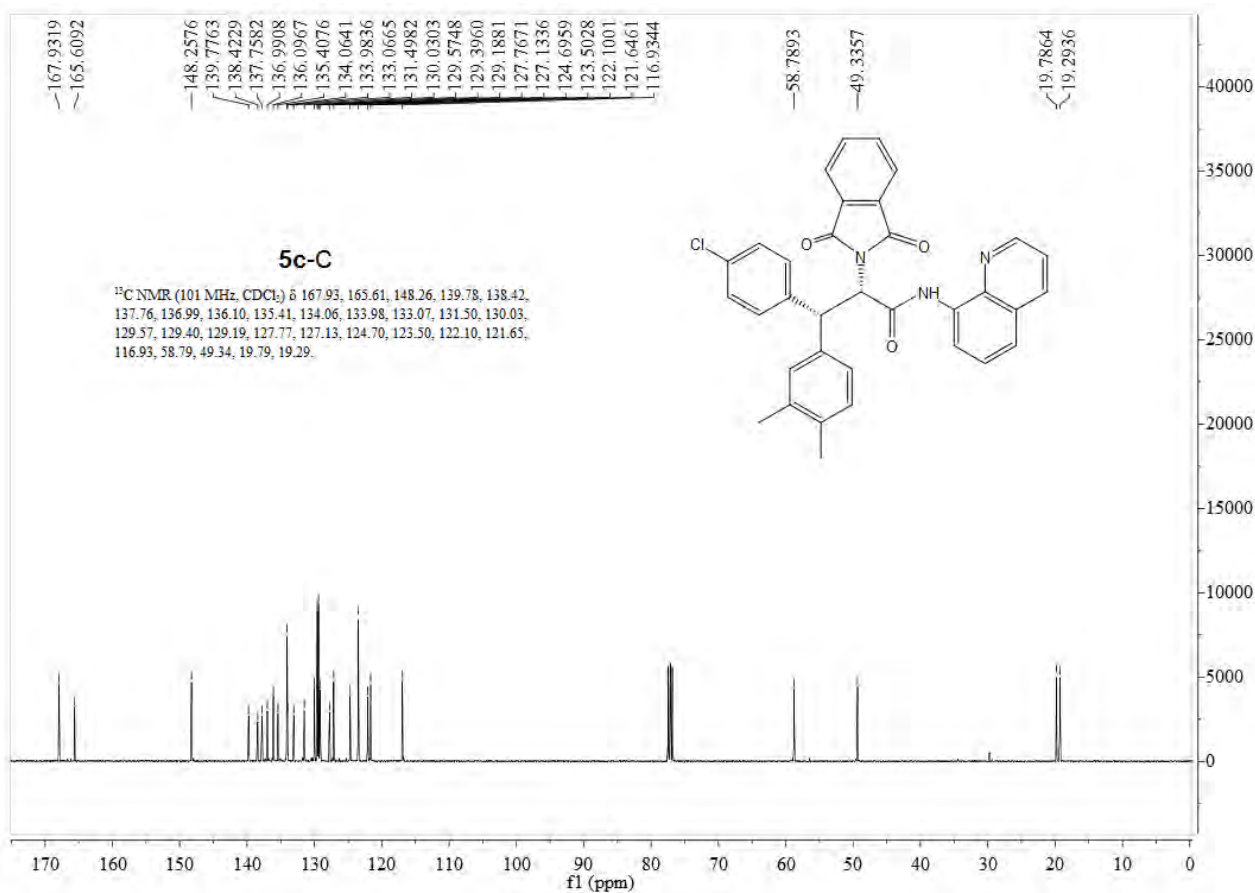

Supplement: c4cc06652a1.pdf [file c4cc06652a1.pdf]
